# Supplementary material for: Larvicidal and adulticidal activity of essential oils from plants of the Lamiaceae family against the West Nile virus vector, Culex pipiens (Diptera: Culicidae)
Source: PubMed Central journal article supplement (PMC9232543; doi:10.1016/j.sjbs.2022.103350), 2022-06-16

# My GC-MS Report

RT: 0.00 - 37.10 SM: 15B

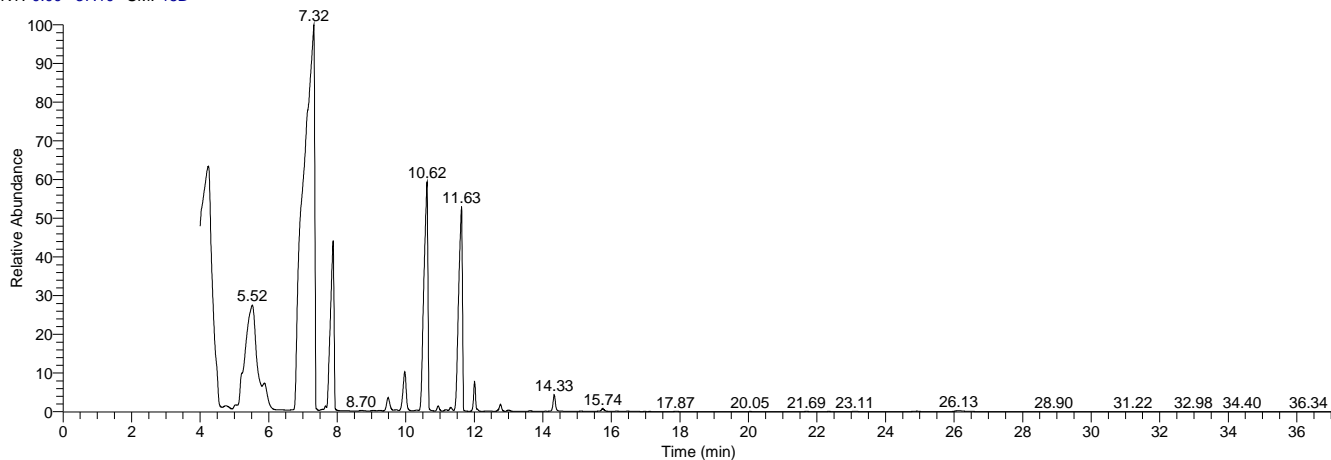

NL:  
2.60E9  
TIC MS  
Lavender\_oil  
1

| RT    | Area % | Peak Area      | Peak Height   |
|-------|--------|----------------|---------------|
| 4.26  | 13.71  | 8336492900.63  | 697429860.56  |
| 4.50  | 0.25   | 154909057.07   | 57642903.37   |
| 5.19  | 0.46   | 280772178.21   | 78836482.86   |
| 5.52  | 8.24   | 5007377838.79  | 376205403.32  |
| 5.89  | 0.70   | 425340162.10   | 66014869.38   |
| 6.88  | 6.10   | 3710435713.27  | 397416709.28  |
| 7.12  | 0.56   | 341823470.06   | 96569564.69   |
| 7.33  | 21.92  | 13329674483.47 | 2117722417.52 |
| 7.66  | 0.10   | 58279099.53    | 26430609.79   |
| 7.89  | 11.85  | 7203733810.27  | 1121851949.68 |
| 9.48  | 0.75   | 457341384.15   | 82160639.64   |
| 9.97  | 2.24   | 1359985919.45  | 250072852.48  |
| 10.63 | 16.35  | 9937617862.18  | 1489085704.51 |
| 10.95 | 0.26   | 159212634.14   | 37796866.06   |
| 11.63 | 14.09  | 8567015622.13  | 1333205117.22 |
| 12.01 | 1.29   | 786098696.69   | 232459266.03  |
| 12.76 | 0.35   | 210505368.86   | 48877491.37   |
| 14.33 | 0.77   | 470823529.81   | 118358748.34  |

Lavender\_oil #77 RT: 4.26 AV: 1 NL: 2.43E8  
T: + c EI Full ms [50.000-750.000]

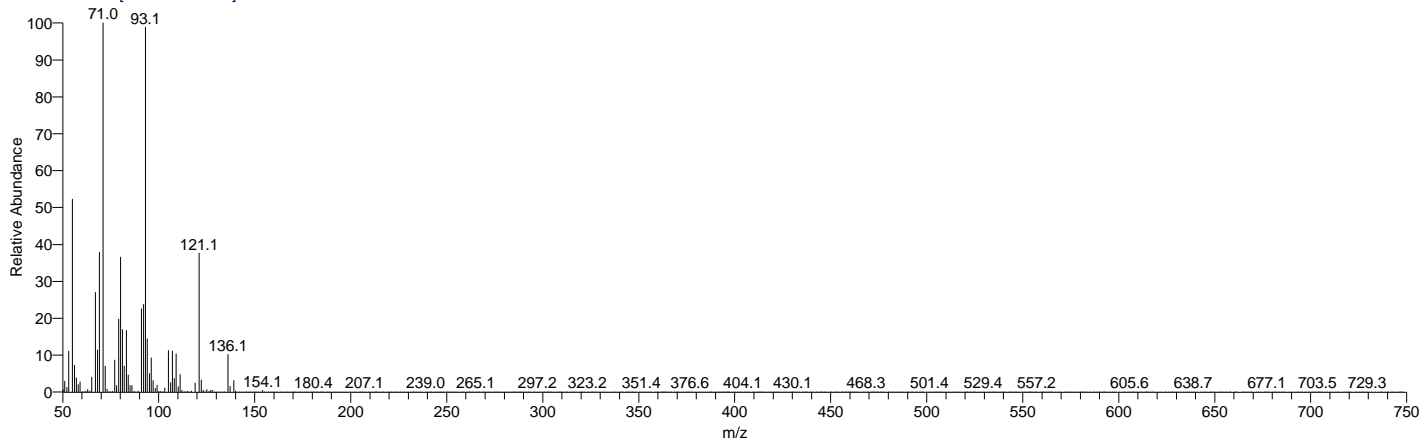

| RT   | Compound Name                       | Area % | MF  | Molecular Formula | Molecular Weight | Cas #   | Library             |
|------|-------------------------------------|--------|-----|-------------------|------------------|---------|---------------------|
| 4.26 | 1,6-OCTADIEN-3-OL,<br>3,7-DIMETHYL- | 13.71  | 942 | C10H18O           | 154              | 78-70-6 | WileyRegi<br>stry8e |

# My GC-MS Report

| RT   | Compound Name                       | Area % | MF  | Molecular Formula | Molecular Weight | Cas #   | Library             |
|------|-------------------------------------|--------|-----|-------------------|------------------|---------|---------------------|
| 4.26 | 1,6-OCTADIEN-3-OL,<br>3,7-DIMETHYL- | 13.71  | 940 | C10H18O           | 154              | 78-70-6 | WileyRegi<br>stry8e |
| 4.26 | 1,6-OCTADIEN-3-OL,<br>3,7-DIMETHYL- | 13.71  | 933 | C10H18O           | 154              | 78-70-6 | WileyRegi<br>stry8e |
| 4.26 | Linalool                            | 13.71  | 925 | C10H18O           | 154              | 78-70-6 | mainlib             |
| 4.26 | 1,6-OCTADIEN-3-OL,<br>3,7-DIMETHYL- | 13.71  | 921 | C10H18O           | 154              | 78-70-6 | WileyRegi<br>stry8e |

## Compound Structure

## Hit Spectrum

1,6-OCTADIEN-3-OL, 3,7-DIMETHYL-  
Formula C10H18O, MW 154, CAS# 78-70-6, Entry# 38740  
3,7-DIMETHYLOCTA-1,6-DIEN-3-OL

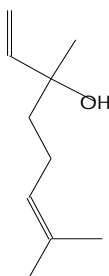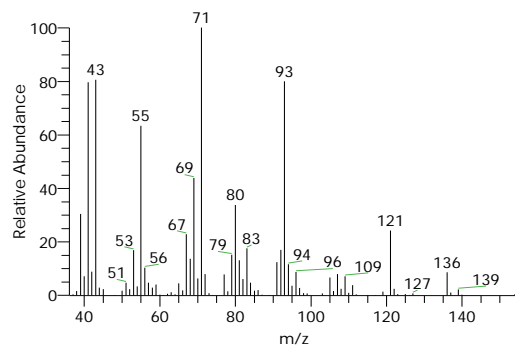

1,6-OCTADIEN-3-OL, 3,7-DIMETHYL-  
Formula C10H18O, MW 154, CAS# 78-70-6, Entry# 38753  
3,7-DIMETHYLOCTA-1,6-DIEN-3-OL

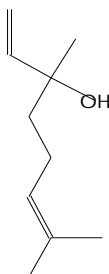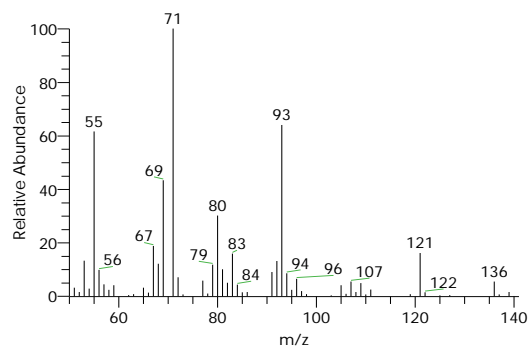

1,6-OCTADIEN-3-OL, 3,7-DIMETHYL-  
Formula C10H18O, MW 154, CAS# 78-70-6, Entry# 38714  
3,7-DIMETHYLOCTA-1,6-DIEN-3-OL

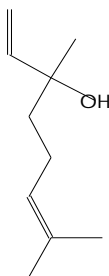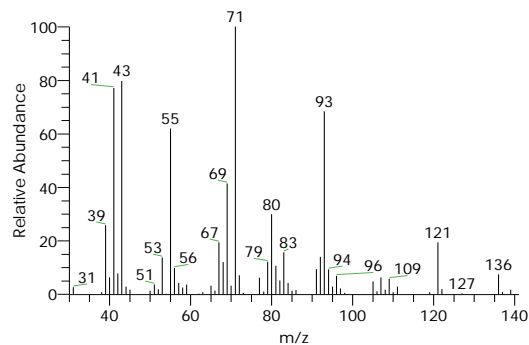

Linalool  
Formula C10H18O, MW 154, CAS# 78-70-6, Entry# 39161  
1,6-Octadien-3-ol, 3,7-dimethyl-

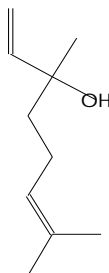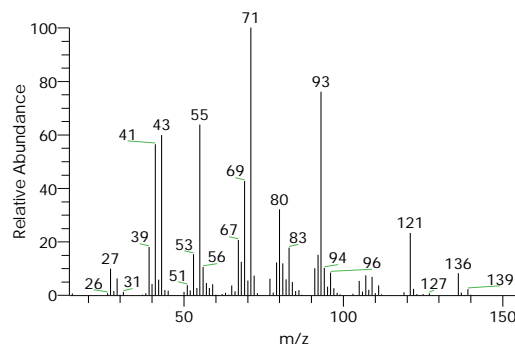

# My GC-MS Report

Compound Structure

Hit Spectrum

1,6-OCTADIEN-3-OL, 3,7-DIMETHYL-  
Formula C<sub>10</sub>H<sub>18</sub>O, MW 154, CAS# 78-70-6, Entry# 358563  
3,7-DIMETHYLOCTA-1,6-DIEN-3-OL

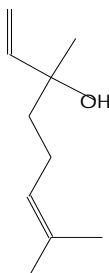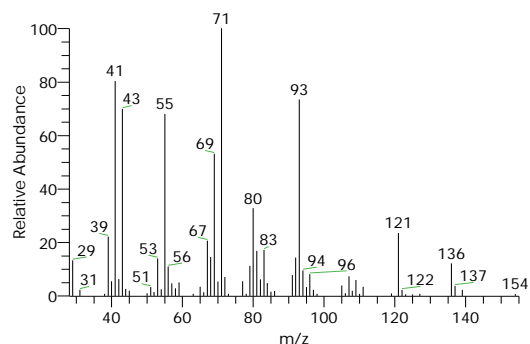

Lavender\_oil #150 RT: 4.50 AV: 1 NL: 3.57E7  
T: + c EI Full ms [50.000-750.000]

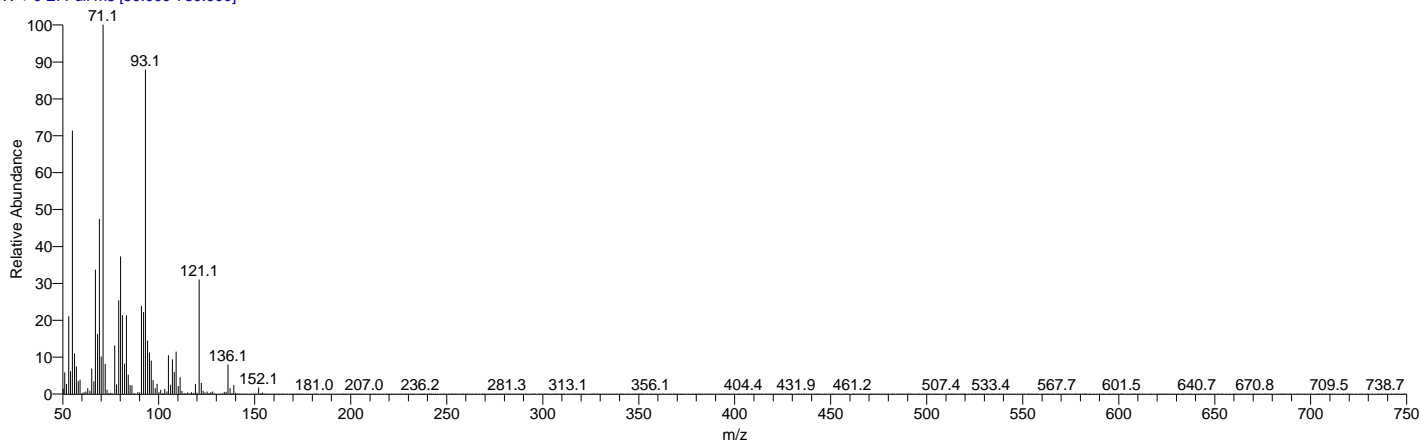

| RT   | Compound Name                    | Area % | MF  | Molecular Formula                 | Molecular Weight | Cas #   | Library             |
|------|----------------------------------|--------|-----|-----------------------------------|------------------|---------|---------------------|
| 4.50 | 1,6-OCTADIEN-3-OL, 3,7-DIMETHYL- | 0.25   | 929 | C <sub>10</sub> H <sub>18</sub> O | 154              | 78-70-6 | WileyRegi<br>stry8e |
| 4.50 | 1,6-OCTADIEN-3-OL, 3,7-DIMETHYL- | 0.25   | 913 | C <sub>10</sub> H <sub>18</sub> O | 154              | 78-70-6 | WileyRegi<br>stry8e |
| 4.50 | 1,6-OCTADIEN-3-OL, 3,7-DIMETHYL- | 0.25   | 908 | C <sub>10</sub> H <sub>18</sub> O | 154              | 78-70-6 | WileyRegi<br>stry8e |
| 4.50 | 1,6-OCTADIEN-3-OL, 3,7-DIMETHYL- | 0.25   | 905 | C <sub>10</sub> H <sub>18</sub> O | 154              | 78-70-6 | WileyRegi<br>stry8e |
| 4.50 | 1,6-OCTADIEN-3-OL, 3,7-DIMETHYL- | 0.25   | 912 | C <sub>10</sub> H <sub>18</sub> O | 154              | 78-70-6 | WileyRegi<br>stry8e |

Compound Structure

Hit Spectrum

1,6-OCTADIEN-3-OL, 3,7-DIMETHYL-  
Formula C<sub>10</sub>H<sub>18</sub>O, MW 154, CAS# 78-70-6, Entry# 38242  
3,7-DIMETHYLOCTA-1,6-DIEN-3-OL

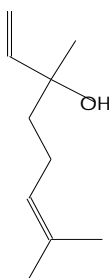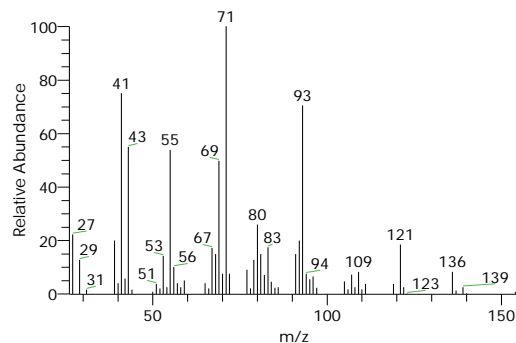

# My GC-MS Report

Compound Structure

Hit Spectrum

1,6-OCTADIEN-3-OL, 3,7-DIMETHYL-  
Formula C<sub>10</sub>H<sub>18</sub>O, MW 154, CAS# 78-70-6, Entry# 38740  
3,7-DIMETHYLOCTA-1,6-DIEN-3-OL

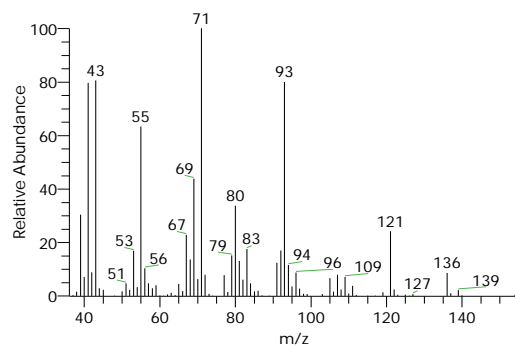

1,6-OCTADIEN-3-OL, 3,7-DIMETHYL-  
Formula C<sub>10</sub>H<sub>18</sub>O, MW 154, CAS# 78-70-6, Entry# 358563  
3,7-DIMETHYLOCTA-1,6-DIEN-3-OL

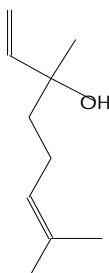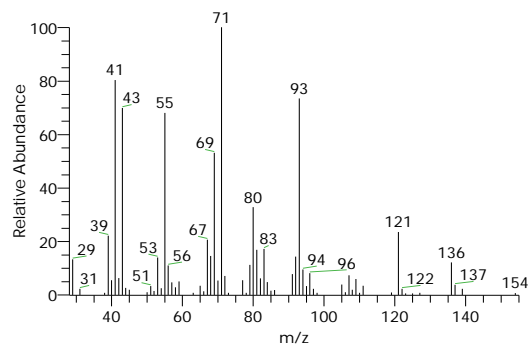

1,6-OCTADIEN-3-OL, 3,7-DIMETHYL-  
Formula C<sub>10</sub>H<sub>18</sub>O, MW 154, CAS# 78-70-6, Entry# 38239  
3,7-DIMETHYLOCTA-1,6-DIEN-3-OL

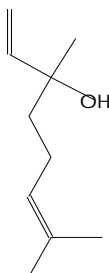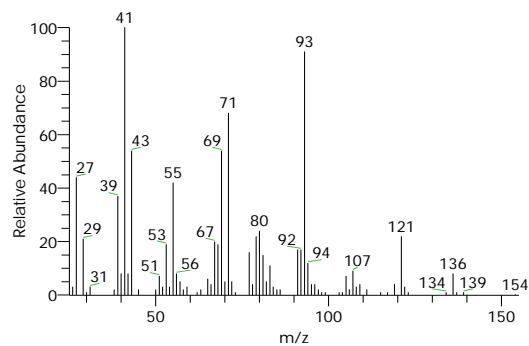

1,6-OCTADIEN-3-OL, 3,7-DIMETHYL-  
Formula C<sub>10</sub>H<sub>18</sub>O, MW 154, CAS# 78-70-6, Entry# 38753  
3,7-DIMETHYLOCTA-1,6-DIEN-3-OL

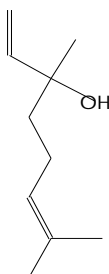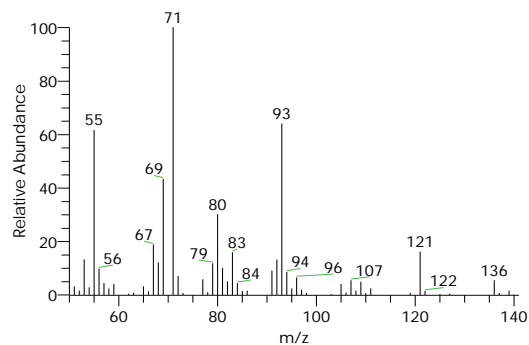

# My GC-MS Report

Lavender\_oil #357 RT: 5.19 AV: 1 NL: 2.54E7  
T: + c EI Full ms [50.000-750.000]

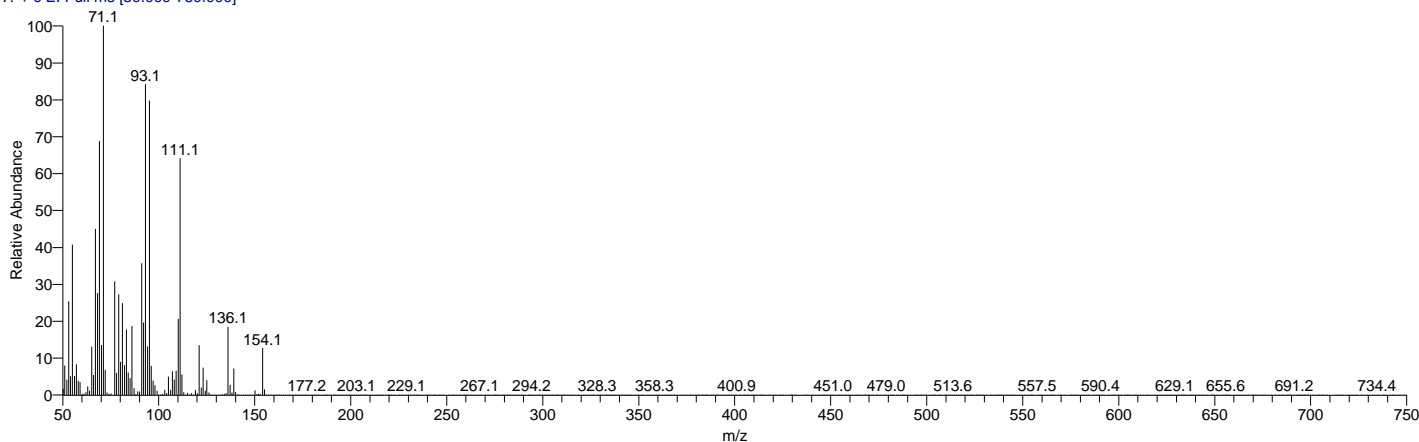

| RT   | Compound Name                                         | Area % | MF  | Molecular Formula | Molecular Weight | Cas #    | Library             |
|------|-------------------------------------------------------|--------|-----|-------------------|------------------|----------|---------------------|
| 5.19 | 3-CYCLOHEXEN-1-OL,<br>4-METHYL-1-(1-METHYLETHYL<br>)- | 0.46   | 874 | C10H18O           | 154              | 562-74-3 | WileyRegi<br>stry8e |
| 5.19 | 3-CYCLOHEXEN-1-OL,<br>4-METHYL-1-(1-METHYLETHYL<br>)- | 0.46   | 871 | C10H18O           | 154              | 562-74-3 | WileyRegi<br>stry8e |
| 5.19 | 3-CYCLOHEXEN-1-OL,<br>4-METHYL-1-(1-METHYLETHYL<br>)- | 0.46   | 869 | C10H18O           | 154              | 562-74-3 | WileyRegi<br>stry8e |
| 5.19 | Terpinen-4-ol                                         | 0.46   | 858 | C10H18O           | 154              | 562-74-3 | replib              |
| 5.19 | 1-ISOPROPYL-4-METHYL-3-CYC<br>LOHEXEN-1-OL            | 0.46   | 858 | C10H18O           | 154              | NA       | WileyRegi<br>stry8e |

Compound Structure

Hit Spectrum

3-CYCLOHEXEN-1-OL, 4-METHYL-1-(1-METHYLETHYL)-  
Formula C10H18O, MW 154, CAS# 562-74-3, Entry# 38345  
1-ISOPROPYL-4-METHYL-3-CYCLOHEXEN-1-OL #

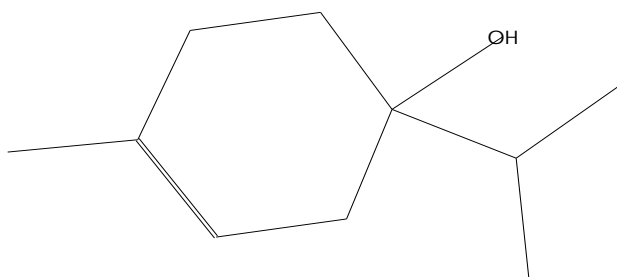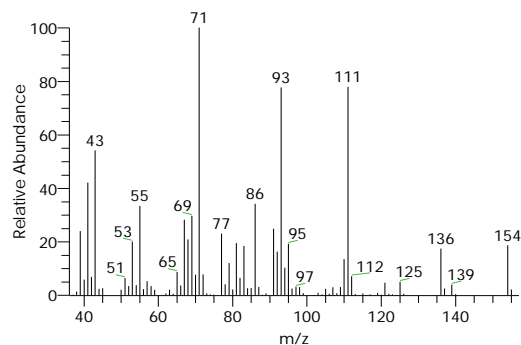

3-CYCLOHEXEN-1-OL, 4-METHYL-1-(1-METHYLETHYL)-  
Formula C10H18O, MW 154, CAS# 562-74-3, Entry# 38346  
1-ISOPROPYL-4-METHYL-3-CYCLOHEXEN-1-OL #

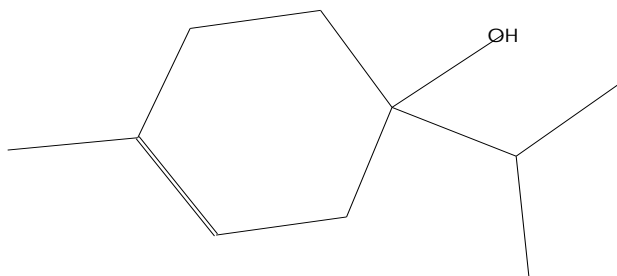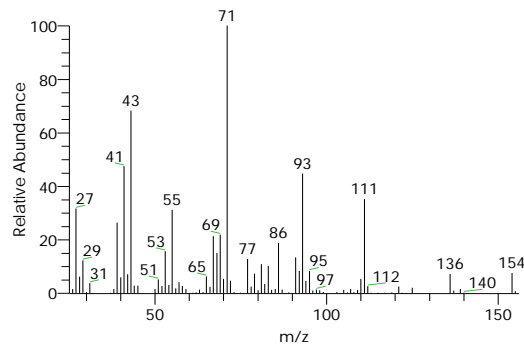

# My GC-MS Report

Compound Structure

Hit Spectrum

3-CYCLOHEXEN-1-OL, 4-METHYL-1-(1-METHYLETHYL)-  
 Formula C<sub>10</sub>H<sub>18</sub>O, MW 154, CAS# 562-74-3, Entry# 38347  
 1-ISOPROPYL-4-METHYL-3-CYCLOHEXEN-1-OL #

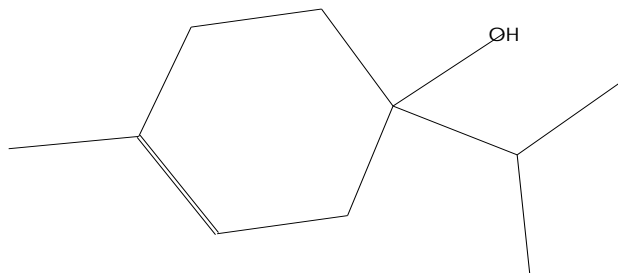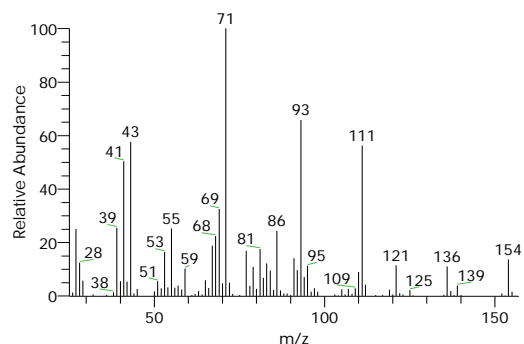

SI 853, RSI 858, replib, Entry# 9168, CAS# 562-74-3, Terpinen-4-ol

Terpinen-4-ol  
 Formula C<sub>10</sub>H<sub>18</sub>O, MW 154, CAS# 562-74-3, Entry# 9168  
 3-Cyclohexen-1-ol, 4-methyl-1-(1-methylethyl)-

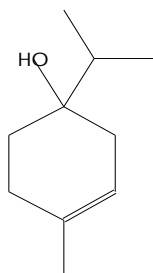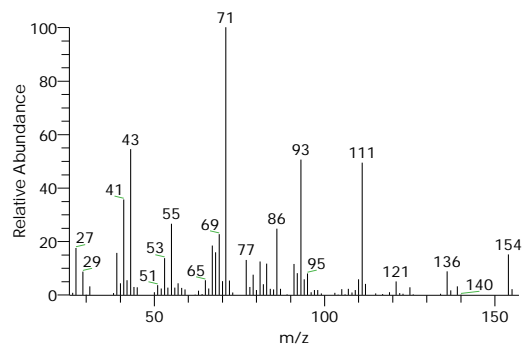

1-ISOPROPYL-4-METHYL-3-CYCLOHEXEN-1-OL  
 Formula C<sub>10</sub>H<sub>18</sub>O, MW 154, CAS# NA, Entry# 383374  
 4-TERPINEOL

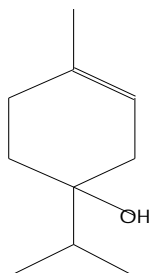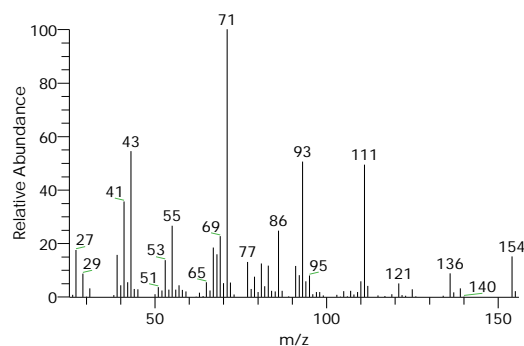

Lavender\_oil #455 RT: 5.52 AV: 1 NL: 1.13E8  
 T: + c EI Full ms [50.000-750.000]

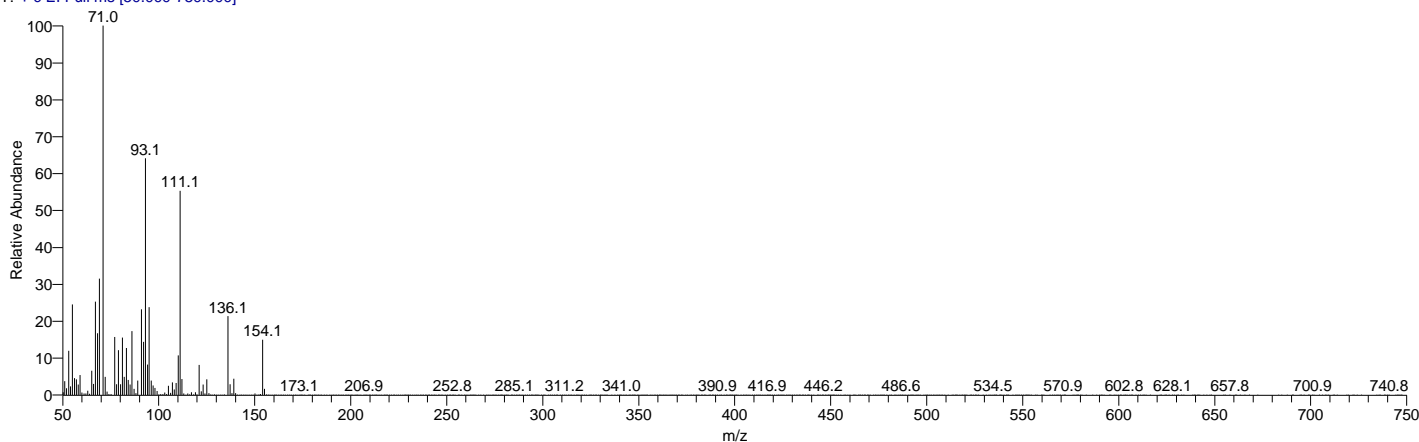

| RT   | Compound Name                                         | Area % | MF  | Molecular Formula                 | Molecular Weight | Cas #    | Library             |
|------|-------------------------------------------------------|--------|-----|-----------------------------------|------------------|----------|---------------------|
| 5.52 | 3-CYCLOHEXEN-1-OL,<br>4-METHYL-1-(1-METHYLETHYL<br>)- | 8.24   | 907 | C <sub>10</sub> H <sub>18</sub> O | 154              | 562-74-3 | WileyRegi<br>stry8e |

# My GC-MS Report

| RT   | Compound Name                                     | Area % | MF  | Molecular Formula | Molecular Weight | Cas #    | Library         |
|------|---------------------------------------------------|--------|-----|-------------------|------------------|----------|-----------------|
| 5.52 | 3-CYCLOHEXEN-1-OL,<br>4-METHYL-1-(1-METHYLETHYL)- | 8.24   | 892 | C10H18O           | 154              | 562-74-3 | WileyRegistry8e |
| 5.52 | 3-CYCLOHEXEN-1-OL,<br>4-METHYL-1-(1-METHYLETHYL)- | 8.24   | 888 | C10H18O           | 154              | 562-74-3 | WileyRegistry8e |
| 5.52 | 3-CYCLOHEXEN-1-OL,<br>4-METHYL-1-(1-METHYLETHYL)- | 8.24   | 882 | C10H18O           | 154              | 562-74-3 | WileyRegistry8e |
| 5.52 | 3-CYCLOHEXEN-1-OL,<br>4-METHYL-1-(1-METHYLETHYL)- | 8.24   | 881 | C10H18O           | 154              | 562-74-3 | WileyRegistry8e |

## Compound Structure

## Hit Spectrum

3-CYCLOHEXEN-1-OL, 4-METHYL-1-(1-METHYLETHYL)-  
Formula C10H18O, MW 154, CAS# 562-74-3, Entry# 38350  
1-ISOPROPYL-4-METHYL-3-CYCLOHEXEN-1-OL #

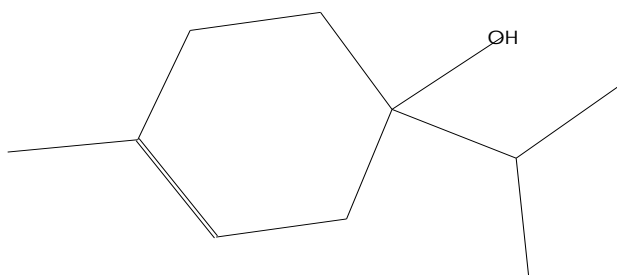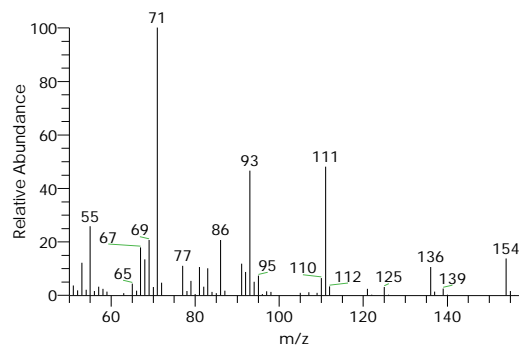

3-CYCLOHEXEN-1-OL, 4-METHYL-1-(1-METHYLETHYL)-  
Formula C10H18O, MW 154, CAS# 562-74-3, Entry# 38347  
1-ISOPROPYL-4-METHYL-3-CYCLOHEXEN-1-OL #

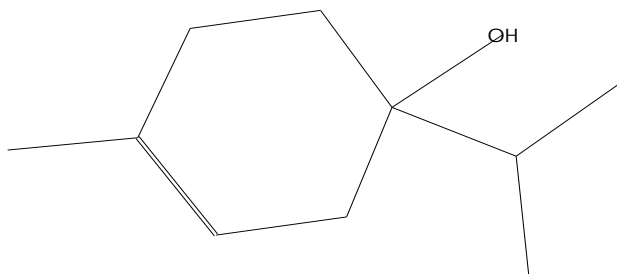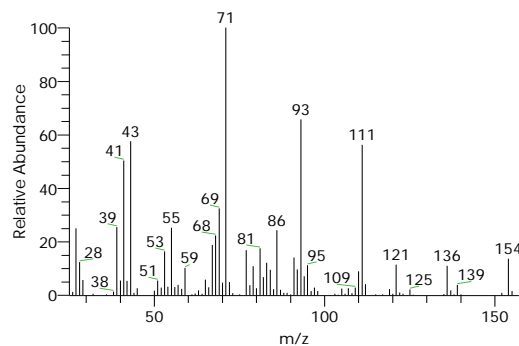

3-CYCLOHEXEN-1-OL, 4-METHYL-1-(1-METHYLETHYL)-  
Formula C10H18O, MW 154, CAS# 562-74-3, Entry# 38346  
1-ISOPROPYL-4-METHYL-3-CYCLOHEXEN-1-OL #

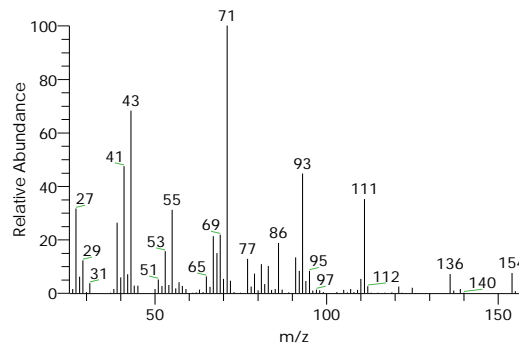

# My GC-MS Report

Compound Structure

Hit Spectrum

3-CYCLOHEXEN-1-OL, 4-METHYL-1-(1-METHYLETHYL)-  
 Formula C<sub>10</sub>H<sub>18</sub>O, MW 154, CAS# 562-74-3, Entry# 38348  
 1-ISOPROPYL-4-METHYL-3-CYCLOHEXEN-1-OL #

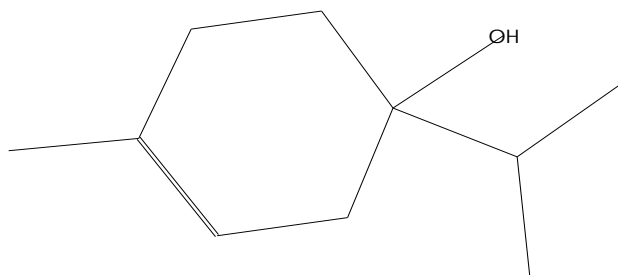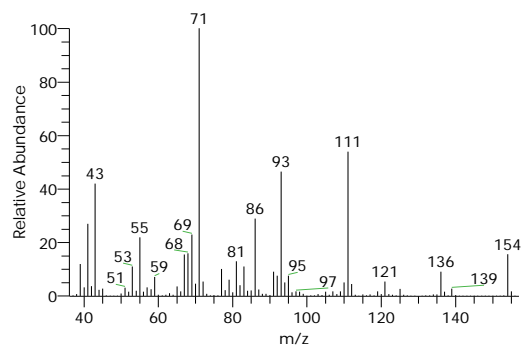

3-CYCLOHEXEN-1-OL, 4-METHYL-1-(1-METHYLETHYL)-  
 Formula C<sub>10</sub>H<sub>18</sub>O, MW 154, CAS# 562-74-3, Entry# 38345  
 1-ISOPROPYL-4-METHYL-3-CYCLOHEXEN-1-OL #

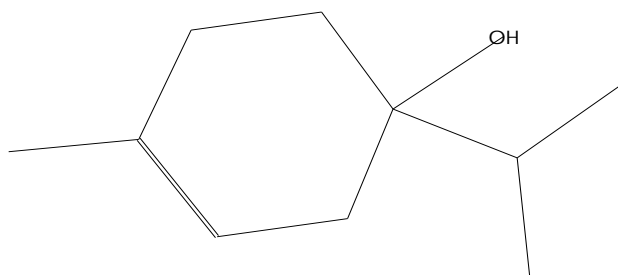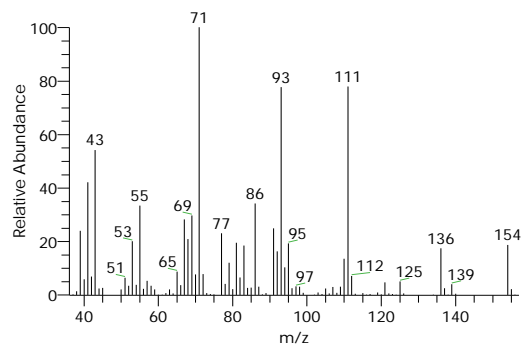

Lavender\_oil #565 RT: 5.89 AV: 1 NL: 2.16E7  
 T: + c EI Full ms [50.000-750.000]

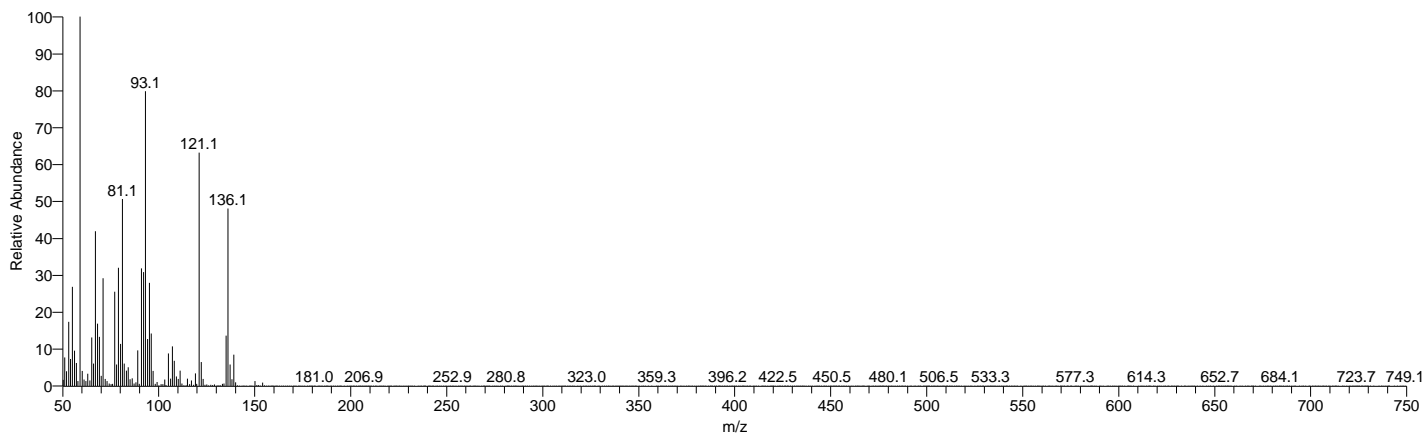

| RT   | Compound Name                                        | Area % | MF  | Molecular Formula                 | Molecular Weight | Cas #          | Library             |
|------|------------------------------------------------------|--------|-----|-----------------------------------|------------------|----------------|---------------------|
| 5.89 | L-à-Terpineol                                        | 0.70   | 875 | C <sub>10</sub> H <sub>18</sub> O | 154              | 10482-5<br>6-1 | replib              |
| 5.89 | à-Terpineol                                          | 0.70   | 912 | C <sub>10</sub> H <sub>18</sub> O | 154              | 98-55-5        | mainlib             |
| 5.89 | 3-CYCLOHEXENE-1-METHANOL<br>, à,à,4-TRIMETHYL-       | 0.70   | 882 | C <sub>10</sub> H <sub>18</sub> O | 154              | 98-55-5        | WileyRegi<br>stry8e |
| 5.89 | 3-CYCLOHEXENE-1-METHANOL<br>, à,à,4-TRIMETHYL-, (S)- | 0.70   | 893 | C <sub>10</sub> H <sub>18</sub> O | 154              | 10482-5<br>6-1 | WileyRegi<br>stry8e |
| 5.89 | (-)-(1S,2R,4R)-BETA-FENCHOL                          | 0.70   | 882 | C <sub>10</sub> H <sub>18</sub> O | 154              | 470-08<br>-6   | WileyRegi<br>stry8e |



# My GC-MS Report

Compound Structure

Hit Spectrum

L-à-Terpineol

Formula C<sub>10</sub>H<sub>18</sub>O, MW 154, CAS# 10482-56-1, Entry# 7441  
3-Cyclohexene-1-methanol, à,à,4-trimethyl-, (S)-

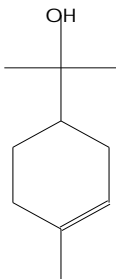

SI 866, RSI 875, replib, Entry# 7441, CAS# 10482-56-1, L-à-Terpineol

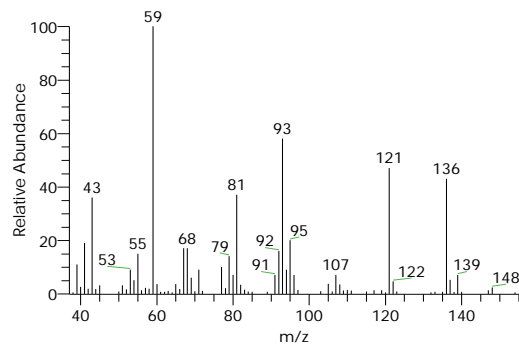

à-Terpineol

Formula C<sub>10</sub>H<sub>18</sub>O, MW 154, CAS# 98-55-5, Entry# 30324  
3-Cyclohexene-1-methanol, à,à,4-trimethyl-

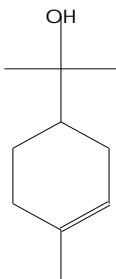

SI 863, RSI 912, mainlib, Entry# 30324, CAS# 98-55-5, à-Terpineol

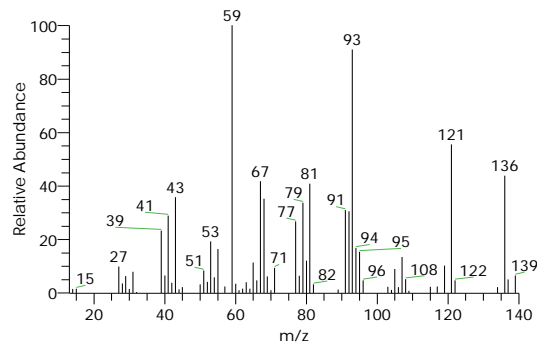

3-CYCLOHEXENE-1-METHANOL, à,à,4-TRIMETHYL-  
Formula C<sub>10</sub>H<sub>18</sub>O, MW 154, CAS# 98-55-5, Entry# 38365  
3-CYCLOHEXENE-1-METHANOL, à,à,4-TRIMETHYL-, (S)-

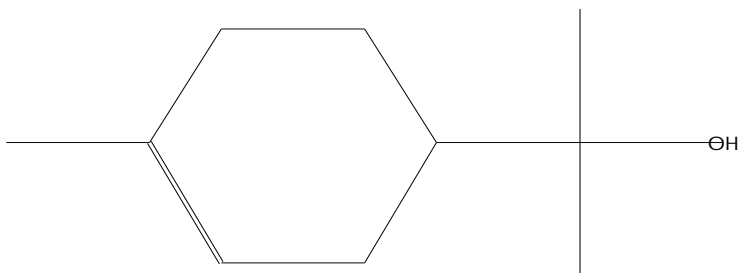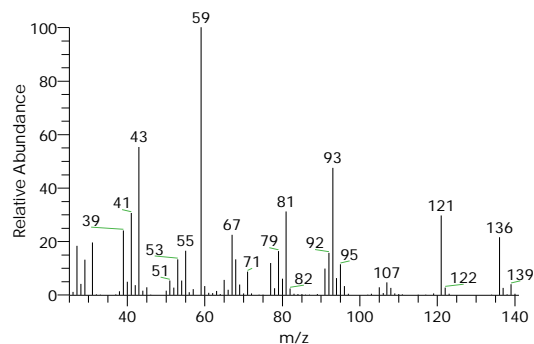

3-CYCLOHEXENE-1-METHANOL, à,à,4-TRIMETHYL-, (S)-  
Formula C<sub>10</sub>H<sub>18</sub>O, MW 154, CAS# 10482-56-1, Entry# 38377  
2-(4-METHYL-3-CYCLOHEXEN-1-YL)-2-PROPANOL #

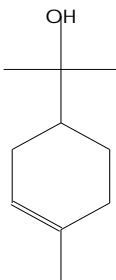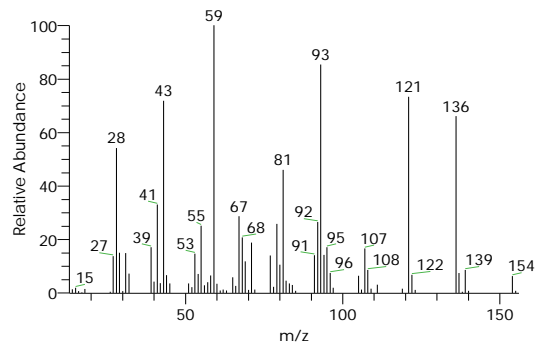

# My GC-MS Report

Compound Structure

Hit Spectrum

(-)-(1S,2R,4R)-BETA-FENCHOL  
Formula C<sub>10</sub>H<sub>18</sub>O, MW 154, CAS# 470-08-6, Entry# 38737  
(-)-BETA-FENCHOL

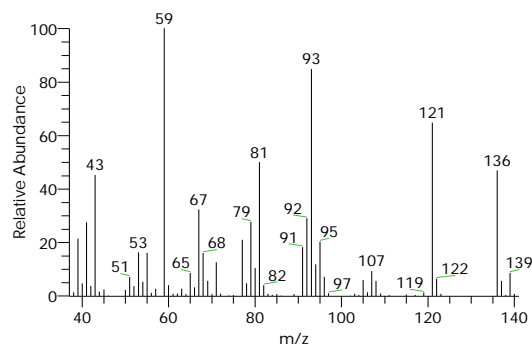

Lavender\_oil #860 RT: 6.88 AV: 1 NL: 2.43E8  
T: + c EI Full ms [50.000-750.000]

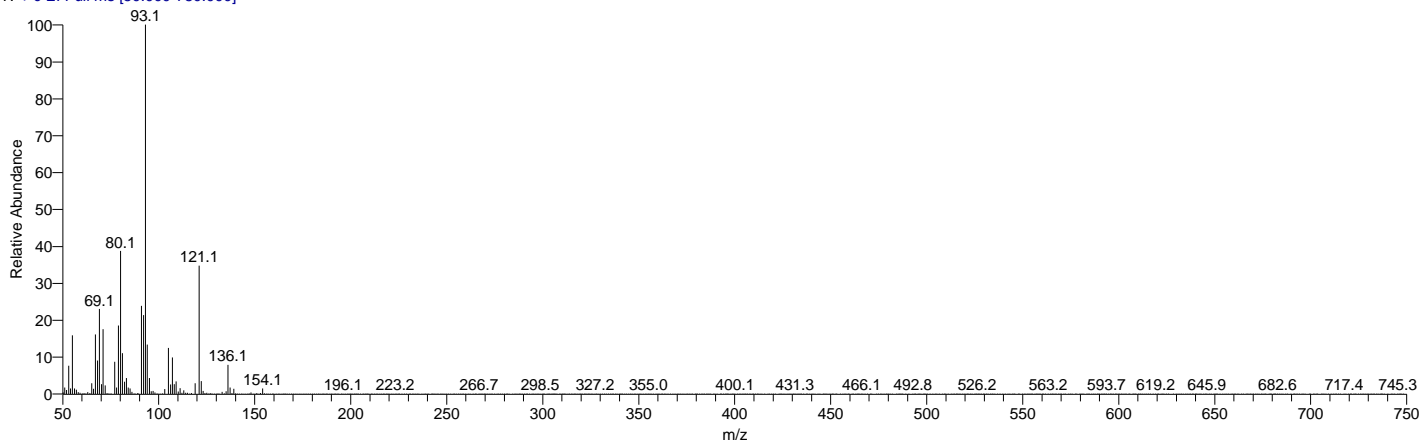

| RT   | Compound Name                                    | Area % | MF  | Molecular Formula                               | Molecular Weight | Cas #     | Library             |
|------|--------------------------------------------------|--------|-----|-------------------------------------------------|------------------|-----------|---------------------|
| 6.88 | 1,6-OCTADIEN-3-OL, 3,7-DIMETHYL-, ACETATE        | 6.10   | 950 | C <sub>12</sub> H <sub>20</sub> O <sub>2</sub>  | 196              | 115-95-7  | WileyRegi<br>stry8e |
| 6.88 | 1,5-DIMETHYL-1-VINYL-4-HEXENYL 2-AMINOBENZOATE # | 6.10   | 949 | C <sub>17</sub> H <sub>23</sub> NO <sub>2</sub> | 273              | 7149-26-0 | WileyRegi<br>stry8e |
| 6.88 | Linalyl acetate                                  | 6.10   | 943 | C <sub>12</sub> H <sub>20</sub> O <sub>2</sub>  | 196              | 115-95-7  | mainlib             |
| 6.88 | 1,6-OCTADIEN-3-OL, 3,7-DIMETHYL-, ACETATE        | 6.10   | 947 | C <sub>12</sub> H <sub>20</sub> O <sub>2</sub>  | 196              | 115-95-7  | WileyRegi<br>stry8e |
| 6.88 | 1,6-OCTADIEN-3-OL, 3,7-DIMETHYL-, ACETATE        | 6.10   | 940 | C <sub>12</sub> H <sub>20</sub> O <sub>2</sub>  | 196              | 115-95-7  | WileyRegi<br>stry8e |

Compound Structure

Hit Spectrum

1,6-OCTADIEN-3-OL, 3,7-DIMETHYL-, ACETATE  
Formula C<sub>12</sub>H<sub>20</sub>O<sub>2</sub>, MW 196, CAS# 115-95-7, Entry# 80154  
(1)-1,5-DIMETHYL-1-VINYLBENYL ACETATE

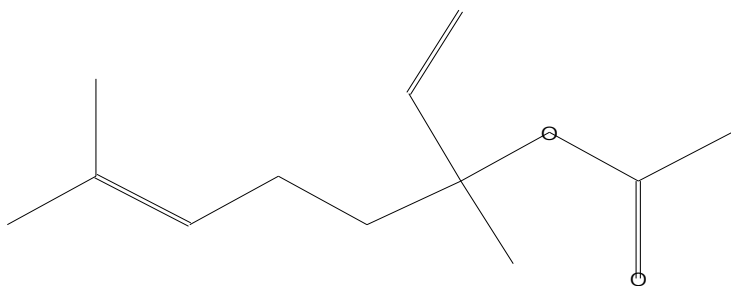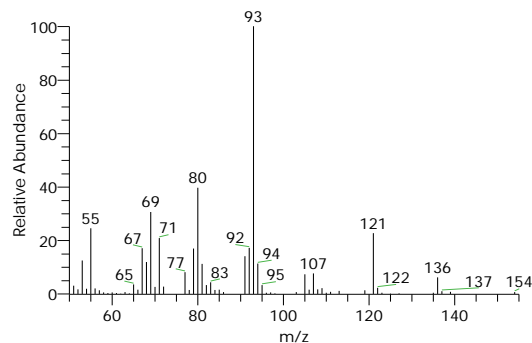

# My GC-MS Report

Compound Structure

Hit Spectrum

1,5-DIMETHYL-1-VINYL-4-HEXENYL 2-AMINOBENZOATE #  
Formula C<sub>17</sub>H<sub>23</sub>NO<sub>2</sub>, MW 273, CAS# 7149-26-0, Entry# 163952  
1,6-OCTADIEN-3-OL, 3,7-DIMETHYL-, 2-AMINOBENZOATE

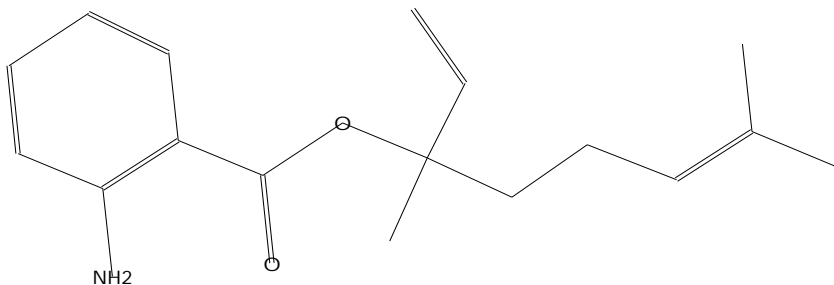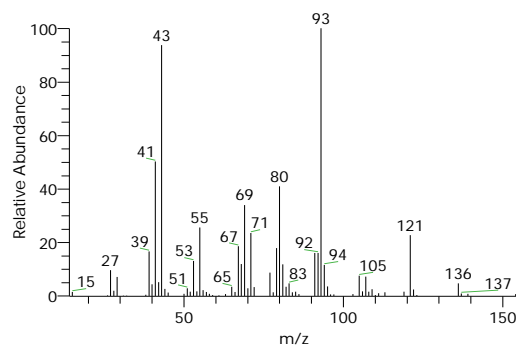

Linalyl acetate  
Formula C<sub>12</sub>H<sub>20</sub>O<sub>2</sub>, MW 196, CAS# 115-95-7, Entry# 65823  
1,6-Octadien-3-ol, 3,7-dimethyl-, acetate

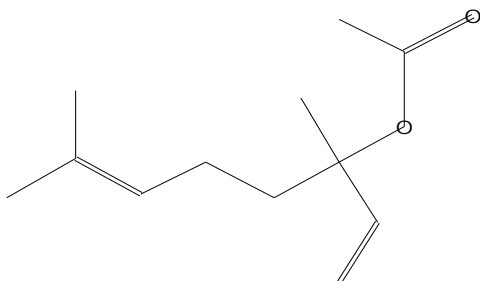

SI 941, RSI 943, mainlib, Entry# 65823, CAS# 115-95-7, Linalyl acetate

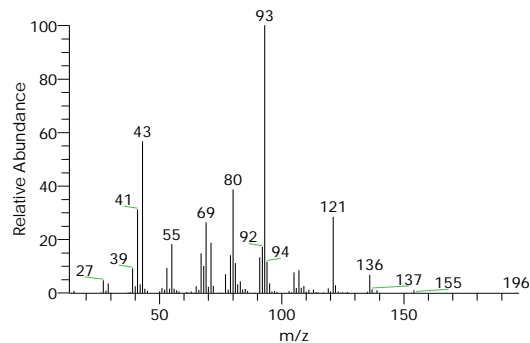

1,6-OCTADIEN-3-OL, 3,7-DIMETHYL-, ACETATE  
Formula C<sub>12</sub>H<sub>20</sub>O<sub>2</sub>, MW 196, CAS# 115-95-7, Entry# 80128  
(1)-1,5-DIMETHYL-1-VINYLHEX-4-ENYL ACETATE

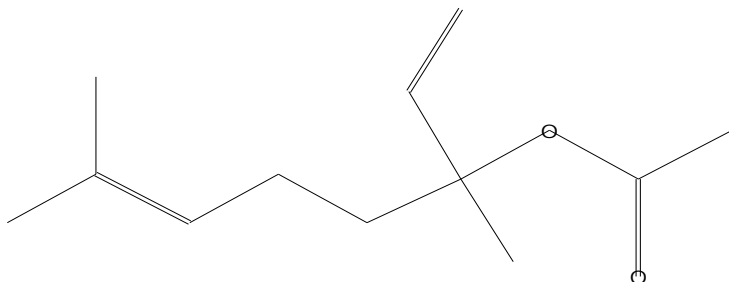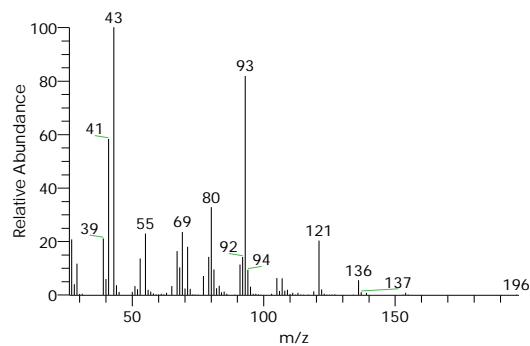

1,6-OCTADIEN-3-OL, 3,7-DIMETHYL-, ACETATE  
Formula C<sub>12</sub>H<sub>20</sub>O<sub>2</sub>, MW 196, CAS# 115-95-7, Entry# 80148  
(1)-1,5-DIMETHYL-1-VINYLHEX-4-ENYL ACETATE

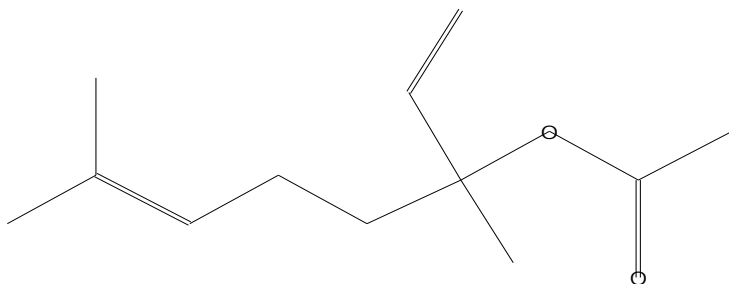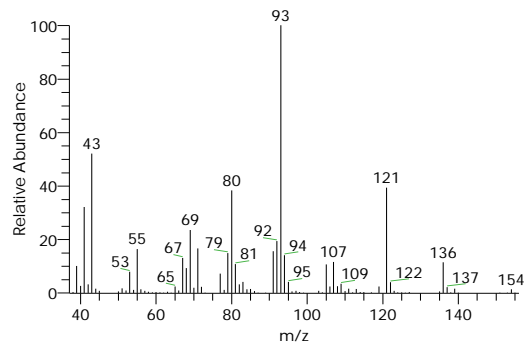

# My GC-MS Report

Lavender\_oil #931 RT: 7.12 AV: 1 NL: 4.78E8  
T: + c EI Full ms [50.000-750.000]

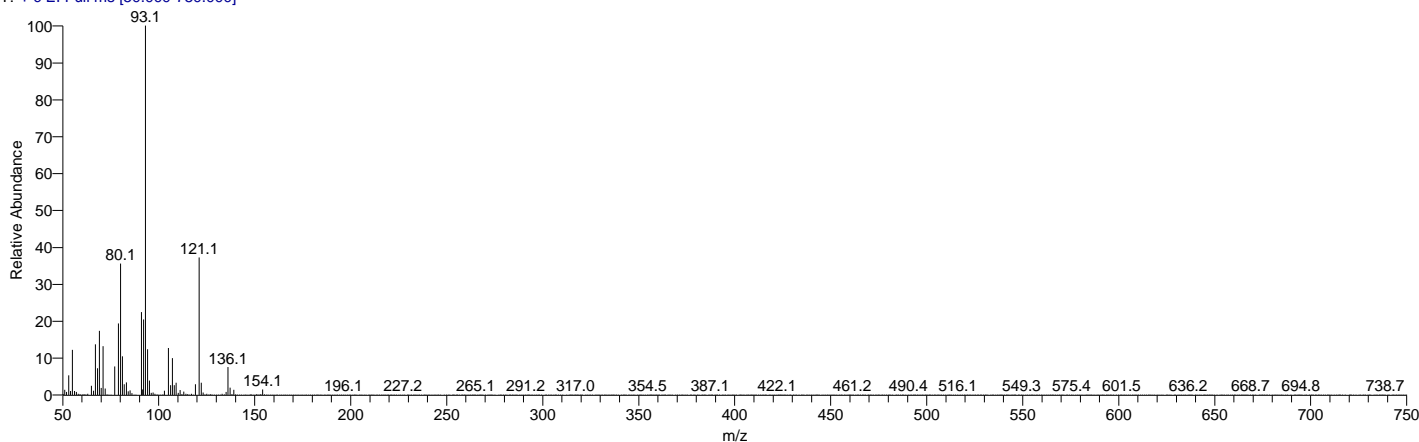

| RT   | Compound Name                                     | Area % | MF  | Molecular Formula | Molecular Weight | Cas #      | Library             |
|------|---------------------------------------------------|--------|-----|-------------------|------------------|------------|---------------------|
| 7.12 | 1,6-OCTADIEN-3-OL, 3,7-DIMETHYL-, ACETATE         | 0.56   | 939 | C12H20O2          | 196              | 115-95-7   | WileyRegi<br>stry8e |
| 7.12 | 1,6-OCTADIEN-3-OL, 3,7-DIMETHYL-, ACETATE         | 0.56   | 940 | C12H20O2          | 196              | 115-95-7   | WileyRegi<br>stry8e |
| 7.12 | Linalyl acetate                                   | 0.56   | 936 | C12H20O2          | 196              | 115-95-7   | mainlib             |
| 7.12 | 1,5-DIMETHYL-1-VINYL-4-HEXENYL 2-AMINO BENZOATE # | 0.56   | 936 | C17H23NO2         | 273              | 7149-2-6-0 | WileyRegi<br>stry8e |
| 7.12 | 1,6-OCTADIEN-3-OL, 3,7-DIMETHYL-, ACETATE         | 0.56   | 934 | C12H20O2          | 196              | 115-95-7   | WileyRegi<br>stry8e |

## Compound Structure

## Hit Spectrum

1,6-OCTADIEN-3-OL, 3,7-DIMETHYL-, ACETATE  
Formula C12H20O2, MW 196, CAS# 115-95-7, Entry# 80148  
(1)-1,5-DIMETHYL-1-VINYLHEX-4-ENYL ACETATE

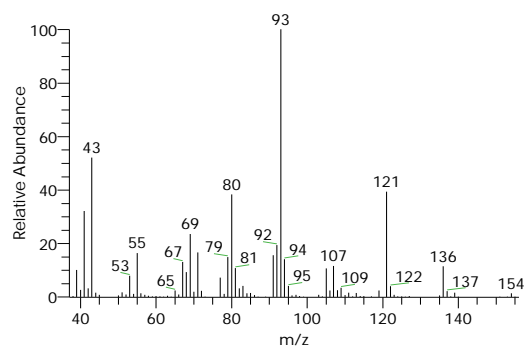

1,6-OCTADIEN-3-OL, 3,7-DIMETHYL-, ACETATE  
Formula C12H20O2, MW 196, CAS# 115-95-7, Entry# 80128  
(1)-1,5-DIMETHYL-1-VINYLHEX-4-ENYL ACETATE

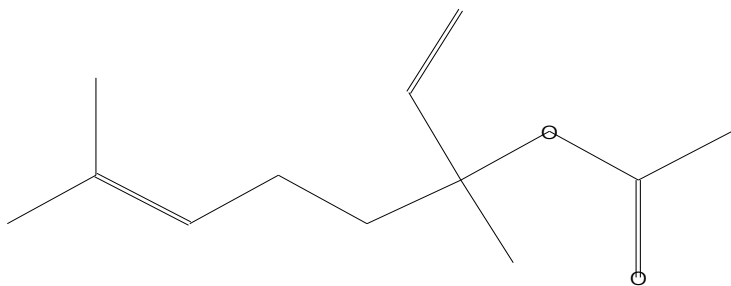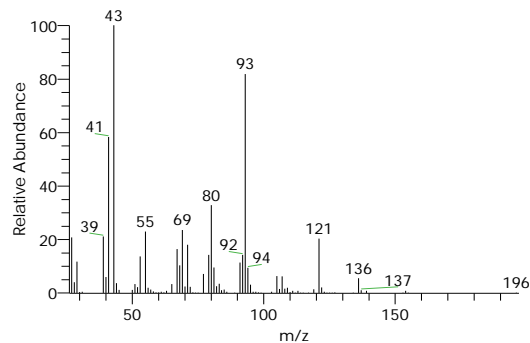

# My GC-MS Report

Compound Structure

Hit Spectrum

Linalyl acetate  
Formula C<sub>12</sub>H<sub>20</sub>O<sub>2</sub>, MW 196, CAS# 115-95-7, Entry# 65823  
1,6-Octadien-3-ol, 3,7-dimethyl-, acetate

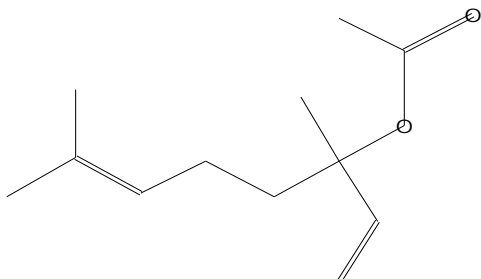

SI 935, RSI 936, mainlib, Entry# 65823, CAS# 115-95-7, Linalyl acetate

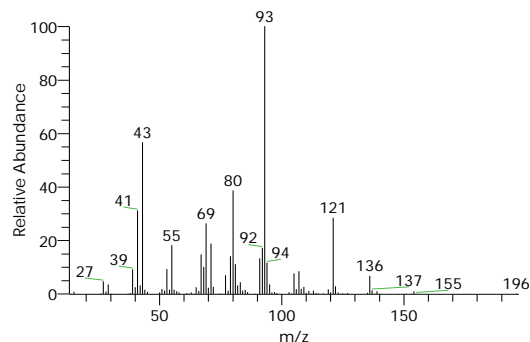

1,5-DIMETHYL-1-VINYL-4-HEXENYL 2-AMINOBENZOATE #  
Formula C<sub>17</sub>H<sub>23</sub>NO<sub>2</sub>, MW 273, CAS# 7149-26-0, Entry# 163952  
1,6-OCTADIEN-3-OL, 3,7-DIMETHYL-, 2-AMINOBENZOATE

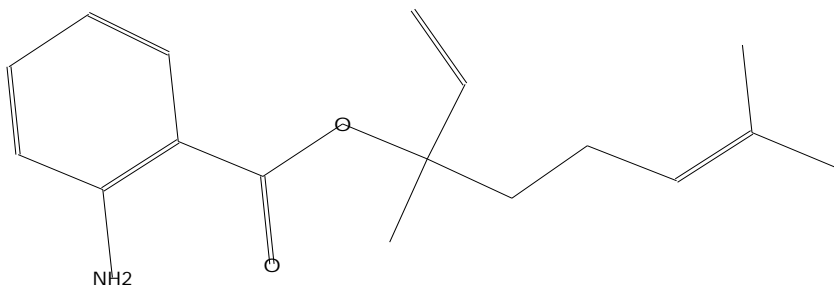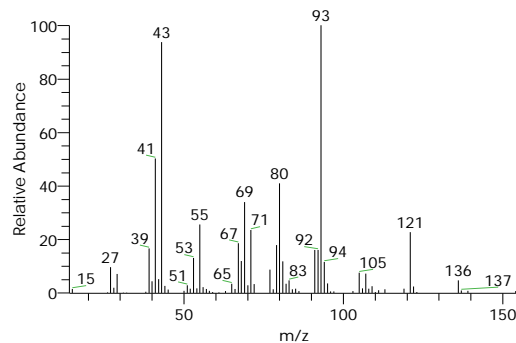

1,6-OCTADIEN-3-OL, 3,7-DIMETHYL-, ACETATE  
Formula C<sub>12</sub>H<sub>20</sub>O<sub>2</sub>, MW 196, CAS# 115-95-7, Entry# 80154  
(1)-1,5-DIMETHYL-1-VINYLHEX-4-ENYL ACETATE

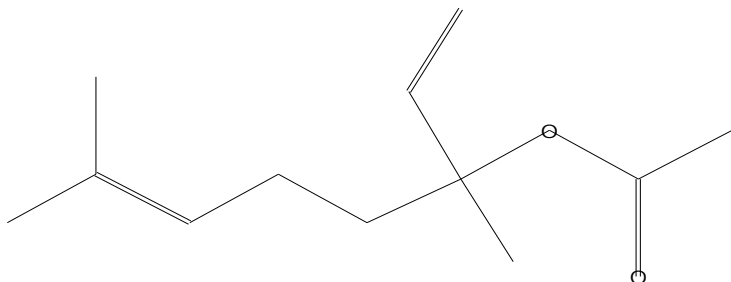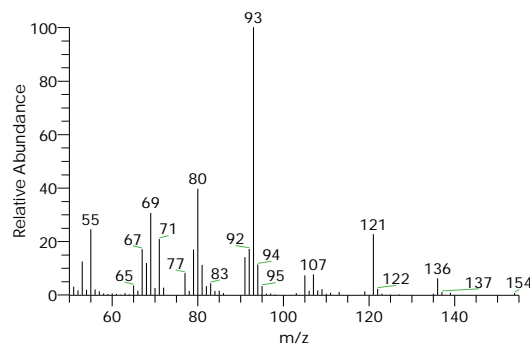

Lavender\_oil #994 RT: 7.33 AV: 1 NL: 6.03E8  
T: + c EI Full ms [50.000-750.000]

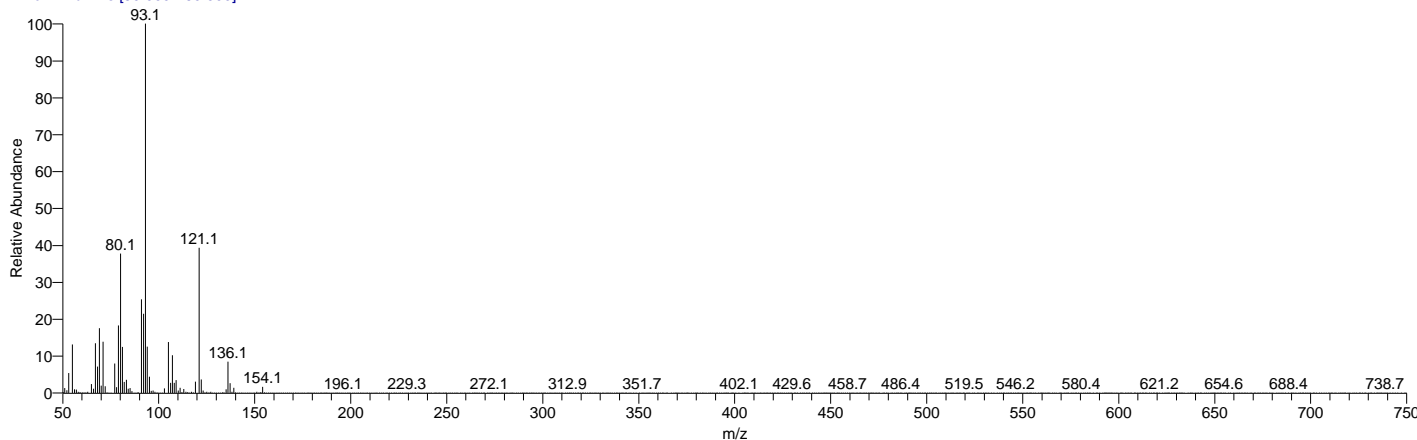

| RT   | Compound Name                                    | Area % | MF  | Molecular Formula                               | Molecular Weight | Cas #     | Library         |
|------|--------------------------------------------------|--------|-----|-------------------------------------------------|------------------|-----------|-----------------|
| 7.33 | 1,5-DIMETHYL-1-VINYL-4-HEXENYL 2-AMINOBENZOATE # | 21.92  | 934 | C <sub>17</sub> H <sub>23</sub> NO <sub>2</sub> | 273              | 7149-26-0 | WileyRegistry8e |
| 7.33 | 1,6-OCTADIEN-3-OL, 3,7-DIMETHYL-, ACETATE        | 21.92  | 933 | C <sub>12</sub> H <sub>20</sub> O <sub>2</sub>  | 196              | 115-95-7  | WileyRegistry8e |

# My GC-MS Report

| RT   | Compound Name                                | Area % | MF  | Molecular Formula | Molecular Weight | Cas #    | Library             |
|------|----------------------------------------------|--------|-----|-------------------|------------------|----------|---------------------|
| 7.33 | 1,6-OCTADIEN-3-OL,<br>3,7-DIMETHYL-, ACETATE | 21.92  | 928 | C12H20O2          | 196              | 115-95-7 | WileyRegi<br>stry8e |
| 7.33 | 1,6-OCTADIEN-3-OL,<br>3,7-DIMETHYL-, ACETATE | 21.92  | 926 | C12H20O2          | 196              | 115-95-7 | WileyRegi<br>stry8e |
| 7.33 | Linalyl acetate                              | 21.92  | 924 | C12H20O2          | 196              | 115-95-7 | mainlib<br>-7       |

## Compound Structure

## Hit Spectrum

1,5-DIMETHYL-1-VINYL-4-HEXENYL 2-AMINOBENZOATE #  
 Formula C17H23NO2, MW 273, CAS# 7149-26-0, Entry# 163952  
 1,6-OCTADIEN-3-OL, 3,7-DIMETHYL-, 2-AMINOBENZOATE

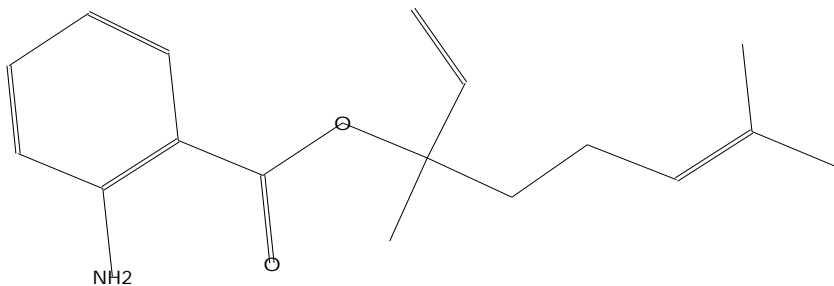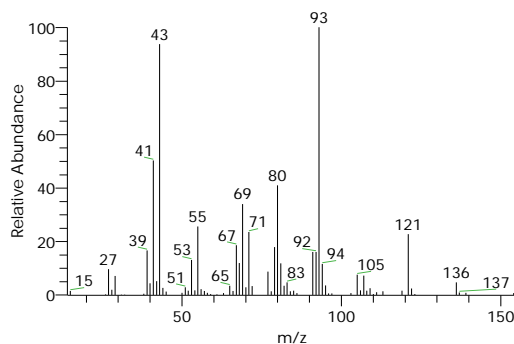

1,6-OCTADIEN-3-OL, 3,7-DIMETHYL-, ACETATE  
 Formula C12H20O2, MW 196, CAS# 115-95-7, Entry# 80128  
 (1)-1,5-DIMETHYL-1-VINYLHEX-4-ENYL ACETATE

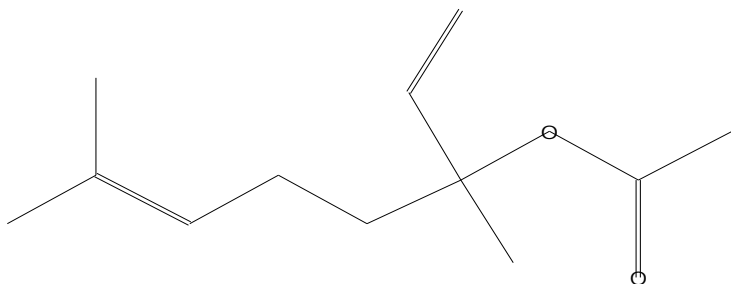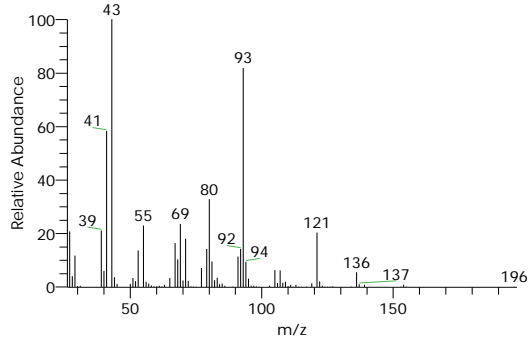

1,6-OCTADIEN-3-OL, 3,7-DIMETHYL-, ACETATE  
 Formula C12H20O2, MW 196, CAS# 115-95-7, Entry# 80154  
 (1)-1,5-DIMETHYL-1-VINYLHEX-4-ENYL ACETATE

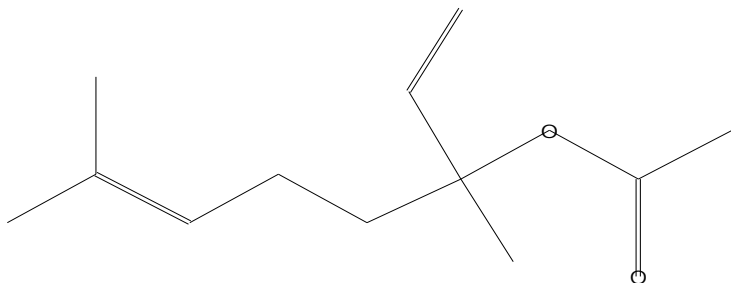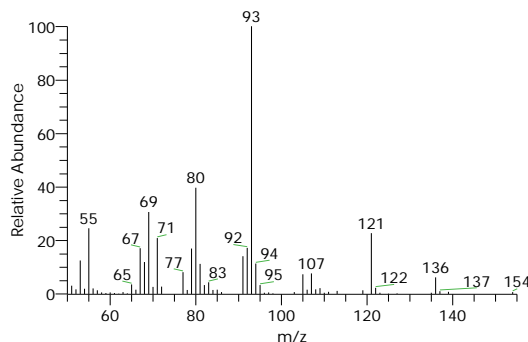

1,6-OCTADIEN-3-OL, 3,7-DIMETHYL-, ACETATE  
 Formula C12H20O2, MW 196, CAS# 115-95-7, Entry# 80148  
 (1)-1,5-DIMETHYL-1-VINYLHEX-4-ENYL ACETATE

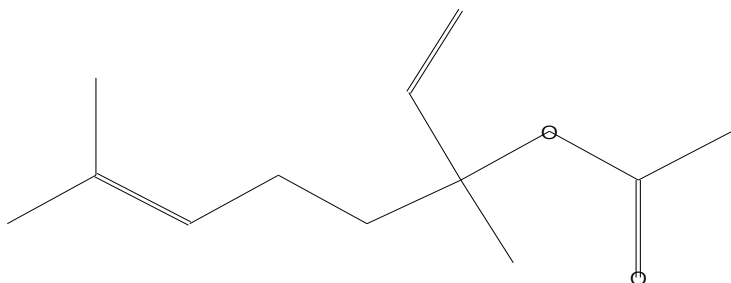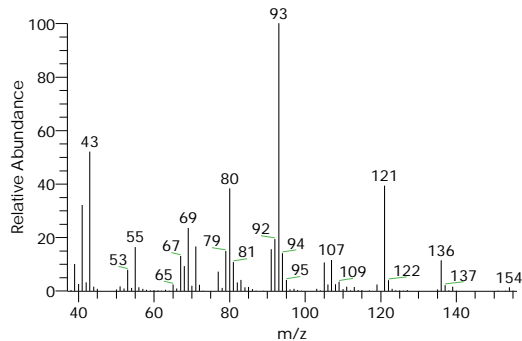

# My GC-MS Report

Compound Structure

Hit Spectrum

Linalyl acetate  
Formula C<sub>12</sub>H<sub>20</sub>O<sub>2</sub>, MW 196, CAS# 115-95-7, Entry# 65823  
1,6-Octadien-3-ol, 3,7-dimethyl-, acetate

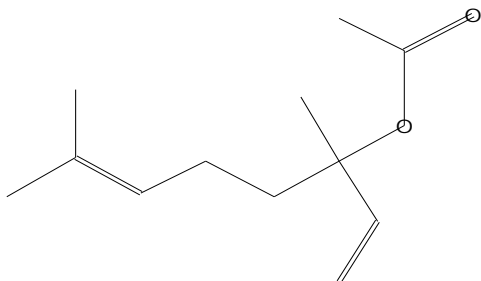

SI 924, RSI 924, mainlib, Entry# 65823, CAS# 115-95-7, Linalyl acetate



Lavender\_oil #1091 RT: 7.66 AV: 1 NL: 6.76E6  
T: + c EI Full ms [50.000-750.000]

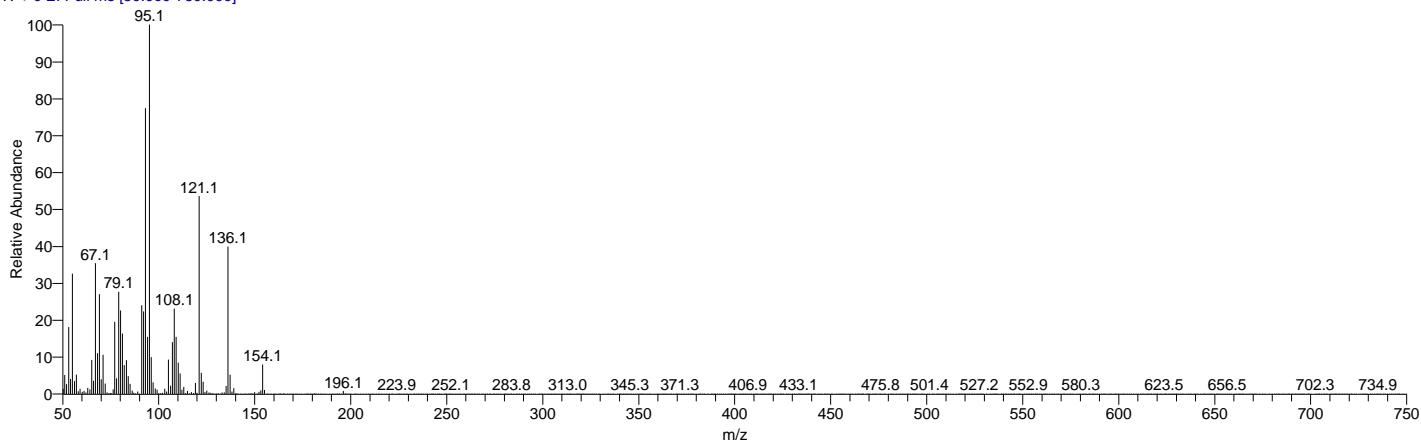

| RT   | Compound Name                                                    | Area % | MF  | Molecular Formula                              | Molecular Weight | Cas #    | Library         |
|------|------------------------------------------------------------------|--------|-----|------------------------------------------------|------------------|----------|-----------------|
| 7.66 | Bornyl acetate                                                   | 0.10   | 919 | C <sub>12</sub> H <sub>20</sub> O <sub>2</sub> | 196              | 76-49-3  | mainlib         |
| 7.66 | BICYCLO[2.2.1]HEPTAN-2-OL, 1,7,7-TRIMETHYL-, ACETATE, (1S-ENDO)- | 0.10   | 919 | C <sub>12</sub> H <sub>20</sub> O <sub>2</sub> | 196              | 5655-6   | WileyRegistry8e |
| 7.66 | BICYCLO[2.2.1]HEPTAN-2-OL, 1,7,7-TRIMETHYL-, ACETATE, ENDO-      | 0.10   | 912 | C <sub>12</sub> H <sub>20</sub> O <sub>2</sub> | 196              | 76-49-3  | WileyRegistry8e |
| 7.66 | BICYCLO[2.2.1]HEPTAN-2-OL, 1,7,7-TRIMETHYL-, ACETATE, EXO-       | 0.10   | 914 | C <sub>12</sub> H <sub>20</sub> O <sub>2</sub> | 196              | 125-12-2 | WileyRegistry8e |
| 7.66 | BICYCLO[2.2.1]HEPTAN-2-OL, 1,7,7-TRIMETHYL-, ACETATE, ENDO-      | 0.10   | 914 | C <sub>12</sub> H <sub>20</sub> O <sub>2</sub> | 196              | 76-49-3  | WileyRegistry8e |

Compound Structure

Hit Spectrum

Bornyl acetate  
Formula C<sub>12</sub>H<sub>20</sub>O<sub>2</sub>, MW 196, CAS# 76-49-3, Entry# 67808  
Bicyclo[2.2.1]heptan-2-ol, 1,7,7-trimethyl-, acetate, endo-

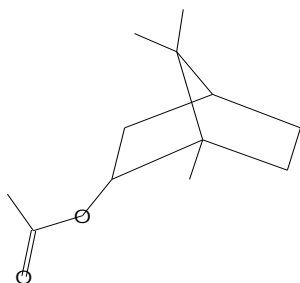

SI 917, RSI 919, mainlib, Entry# 67808, CAS# 76-49-3, Bornyl acetate

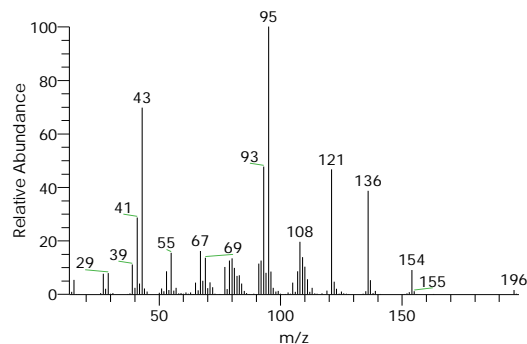

# My GC-MS Report

Compound Structure

Hit Spectrum

BICYCLO[2.2.1]HEPTAN-2-OL, 1,7,7-TRIMETHYL-, ACETATE, (1S-ENDO)-  
Formula C<sub>12</sub>H<sub>20</sub>O<sub>2</sub>, MW 196, CAS# 5655-61-8, Entry# 80072  
1,7,7-TRIMETHYLBICYCLO[2.2.1]HEPT-2-YL ACETATE #

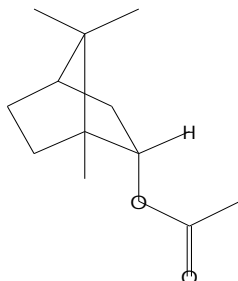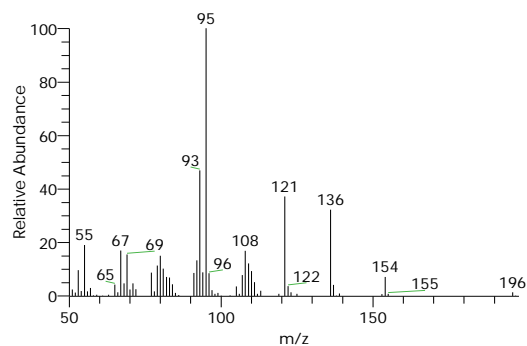

BICYCLO[2.2.1]HEPTAN-2-OL, 1,7,7-TRIMETHYL-, ACETATE, ENDO-  
Formula C<sub>12</sub>H<sub>20</sub>O<sub>2</sub>, MW 196, CAS# 76-49-3, Entry# 80076  
1,7,7-TRIMETHYLBICYCLO[2.2.1]HEPT-2-YL ACETATE #

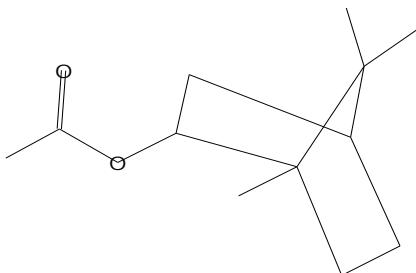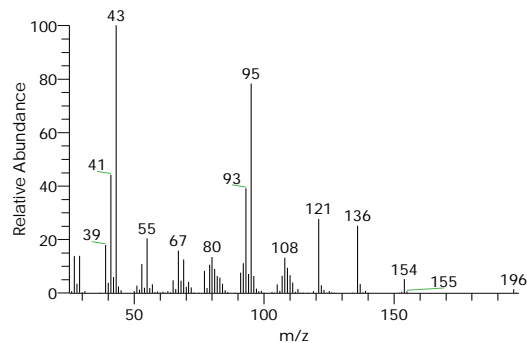

BICYCLO[2.2.1]HEPTAN-2-OL, 1,7,7-TRIMETHYL-, ACETATE, EXO-  
Formula C<sub>12</sub>H<sub>20</sub>O<sub>2</sub>, MW 196, CAS# 125-12-2, Entry# 80091  
1,7,7-TRIMETHYLBICYCLO[2.2.1]HEPT-2-YL ACETATE #

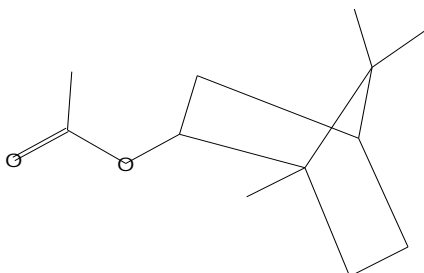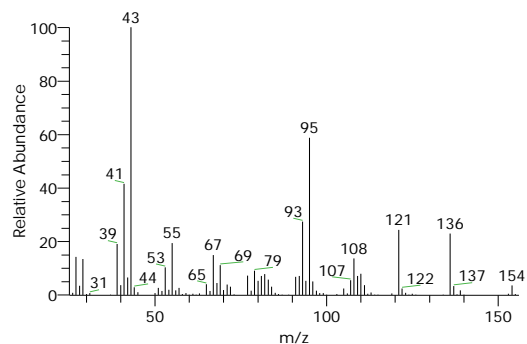

BICYCLO[2.2.1]HEPTAN-2-OL, 1,7,7-TRIMETHYL-, ACETATE, ENDO-  
Formula C<sub>12</sub>H<sub>20</sub>O<sub>2</sub>, MW 196, CAS# 76-49-3, Entry# 80082  
1,7,7-TRIMETHYLBICYCLO[2.2.1]HEPT-2-YL ACETATE #

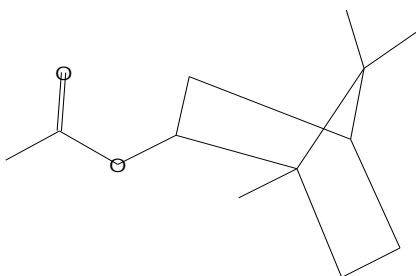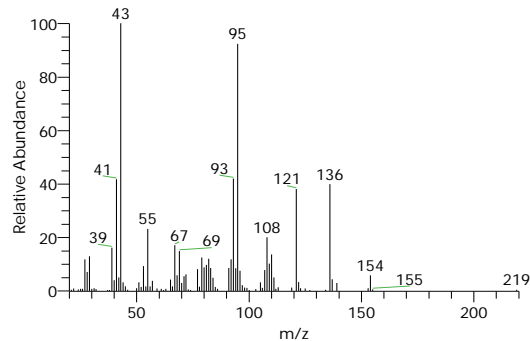



# My GC-MS Report

Lavender\_oil #1160 RT: 7.89 AV: 1 NL: 2.20E8  
T: + c EI Full ms [50.000-750.000]

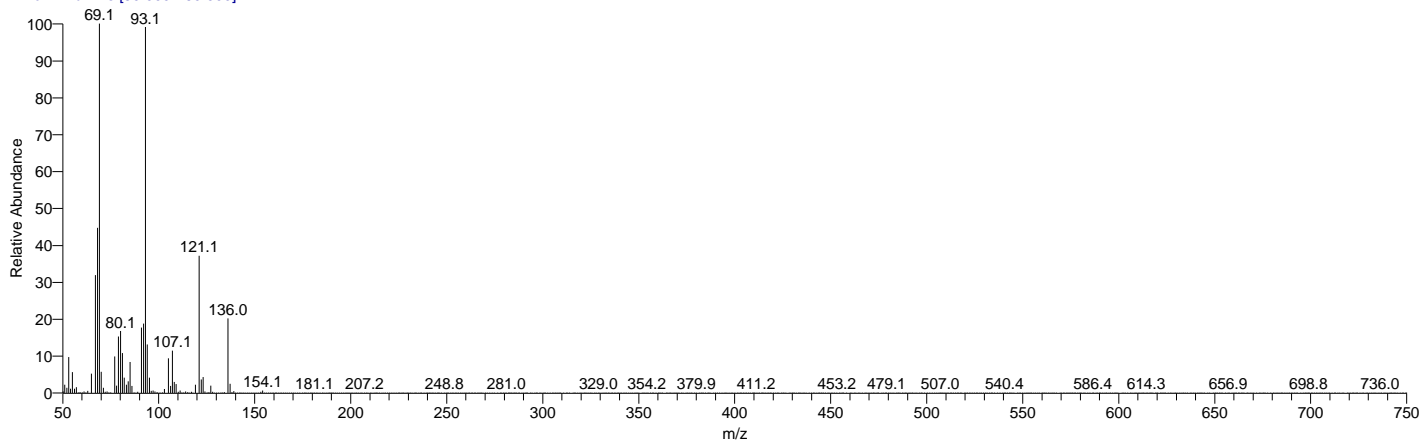

| RT   | Compound Name                                        | Area % | MF  | Molecular Formula                              | Molecular Weight | Cas #      | Library         |
|------|------------------------------------------------------|--------|-----|------------------------------------------------|------------------|------------|-----------------|
| 7.89 | 4-Hexen-1-ol, 5-methyl-2-(1-methylethenyl)-, acetate | 11.85  | 940 | C <sub>12</sub> H <sub>20</sub> O <sub>2</sub> | 196              | 25905-14-0 | mainlib         |
| 7.89 | 4-HEXEN-1-OL, 2-ISOPROPENYL-5-METHYL-, ACETATE       | 11.85  | 946 | C <sub>12</sub> H <sub>20</sub> O <sub>2</sub> | 196              | 25905-14-0 | WileyRegistry8e |
| 7.89 | 4-Hexen-1-ol, 5-methyl-2-(1-methylethenyl)-, acetate | 11.85  | 905 | C <sub>12</sub> H <sub>20</sub> O <sub>2</sub> | 196              | 25905-14-0 | replib          |
| 7.89 | 2,6-OCTADIEN-1-OL, 3,7-DIMETHYL-, ACETATE            | 11.85  | 892 | C <sub>12</sub> H <sub>20</sub> O <sub>2</sub> | 196              | 105-87-3   | WileyRegistry8e |
| 7.89 | 2,6-OCTADIEN-1-OL, 3,7-DIMETHYL-, ACETATE            | 11.85  | 887 | C <sub>12</sub> H <sub>20</sub> O <sub>2</sub> | 196              | 105-87-3   | WileyRegistry8e |

## Compound Structure

## Hit Spectrum

4-Hexen-1-ol, 5-methyl-2-(1-methylethenyl)-, acetate  
Formula C<sub>12</sub>H<sub>20</sub>O<sub>2</sub>, MW 196, CAS# 25905-14-0, Entry# 35656  
2-Isopropenyl-5-methyl-4-hexenyl acetate #

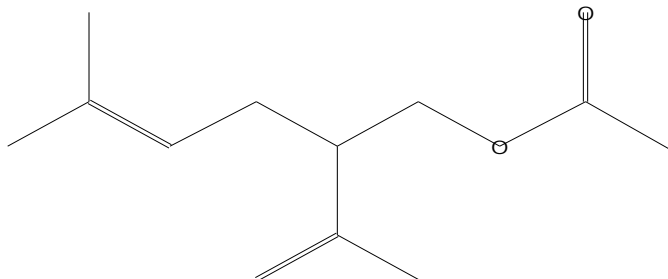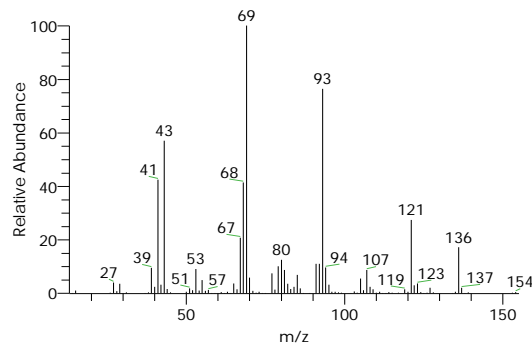

4-HEXEN-1-OL, 2-ISOPROPENYL-5-METHYL-, ACETATE  
Formula C<sub>12</sub>H<sub>20</sub>O<sub>2</sub>, MW 196, CAS# 25905-14-0, Entry# 80143  
2-ISOPROPENYL-5-METHYL-4-HEXENYL ACETATE #

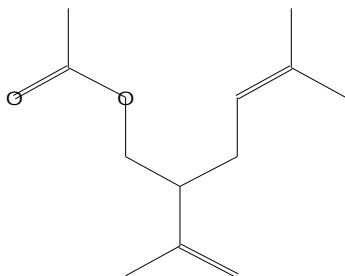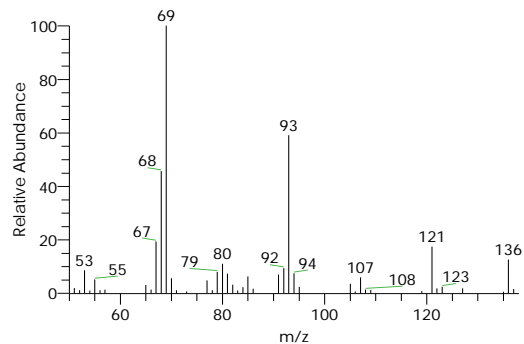

# My GC-MS Report

Compound Structure

Hit Spectrum

4-Hexen-1-ol, 5-methyl-2-(1-methylethenyl)-, acetate  
 Formula C<sub>12</sub>H<sub>20</sub>O<sub>2</sub>, MW 196, CAS# 25905-14-0, Entry# 8604  
 2-Isopropenyl-5-methyl-4-hexenyl acetate #

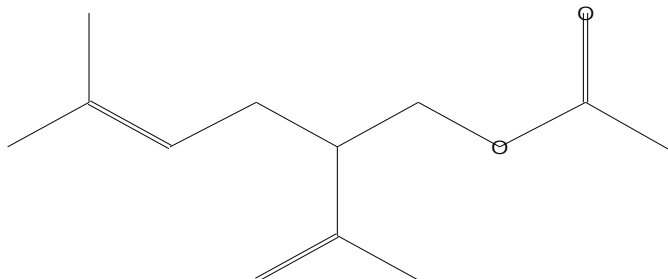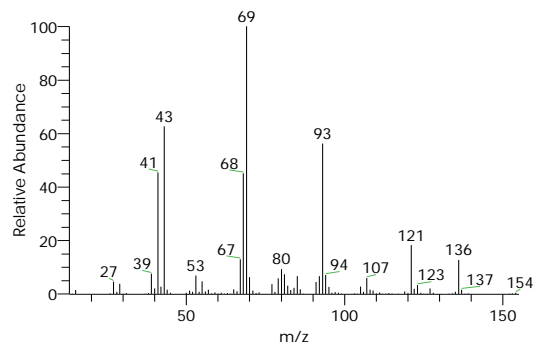

2,6-OCTADIEN-1-OL, 3,7-DIMETHYL-, ACETATE  
 Formula C<sub>12</sub>H<sub>20</sub>O<sub>2</sub>, MW 196, CAS# 105-87-3, Entry# 79958  
 2,6-OCTADIEN-1-OL, 3,7-DIMETHYL-, ACETATE, (E)-

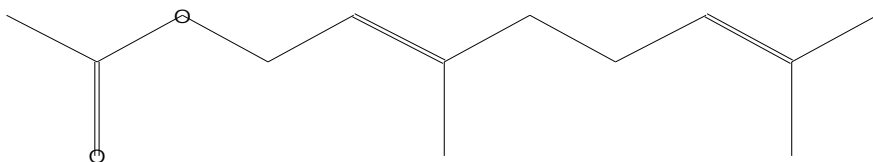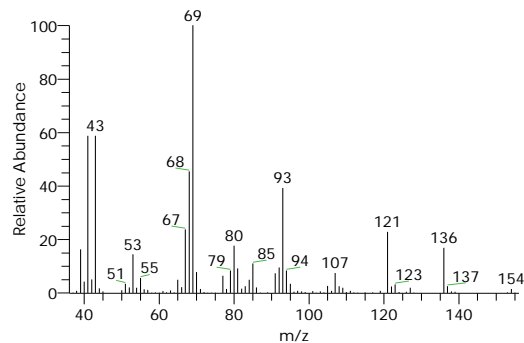

2,6-OCTADIEN-1-OL, 3,7-DIMETHYL-, ACETATE  
 Formula C<sub>12</sub>H<sub>20</sub>O<sub>2</sub>, MW 196, CAS# 105-87-3, Entry# 79954  
 2,6-OCTADIEN-1-OL, 3,7-DIMETHYL-, ACETATE, (E)-

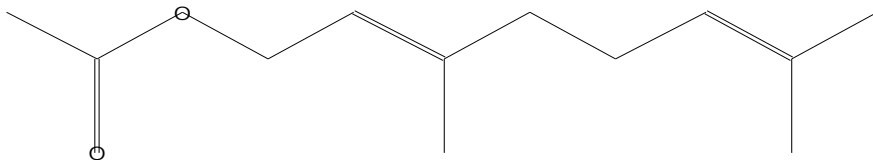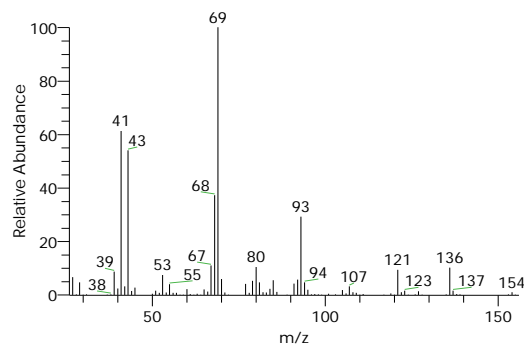

Lavender\_oil #1635 RT: 9.48 AV: 1 NL: 1.95E7  
 T: + c EI Full ms [50.000-750.000]

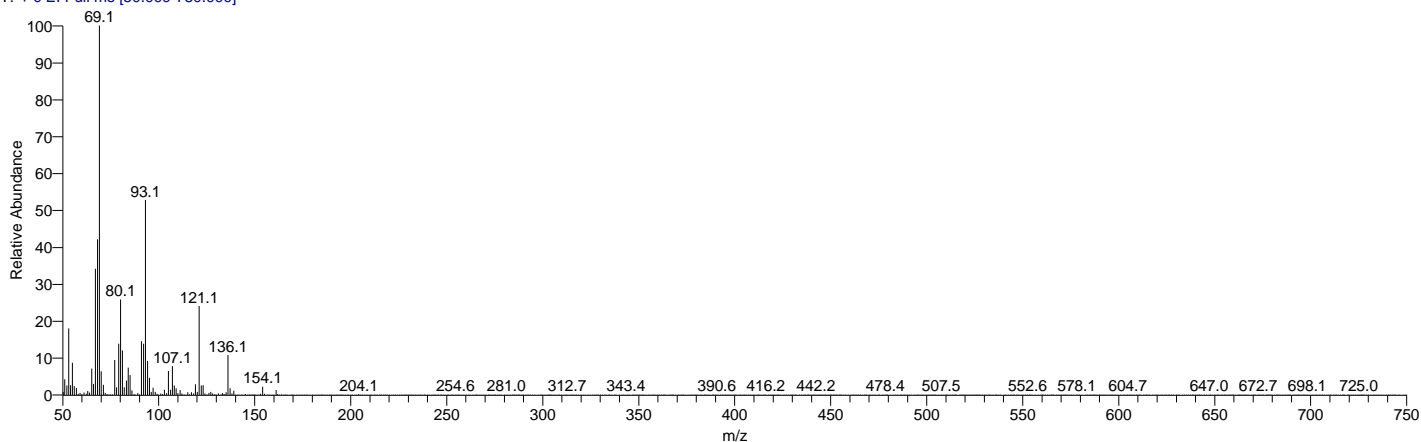

| RT   | Compound Name                                   | Area % | MF  | Molecular Formula                              | Molecular Weight | Cas #    | Library             |
|------|-------------------------------------------------|--------|-----|------------------------------------------------|------------------|----------|---------------------|
| 9.48 | 2,6-OCTADIEN-1-OL, 3,7-DIMETHYL-, ACETATE, (Z)- | 0.75   | 934 | C <sub>12</sub> H <sub>20</sub> O <sub>2</sub> | 196              | 141-12-8 | WileyRegi<br>stry8e |
| 9.48 | 2,6-Octadien-1-ol, 3,7-dimethyl-, acetate, (Z)- | 0.75   | 925 | C <sub>12</sub> H <sub>20</sub> O <sub>2</sub> | 196              | 141-12-8 | mainlib             |

# My GC-MS Report

| RT   | Compound Name                                      | Area % | MF  | Molecular Formula | Molecular Weight | Cas #    | Library             |
|------|----------------------------------------------------|--------|-----|-------------------|------------------|----------|---------------------|
| 9.48 | 2,6-OCTADIEN-1-OL,<br>3,7-DIMETHYL-, ACETATE, (Z)- | 0.75   | 928 | C12H20O2          | 196              | 141-12-8 | WileyRegi<br>stry8e |
| 9.48 | 2,6-Octadien-1-ol, 3,7-dimethyl-,<br>acetate, (Z)- | 0.75   | 927 | C12H20O2          | 196              | 141-12-8 | replib              |
| 9.48 | 2,6-OCTADIEN-1-OL,<br>3,7-DIMETHYL-, ACETATE       | 0.75   | 913 | C12H20O2          | 196              | 105-87-3 | WileyRegi<br>stry8e |

Compound Structure

Hit Spectrum

2,6-OCTADIEN-1-OL, 3,7-DIMETHYL-, ACETATE, (Z)-  
Formula C12H20O2, MW 196, CAS# 141-12-8, Entry# 80149  
(Z)-3,7-DIMETHYL-2,6-OCTADIENYL ACETATE #

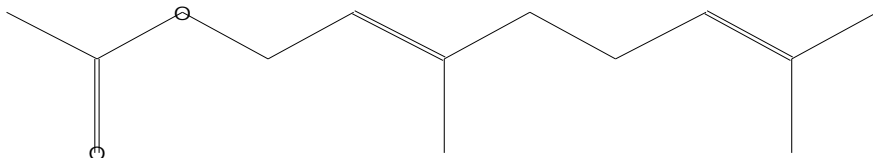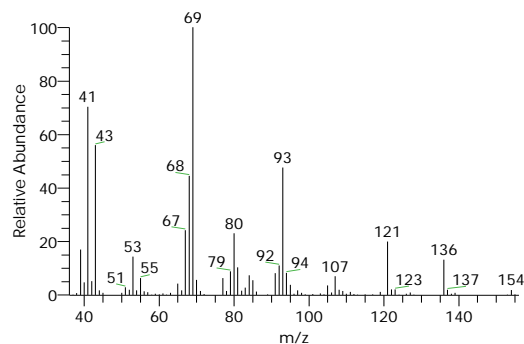

2,6-Octadien-1-ol, 3,7-dimethyl-, acetate, (Z)-  
Formula C12H20O2, MW 196, CAS# 141-12-8, Entry# 35647  
Nerol acetate

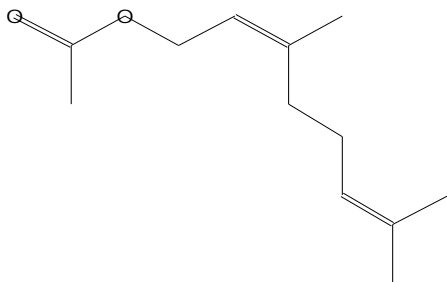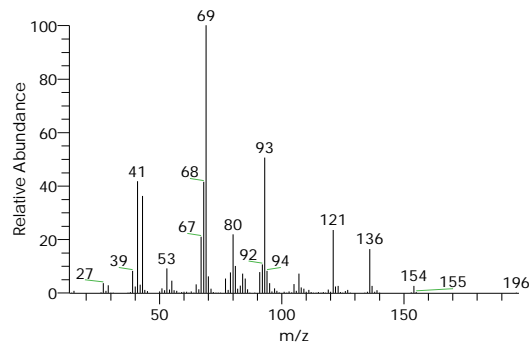

2,6-OCTADIEN-1-OL, 3,7-DIMETHYL-, ACETATE, (Z)-  
Formula C12H20O2, MW 196, CAS# 141-12-8, Entry# 79948  
(Z)-3,7-DIMETHYL-2,6-OCTADIENYL ACETATE #

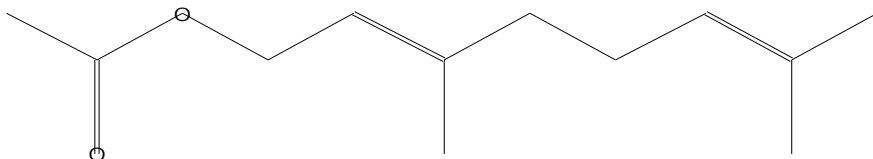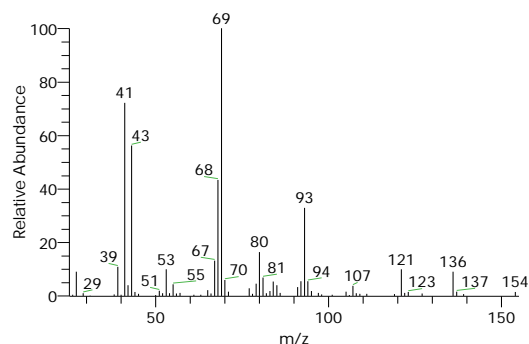

2,6-Octadien-1-ol, 3,7-dimethyl-, acetate, (Z)-  
Formula C12H20O2, MW 196, CAS# 141-12-8, Entry# 8433  
Nerol acetate

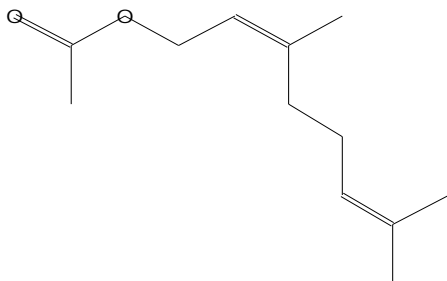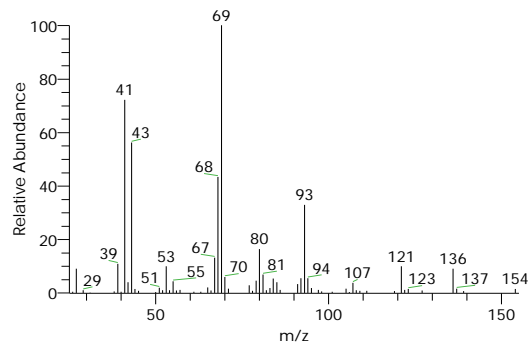

# My GC-MS Report

Compound Structure

Hit Spectrum

2,6-OCTADIEN-1-OL, 3,7-DIMETHYL-, ACETATE  
 Formula C<sub>12</sub>H<sub>20</sub>O<sub>2</sub>, MW 196, CAS# 105-87-3, Entry# 79958  
 2,6-OCTADIEN-1-OL, 3,7-DIMETHYL-, ACETATE, (E)-

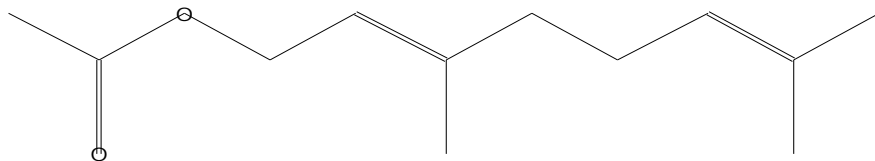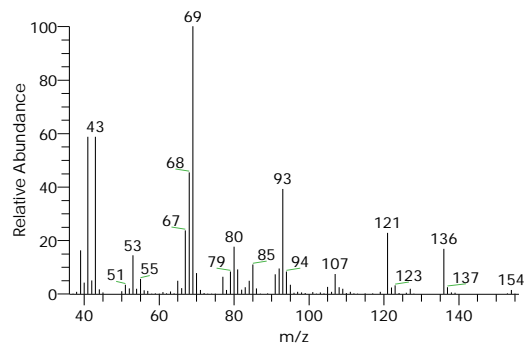

Lavender\_oil #1782 RT: 9.97 AV: 1 NL: 5.94E7  
 T: + c EI Full ms [50.000-750.000]

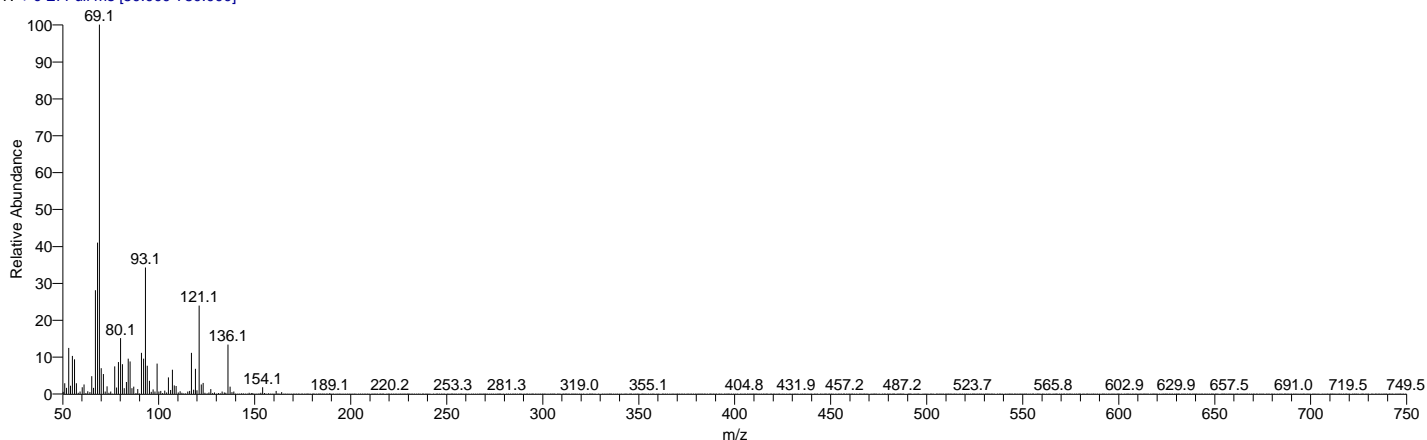

| RT   | Compound Name                                   | Area % | MF  | Molecular Formula                              | Molecular Weight | Cas #     | Library             |
|------|-------------------------------------------------|--------|-----|------------------------------------------------|------------------|-----------|---------------------|
| 9.97 | 2,6-OCTADIEN-1-OL, 3,7-DIMETHYL-, ACETATE, (Z)- | 2.24   | 879 | C <sub>12</sub> H <sub>20</sub> O <sub>2</sub> | 196              | 141-12-8  | WileyRegi<br>stry8e |
| 9.97 | 2,6-Octadien-1-ol, 3,7-dimethyl-, acetate       | 2.24   | 907 | C <sub>12</sub> H <sub>20</sub> O <sub>2</sub> | 196              | 16409-4-2 | replib              |
| 9.97 | Geranyl acetate                                 | 2.24   | 870 | C <sub>12</sub> H <sub>20</sub> O <sub>2</sub> | 196              | 105-87-3  | mainlib             |
| 9.97 | 2,6-OCTADIEN-1-OL, 3,7-DIMETHYL-, ACETATE       | 2.24   | 868 | C <sub>12</sub> H <sub>20</sub> O <sub>2</sub> | 196              | 105-87-3  | WileyRegi<br>stry8e |
| 9.97 | 2,6-OCTADIEN-1-OL, 3,7-DIMETHYL-, ACETATE       | 2.24   | 871 | C <sub>12</sub> H <sub>20</sub> O <sub>2</sub> | 196              | 105-87-3  | WileyRegi<br>stry8e |

Compound Structure

Hit Spectrum

2,6-OCTADIEN-1-OL, 3,7-DIMETHYL-, ACETATE, (Z)-  
 Formula C<sub>12</sub>H<sub>20</sub>O<sub>2</sub>, MW 196, CAS# 141-12-8, Entry# 80149  
 (Z)-3,7-DIMETHYL-2,6-OCTADIENYL ACETATE #

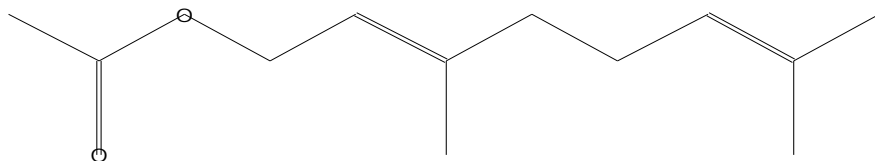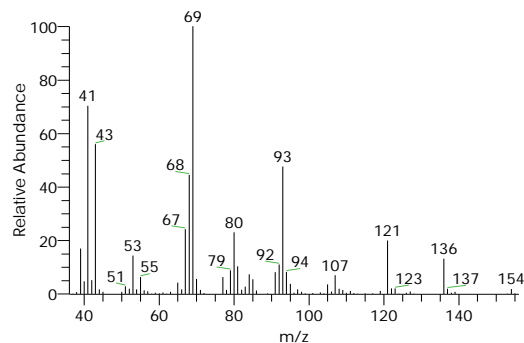

# My GC-MS Report

Compound Structure

Hit Spectrum

2,6-Octadien-1-ol, 3,7-dimethyl-, acetate  
Formula C<sub>12</sub>H<sub>20</sub>O<sub>2</sub>, MW 196, CAS# 16409-44-2, Entry# 8437  
2,6-Dimethyl-2,6-octadien-8-yl acetate

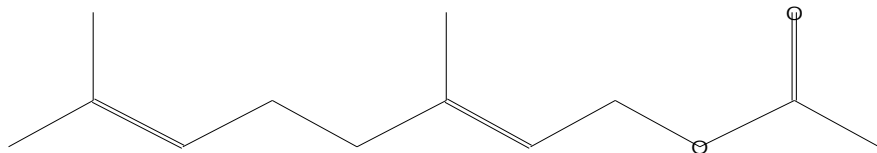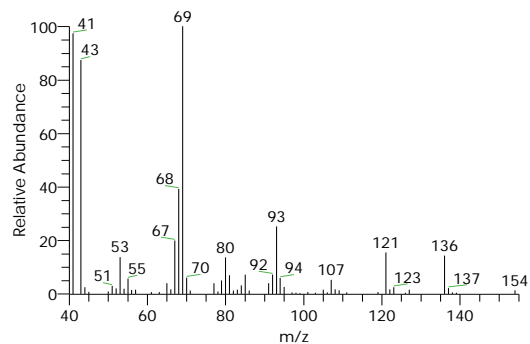

Geranyl acetate  
Formula C<sub>12</sub>H<sub>20</sub>O<sub>2</sub>, MW 196, CAS# 105-87-3, Entry# 34129  
2,6-Octadien-1-ol, 3,7-dimethyl-, acetate, (E)-

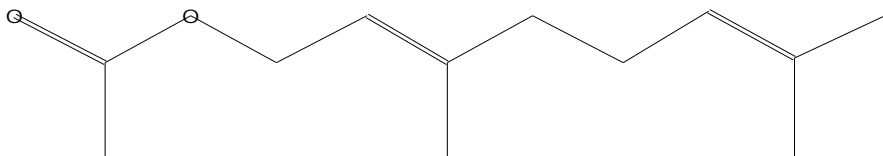

SI 859, RSI 870, mainlib, Entry# 34129, CAS# 105-87-3, Geranyl acetate

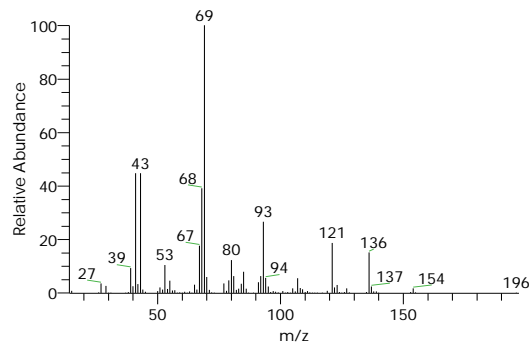

2,6-OCTADIEN-1-OL, 3,7-DIMETHYL-, ACETATE  
Formula C<sub>12</sub>H<sub>20</sub>O<sub>2</sub>, MW 196, CAS# 105-87-3, Entry# 79958  
2,6-OCTADIEN-1-OL, 3,7-DIMETHYL-, ACETATE, (E)-

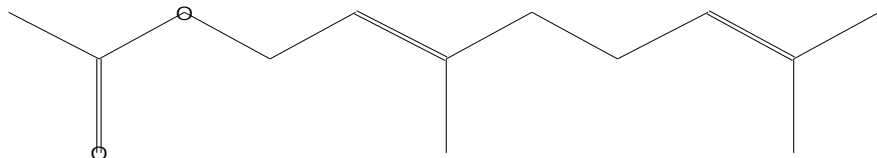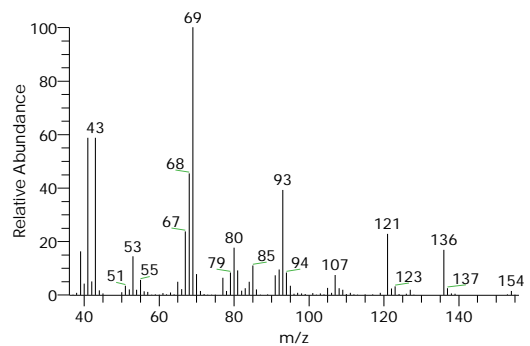

2,6-OCTADIEN-1-OL, 3,7-DIMETHYL-, ACETATE  
Formula C<sub>12</sub>H<sub>20</sub>O<sub>2</sub>, MW 196, CAS# 105-87-3, Entry# 79957  
2,6-OCTADIEN-1-OL, 3,7-DIMETHYL-, ACETATE, (E)-

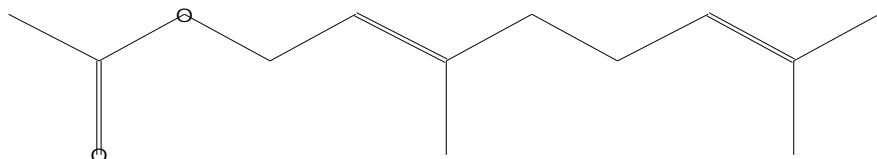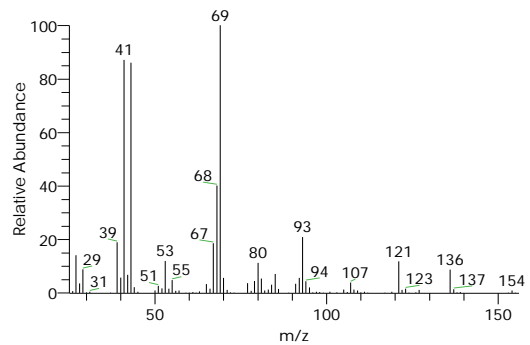

# My GC-MS Report

Lavender\_oil #1977 RT: 10.63 AV: 1 NL: 1.21E8  
T: + c EI Full ms [50.000-750.000]

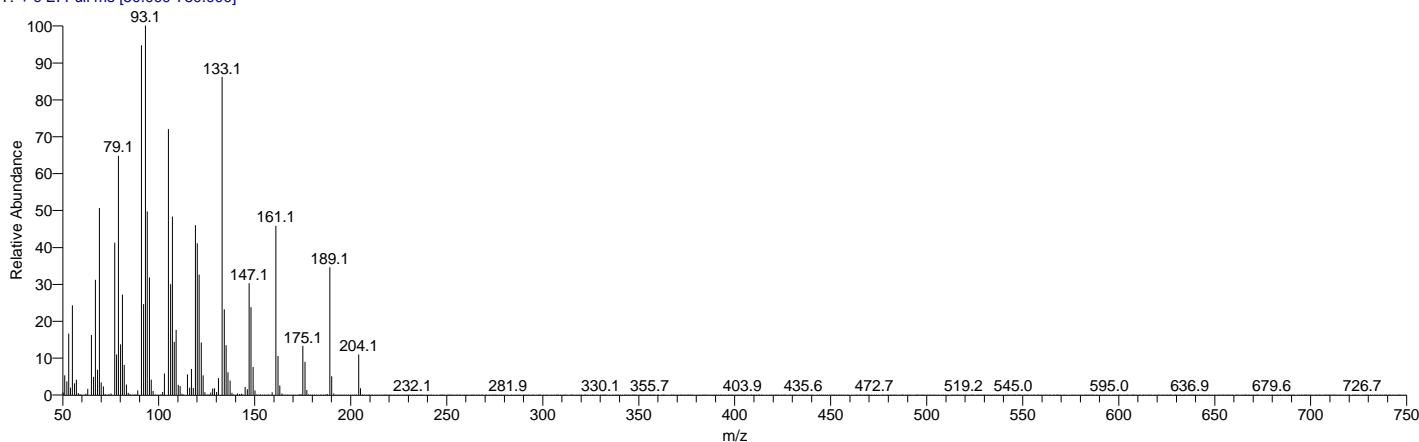

| RT    | Compound Name                                                                 | Area % | MF  | Molecular Formula | Molecular Weight | Cas #    | Library         |
|-------|-------------------------------------------------------------------------------|--------|-----|-------------------|------------------|----------|-----------------|
| 10.63 | Caryophyllene                                                                 | 16.35  | 933 | C15H24            | 204              | 87-44-5  | mainlib         |
| 10.63 | BICYCLO[7.2.0]UNDEC-4-ENE, 4,11,11-TRIMETHYL-8-METHYLENE-, [1R-(1R*,4E,9S*)]- | 16.35  | 930 | C15H24            | 204              | 87-44-5  | WileyRegistry8e |
| 10.63 | Isocaryophyllene                                                              | 16.35  | 919 | C15H24            | 204              | NA       | mainlib         |
| 10.63 | BICYCLO[7.2.0]UNDEC-4-ENE, 4,11,11-TRIMETHYL-8-METHYLENE-, [1R-(1R*,4E,9S*)]- | 16.35  | 919 | C15H24            | 204              | 87-44-5  | WileyRegistry8e |
| 10.63 | Bicyclo[7.2.0]undec-4-ene, 4,11,11-trimethyl-8-methylene-, [1R-(1R*,4Z,9S*)]- | 16.35  | 915 | C15H24            | 204              | 118-65-0 | replib          |

## Compound Structure

## Hit Spectrum

### Caryophyllene

Formula C15H24, MW 204, CAS# 87-44-5, Entry# 66572

Bicyclo[7.2.0]undec-4-ene, 4,11,11-trimethyl-8-methylene-, [1R-(1R\*,4E,9S\*)]-

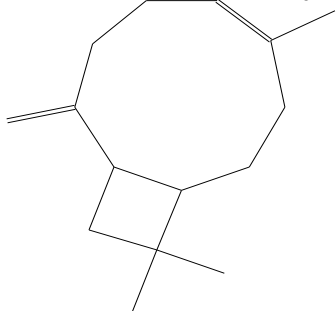

BICYCLO[7.2.0]UNDEC-4-ENE, 4,11,11-TRIMETHYL-8-METHYLENE-, [1R-(1R\*,4E,9S\*)]-

Formula C15H24, MW 204, CAS# 87-44-5, Entry# 89162

2,6,10,10-TETRAMETHYLBICYCLO[7.2.0]UNDECA-1,6-DIENE #

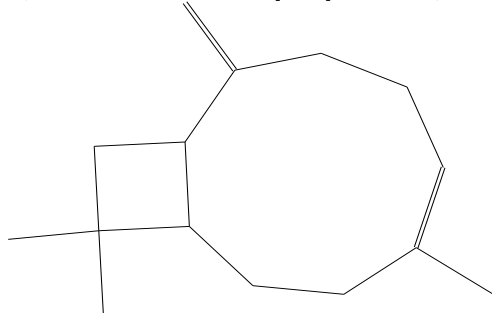

SI 933, RSI 933, mainlib, Entry# 66572, CAS# 87-44-5, Caryophyllene

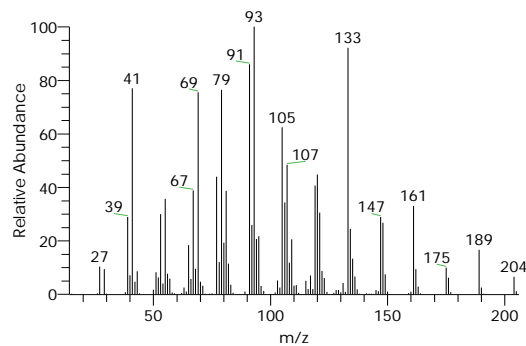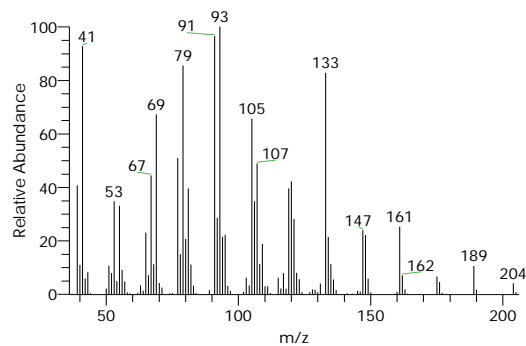

# My GC-MS Report

Compound Structure

Hit Spectrum

Isocaryophyllene  
Formula C<sub>15</sub>H<sub>24</sub>, MW 204, CAS# NA, Entry# 65988  
4,11,11-Trimethyl-8-methylenebicyclo[7.2.0]undec-4-ene #

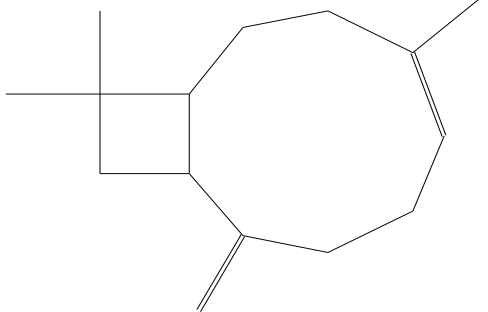

SI 915, RSI 919, mainlib, Entry# 65988, CAS# NA, Isocaryophyllene

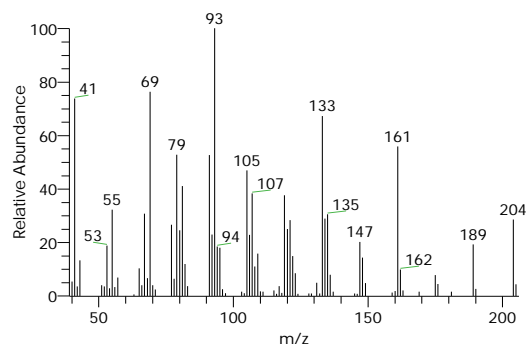

BICYCLO[7.2.0]UNDEC-4-ENE, 4,11,11-TRIMETHYL-8-METHYLENE-, [1R-(1R\*,4E,9S\*)]-  
Formula C<sub>15</sub>H<sub>24</sub>, MW 204, CAS# 87-44-5, Entry# 89170  
2,6,10,10-TETRAMETHYLBICYCLO[7.2.0]UNDECA-1,6-DIENE #

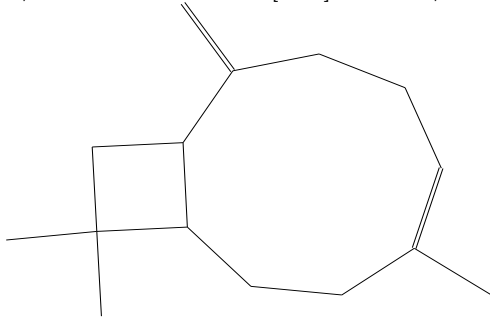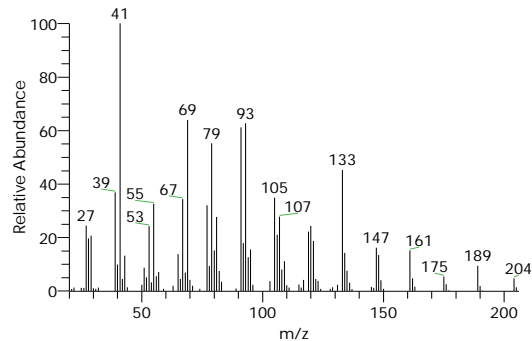

Bicyclo[7.2.0]undec-4-ene, 4,11,11-trimethyl-8-methylene-, [1R-(1R\*,4Z,9S\*)]-  
Formula C<sub>15</sub>H<sub>24</sub>, MW 204, CAS# 118-65-0, Entry# 1329  
Isocaryophyllene

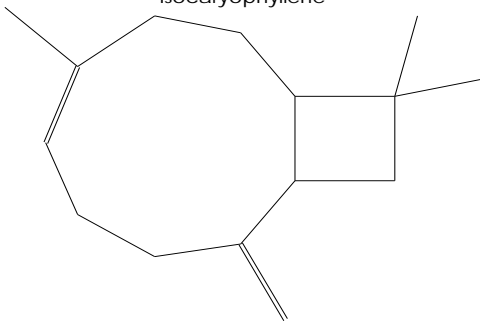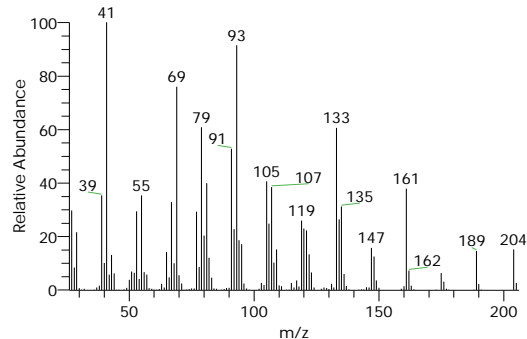

Lavender\_oil #2072 RT: 10.95 AV: 1 NL: 5.15E6  
T: + c EI Full ms [50.000-750.000]

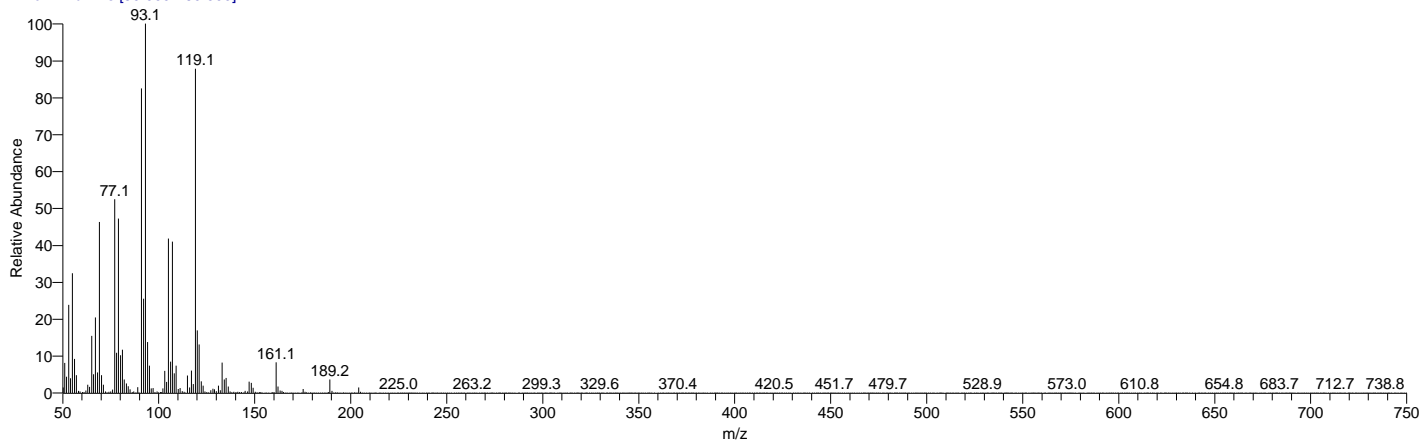

| RT    | Compound Name                                                   | Area % | MF  | Molecular Formula               | Molecular Weight | Cas #      | Library |
|-------|-----------------------------------------------------------------|--------|-----|---------------------------------|------------------|------------|---------|
| 10.95 | Bicyclo[3.1.1]hept-2-ene, 2,6-dimethyl-6-(4-methyl-3-pentenyl)- | 0.26   | 958 | C <sub>15</sub> H <sub>24</sub> | 204              | 17699-05-7 | mainlib |
| 10.95 | trans-à-Bergamotene                                             | 0.26   | 954 | C <sub>15</sub> H <sub>24</sub> | 204              | 13474-59-4 | replib  |

# My GC-MS Report

| RT    | Compound Name                                      | Area % | MF  | Molecular Formula | Molecular Weight | Cas #   | Library |
|-------|----------------------------------------------------|--------|-----|-------------------|------------------|---------|---------|
| 10.95 | 1,3,6,10-Dodecatetraene, 3,7,11-trimethyl-, (Z,E)- | 0.26   | 920 | C15H24            | 204              | 26560-1 | mainlib |
| 10.95 | 1,3,6,10-Dodecatetraene, 3,7,11-trimethyl-, (Z,E)- | 0.26   | 937 | C15H24            | 204              | 26560-1 | replib  |
| 10.95 | cis- $\alpha$ -Bergamotene                         | 0.26   | 908 | C15H24            | 204              | 18252-4 | mainlib |

## Compound Structure

## Hit Spectrum

Bicyclo[3.1.1]hept-2-ene, 2,6-dimethyl-6-(4-methyl-3-pentenyl)-  
 Formula C15H24, MW 204, CAS# 17699-05-7, Entry# 65801  
 2-Norpinene, 2,6-dimethyl-6-(4-methyl-3-pentenyl)-

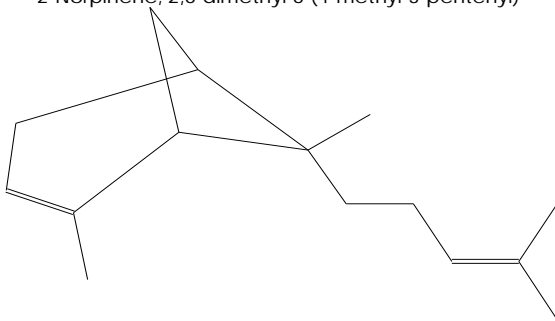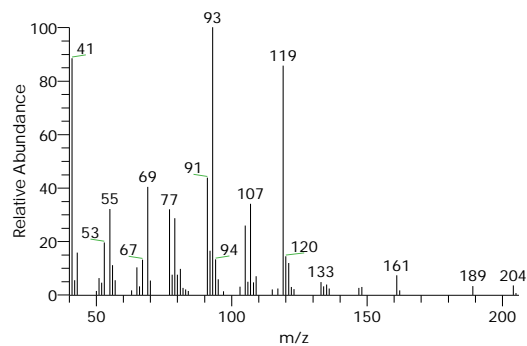

trans- $\alpha$ -Bergamotene  
 Formula C15H24, MW 204, CAS# 13474-59-4, Entry# 14007  
 2,6-Dimethyl-6-(4-methyl-3-pentenyl)bicyclo[3.1.1]hept-2-ene #

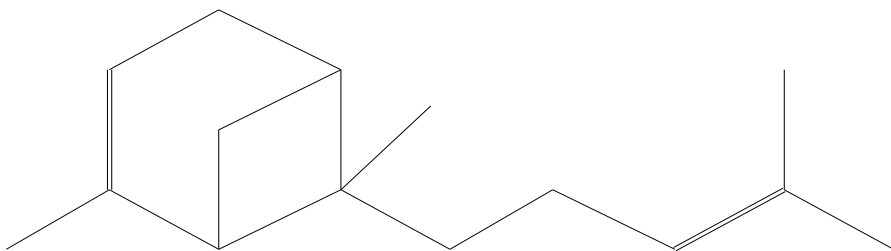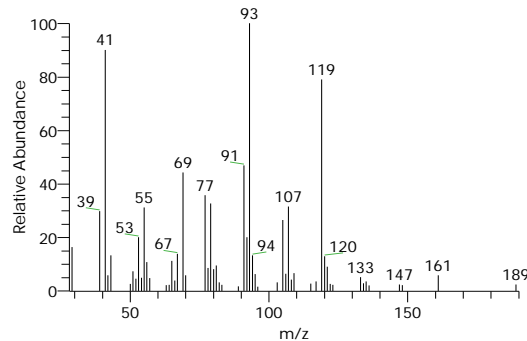

1,3,6,10-Dodecatetraene, 3,7,11-trimethyl-, (Z,E)-  
 Formula C15H24, MW 204, CAS# 26560-14-5, Entry# 3802  
 (Z,E)- $\alpha$ -Farnesene

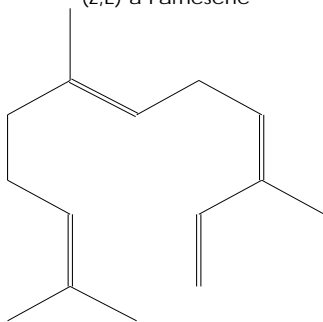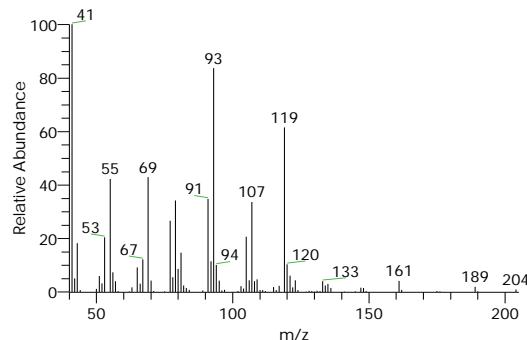

1,3,6,10-Dodecatetraene, 3,7,11-trimethyl-, (Z,E)-  
 Formula C15H24, MW 204, CAS# 26560-14-5, Entry# 1332  
 (Z,E)- $\alpha$ -Farnesene

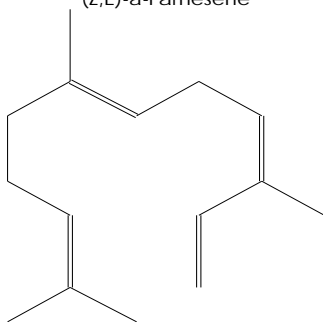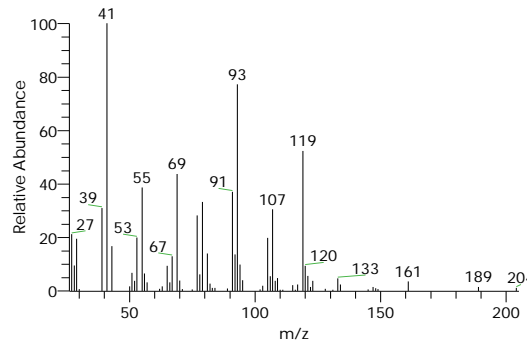



# My GC-MS Report

Compound Structure

Hit Spectrum

cis-à-Bergamotene

Formula C<sub>15</sub>H<sub>24</sub>, MW 204, CAS# 18252-46-5, Entry# 99916  
(1R,5R,6R)-2,6-Dimethyl-6-(4-methylpent-3-en-1-yl)bicyclo[3.1.1]hept-2-ene

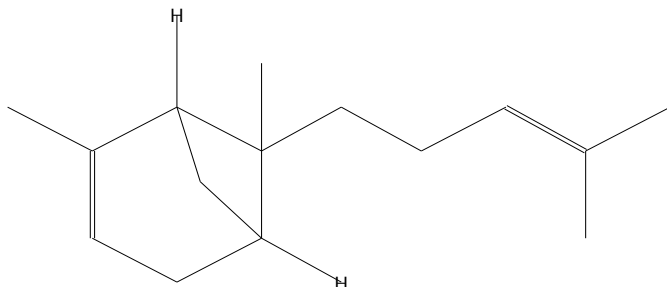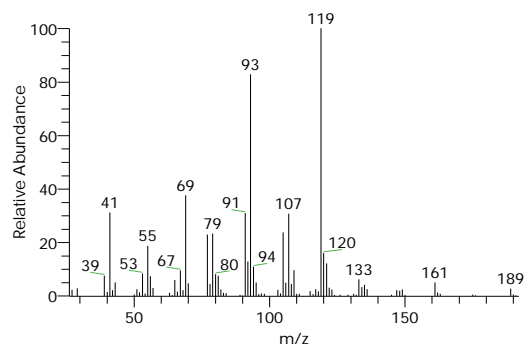

Lavender\_oil #2277 RT: 11.63 AV: 1 NL: 2.05E8  
T: + c EI Full ms [50.000-750.000]

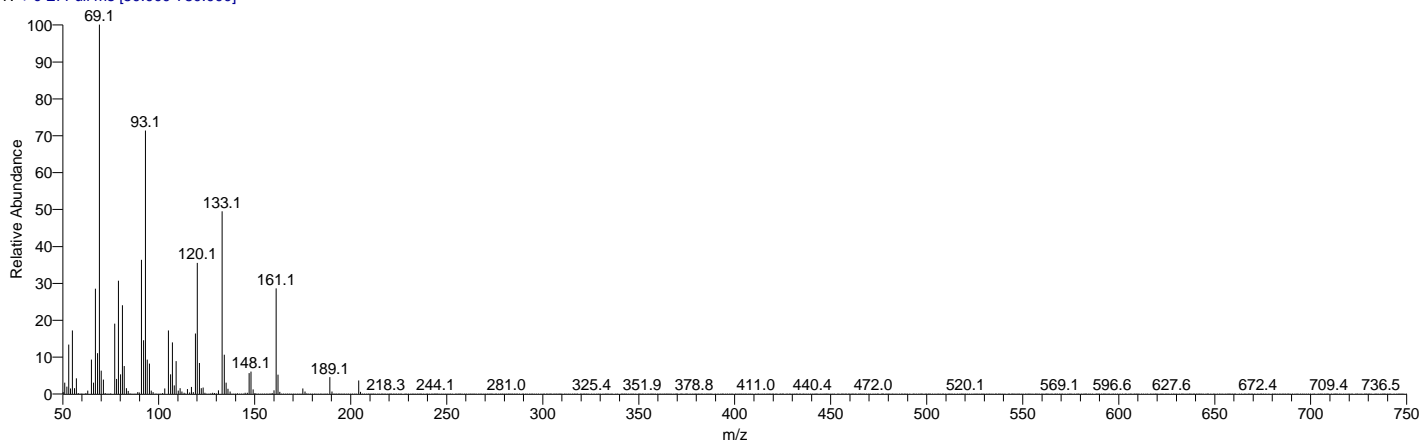

| RT    | Compound Name                                                                        | Area % | MF  | Molecular Formula               | Molecular Weight | Cas #   | Library             |
|-------|--------------------------------------------------------------------------------------|--------|-----|---------------------------------|------------------|---------|---------------------|
| 11.63 | cis-à-Farnesene                                                                      | 14.09  | 938 | C <sub>15</sub> H <sub>24</sub> | 204              | 28973-9 | mainlib             |
| 11.63 | (E)-à-Farnesene                                                                      | 14.09  | 931 | C <sub>15</sub> H <sub>24</sub> | 204              | 18794-8 | mainlib             |
| 11.63 | (E)-à-Farnesene                                                                      | 14.09  | 943 | C <sub>15</sub> H <sub>24</sub> | 204              | 18794-8 | replib              |
| 11.63 | 1,6,10-DODECATRIENE,<br>7,11-DIMETHYL-3-METHYLENE-,<br>(E)-                          | 14.09  | 941 | C <sub>15</sub> H <sub>24</sub> | 204              | 502-60  | WileyRegi<br>stry8e |
| 11.63 | Bicyclo[7.2.0]undec-4-ene,<br>4,11,11-trimethyl-8-methylene-, [1R-(<br>1R*,4Z,9S*)]- | 14.09  | 891 | C <sub>15</sub> H <sub>24</sub> | 204              | 118-65  | replib              |

Compound Structure

Hit Spectrum

cis-à-Farnesene

Formula C<sub>15</sub>H<sub>24</sub>, MW 204, CAS# 28973-97-9, Entry# 3453  
1,6,10-Dodecatriene, 7,11-dimethyl-3-methylene-, (Z)-

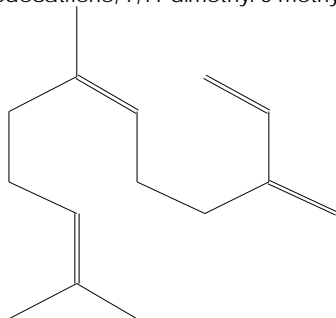

SI 935, RSI 938, mainlib, Entry# 3453, CAS# 28973-97-9, cis-à-Farnesene

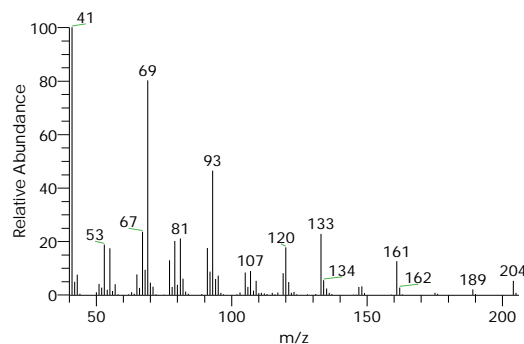

# My GC-MS Report

## Compound Structure

## Hit Spectrum

(E)- $\alpha$ -Farnesene

Formula C<sub>15</sub>H<sub>24</sub>, MW 204, CAS# 18794-84-8, Entry# 3451  
1,6,10-Dodecatriene, 7,11-dimethyl-3-methylene-, (E)-

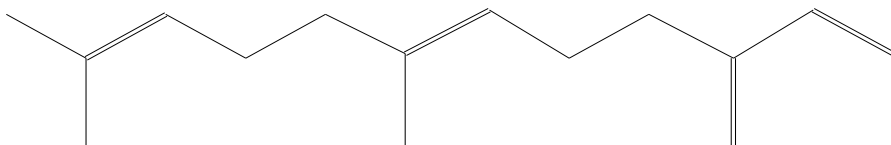

SI 928, RSI 931, mainlib, Entry# 3451, CAS# 18794-84-8, (E)- $\alpha$ -Farnesene

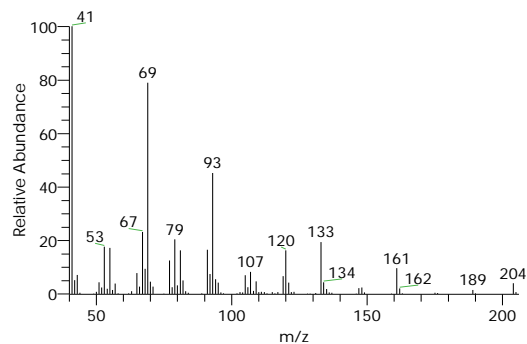

(E)- $\alpha$ -Farnesene

Formula C<sub>15</sub>H<sub>24</sub>, MW 204, CAS# 18794-84-8, Entry# 8532  
1,6,10-Dodecatriene, 7,11-dimethyl-3-methylene-, (E)-

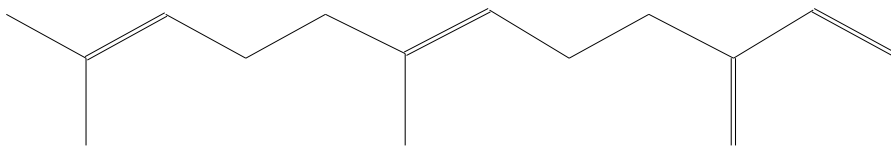

SI 920, RSI 943, replib, Entry# 8532, CAS# 18794-84-8, (E)- $\alpha$ -Farnesene

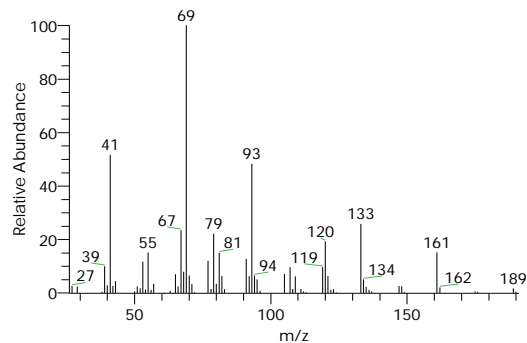

1,6,10-DODECATRIENE, 7,11-DIMETHYL-3-METHYLENE-, (E)-  
Formula C<sub>15</sub>H<sub>24</sub>, MW 204, CAS# 502-60-3, Entry# 89037  
(E)- $\alpha$ -FARNESENE

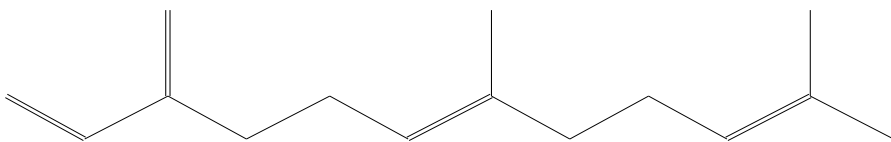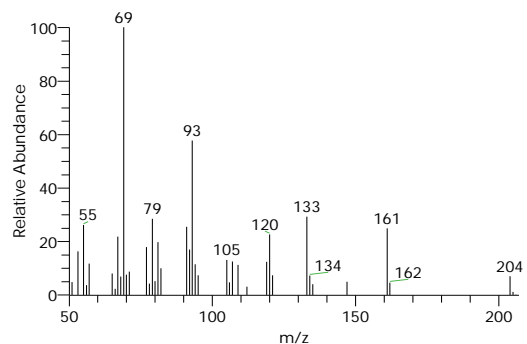

Bicyclo[7.2.0]undec-4-ene, 4,11,11-trimethyl-8-methylene-, [1R-(1R\*,4Z,9S\*)]-  
Formula C<sub>15</sub>H<sub>24</sub>, MW 204, CAS# 118-65-0, Entry# 1245  
Isocaryophyllene

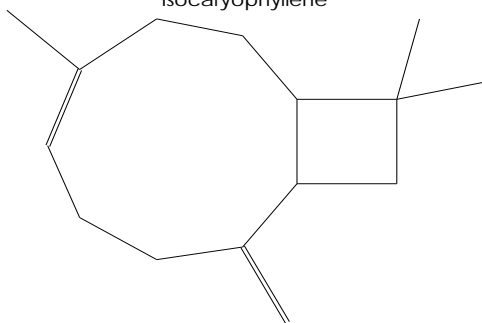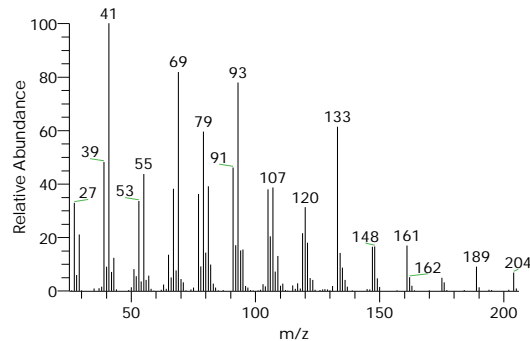

# My GC-MS Report

Lavender\_oil #2389 RT: 12.01 AV: 1 NL: 3.18E7  
T: + c EI Full ms [50.000-750.000]

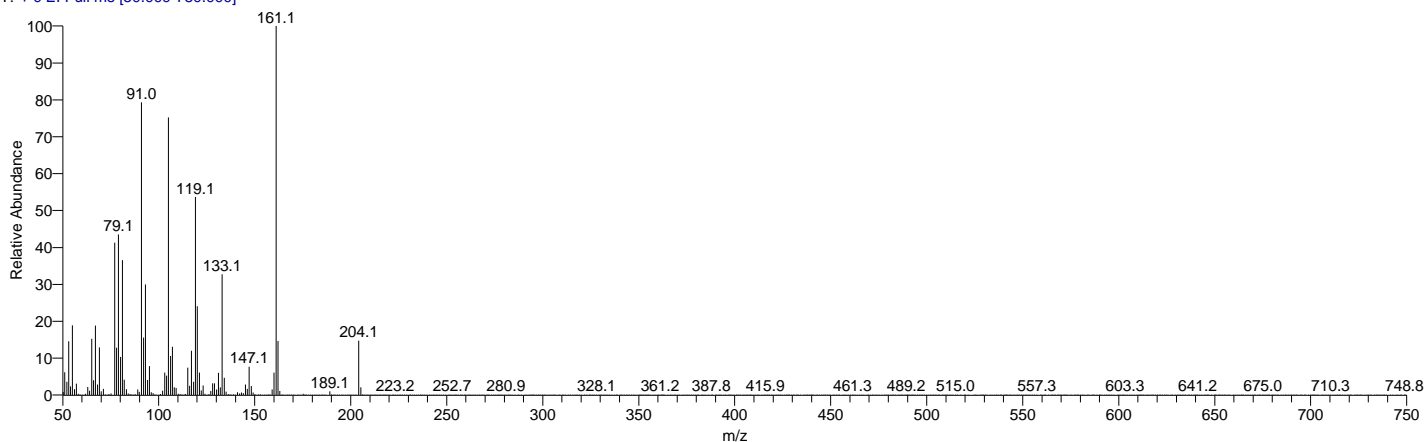

| RT    | Compound Name                                                           | Area % | MF  | Molecular Formula | Molecular Weight | Cas #      | Library         |
|-------|-------------------------------------------------------------------------|--------|-----|-------------------|------------------|------------|-----------------|
| 12.01 | 1,6-CYCLODECADIENE, 1-METHYL-5-METHYLENE-8-(1-METHYLETHYL)-, [S-(E,E)]- | 1.29   | 961 | C15H24            | 204              | 23986-74-5 | WileyRegistry8e |
| 12.01 | 1,6-CYCLODECADIENE, 1-METHYL-5-METHYLENE-8-(1-METHYLETHYL)-, [S-(E,E)]- | 1.29   | 948 | C15H24            | 204              | 23986-74-5 | WileyRegistry8e |
| 12.01 | Germacrene D                                                            | 1.29   | 949 | C15H24            | 204              | 23986-74-5 | replib          |
| 12.01 | Germacrene D                                                            | 1.29   | 951 | C15H24            | 204              | 23986-74-5 | mainlib         |
| 12.01 | 1,6-CYCLODECADIENE, 1-METHYL-5-METHYLENE-8-(1-METHYLETHYL)-, [S-(E,E)]- | 1.29   | 951 | C15H24            | 204              | 23986-74-5 | WileyRegistry8e |

## Compound Structure

## Hit Spectrum

1,6-CYCLODECADIENE, 1-METHYL-5-METHYLENE-8-(1-METHYLETHYL)-, [S-(E,E)]-  
Formula C15H24, MW 204, CAS# 23986-74-5, Entry# 89578  
GERMACRA-1(10),4(15),5-TRIENE, (-)-

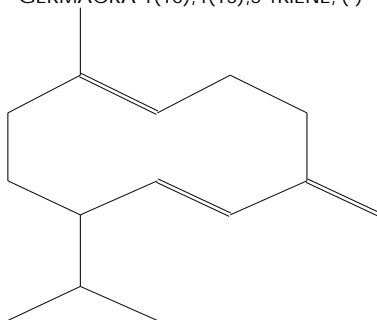

1,6-CYCLODECADIENE, 1-METHYL-5-METHYLENE-8-(1-METHYLETHYL)-, [S-(E,E)]-  
Formula C15H24, MW 204, CAS# 23986-74-5, Entry# 89560  
GERMACRA-1(10),4(15),5-TRIENE, (-)-

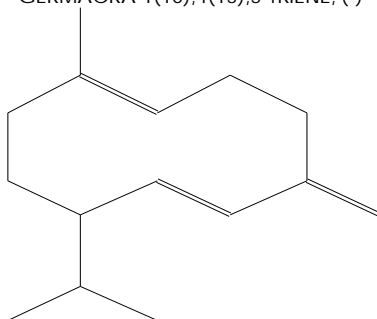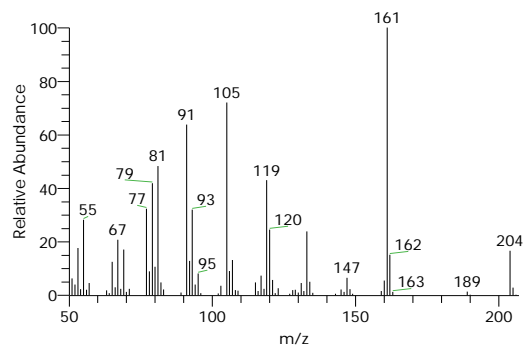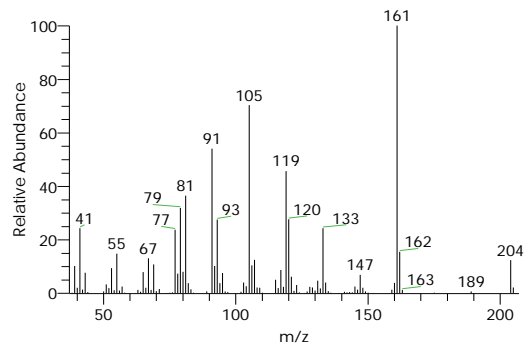

# My GC-MS Report

Compound Structure

Hit Spectrum

Germacrene D

Formula C<sub>15</sub>H<sub>24</sub>, MW 204, CAS# 23986-74-5, Entry# 24886  
(S,1Z,6Z)-8-Isopropyl-1-methyl-5-methylenecyclodeca-1,6-diene

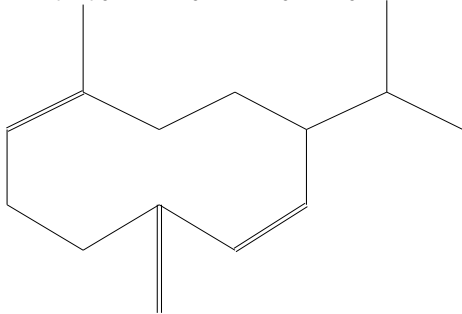

SI 934, RSI 949, replib, Entry# 24886, CAS# 23986-74-5, Germacrene D

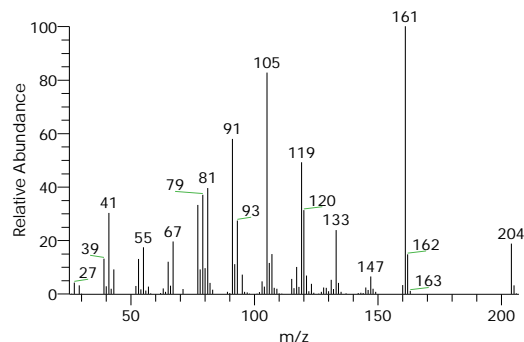

Germacrene D

Formula C<sub>15</sub>H<sub>24</sub>, MW 204, CAS# 23986-74-5, Entry# 150487  
(S,1Z,6Z)-8-Isopropyl-1-methyl-5-methylenecyclodeca-1,6-diene

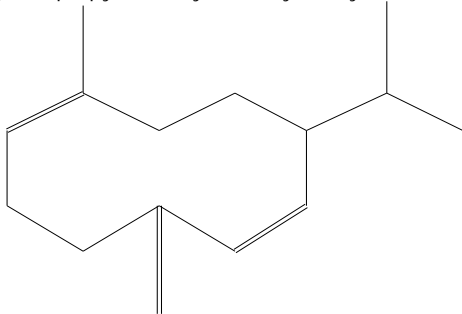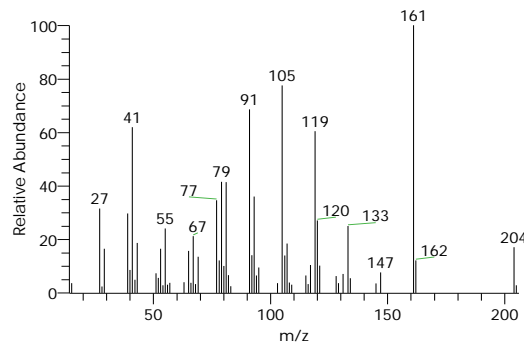

1,6-CYCLODECADIENE, 1-METHYL-5-METHYLENE-8-(1-METHYLETHYL)-, [S-(E,E)]-  
Formula C<sub>15</sub>H<sub>24</sub>, MW 204, CAS# 23986-74-5, Entry# 362375  
GERMACRA-1(10),4(15),5-TRIENE, (-)-

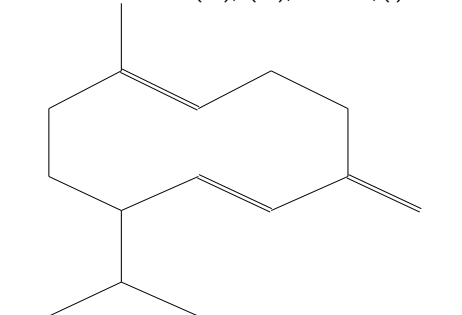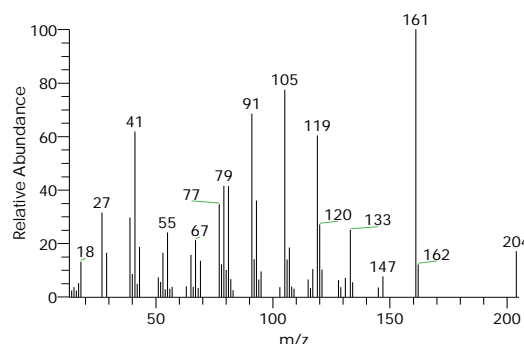

Lavender\_oil #2614 RT: 12.76 AV: 1 NL: 5.43E6  
T: + c EI Full ms [50.000-750.000]

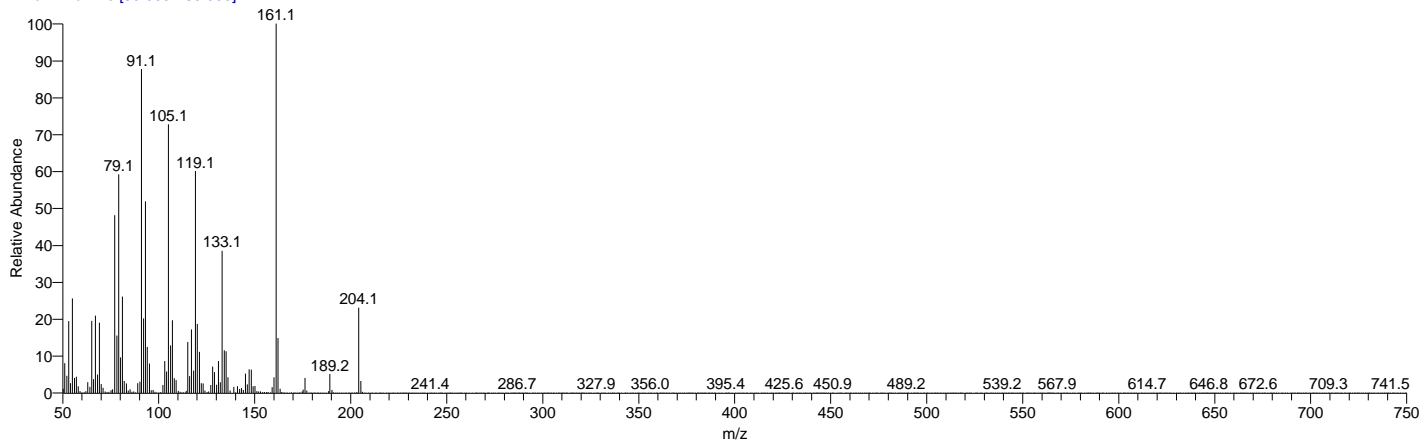

| RT    | Compound Name                                                                                   | Area % | MF  | Molecular Formula               | Molecular Weight | Cas #          | Library |
|-------|-------------------------------------------------------------------------------------------------|--------|-----|---------------------------------|------------------|----------------|---------|
| 12.76 | Naphthalene, 1,2,3,4,4a,5,6,8a-octahydro-7-methyl-4-methylene-1-(1-methylethyl)-, (1à,4aà,8aà)- | 0.35   | 924 | C <sub>15</sub> H <sub>24</sub> | 204              | 39029-4<br>1-9 | replib  |

# My GC-MS Report

| RT    | Compound Name                                                                                              | Area % | MF  | Molecular Formula | Molecular Weight | Cas #          | Library             |
|-------|------------------------------------------------------------------------------------------------------------|--------|-----|-------------------|------------------|----------------|---------------------|
| 12.76 | $\zeta$ -Muurolene                                                                                         | 0.35   | 927 | C15H24            | 204              | 30021-7<br>4-0 | replib              |
| 12.76 | NAPHTHALENE,<br>1,2,3,4,4A,5,6,8A-OCTAHYDRO-7<br>-METHYL-4-METHYLENE-1-(1-M<br>ETHYLETHYL)-, (1à,4Aá,8Aà)- | 0.35   | 917 | C15H24            | 204              | 39029-4<br>1-9 | WileyRegi<br>stry8e |
| 12.76 | Naphthalene,<br>1,2,3,4,4a,5,6,8a-octahydro-7-methyl<br>-4-methylene-1-(1-methylethyl)-,<br>(1à,4aá,8aà)-  | 0.35   | 915 | C15H24            | 204              | 39029-4<br>1-9 | replib              |
| 12.76 | $\zeta$ -Muurolene                                                                                         | 0.35   | 912 | C15H24            | 204              | 30021-7<br>4-0 | replib              |

Compound Structure

Hit Spectrum

Formula C15H24, MW 204, CAS# 39029-41-9, Entry# 24895

$\zeta$ -Cadinene

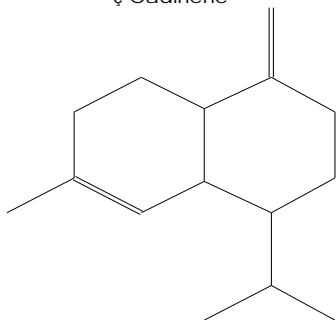

$\zeta$ -Muurolene

Formula C15H24, MW 204, CAS# 30021-74-0, Entry# 24843

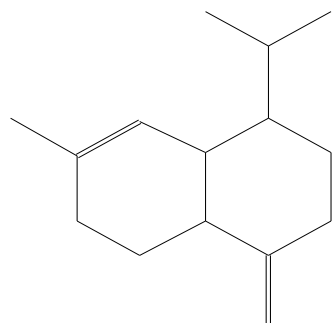

Formula C15H24, MW 204, CAS# 39029-41-9, Entry# 89268

1-ISOPROPYL-7-METHYL-4-METHYLENE-1,2,3,4,4A,5,6,8A-OCTAHYDRONAPHTHALENE #

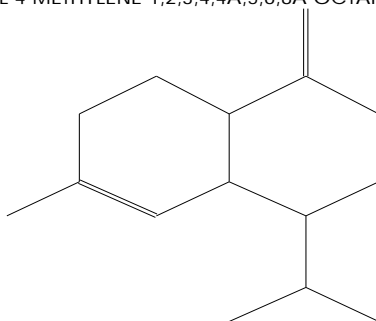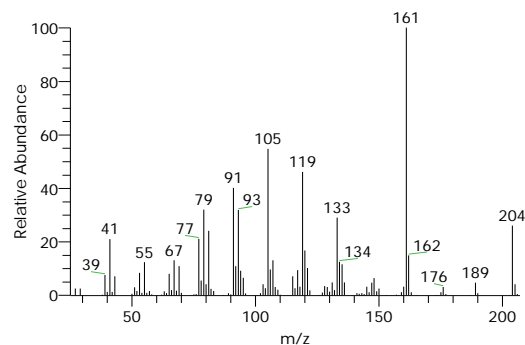

SI 916, RSI 927, replib, Entry# 24843, CAS# 30021-74-0,  $\zeta$ -Muurolene

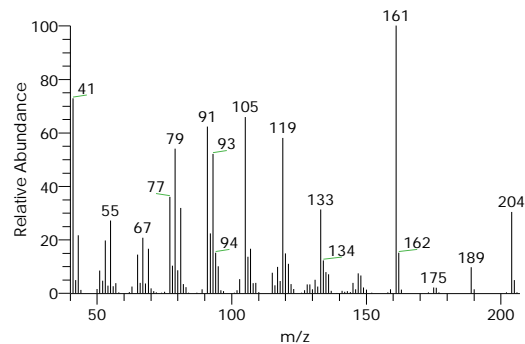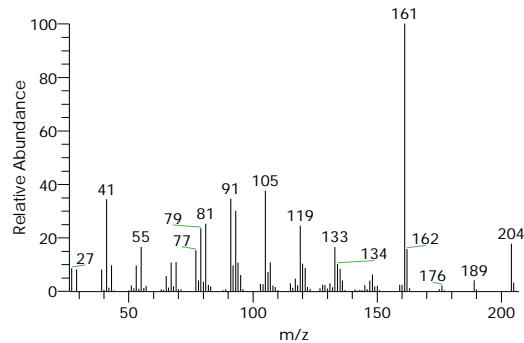

# My GC-MS Report

Compound Structure

Hit Spectrum

Formula C<sub>15</sub>H<sub>24</sub>, MW 204, CAS# 39029-41-9, Entry# 24890

ζ-Cadinene

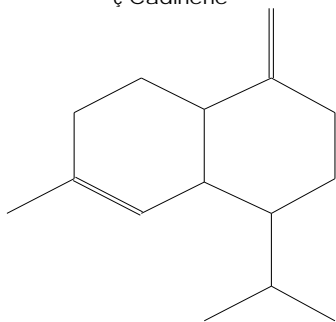

ζ-Muurolene

Formula C<sub>15</sub>H<sub>24</sub>, MW 204, CAS# 30021-74-0, Entry# 24906

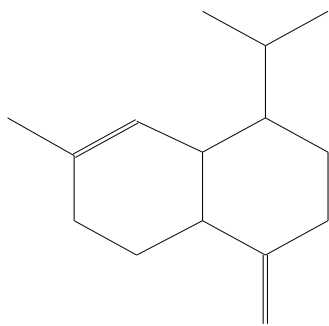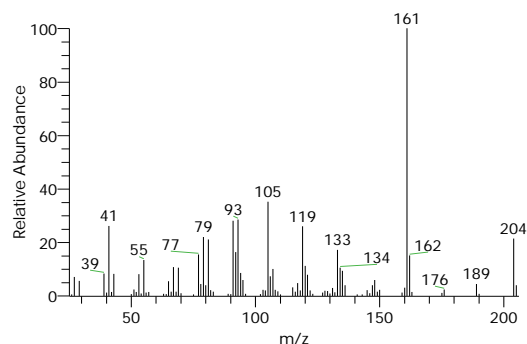

SI 906, RSI 912, replib, Entry# 24906, CAS# 30021-74-0, ζ-Muurolene

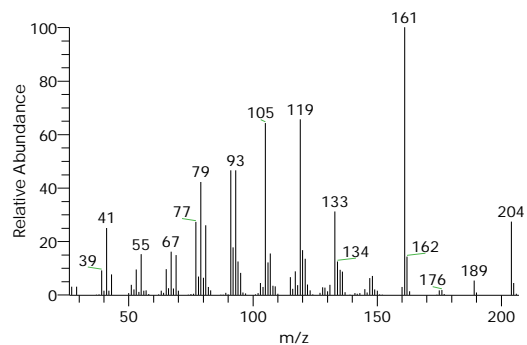

Lavender\_oil #3082 RT: 14.33 AV: 1 NL: 1.06E7  
T: + c EI Full ms [50.000-750.000]

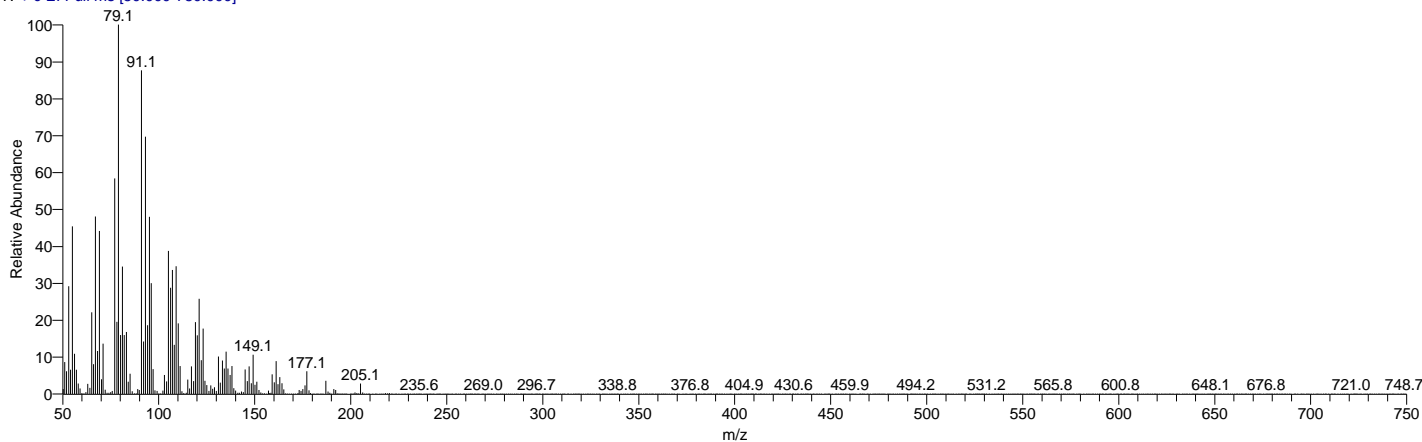

| RT    | Compound Name                                                                                           | Area % | MF  | Molecular Formula                 | Molecular Weight | Cas #         | Library             |
|-------|---------------------------------------------------------------------------------------------------------|--------|-----|-----------------------------------|------------------|---------------|---------------------|
| 14.33 | (-)-5-OXATRICYCLO[8.2.0.0(4,6)]<br>DODECANE,,12-TRIMETHYL-9-M<br>ETHYLENE-,<br>[1R-(1R*,4R*,6R*,10S*)]- | 0.77   | 940 | C <sub>15</sub> H <sub>24</sub> O | 220              | 1139-3<br>0-6 | WileyRegi<br>stry8e |
| 14.33 | (-)-5-OXATRICYCLO[8.2.0.0(4,6)]<br>DODECANE,,12-TRIMETHYL-9-M<br>ETHYLENE-,<br>[1R-(1R*,4R*,6R*,10S*)]- | 0.77   | 929 | C <sub>15</sub> H <sub>24</sub> O | 220              | 1139-3<br>0-6 | WileyRegi<br>stry8e |
| 14.33 | (-)-5-OXATRICYCLO[8.2.0.0(4,6)]<br>DODECANE,,12-TRIMETHYL-9-M<br>ETHYLENE-,<br>[1R-(1R*,4R*,6R*,10S*)]- | 0.77   | 926 | C <sub>15</sub> H <sub>24</sub> O | 220              | 1139-3<br>0-6 | WileyRegi<br>stry8e |
| 14.33 | Caryophyllene oxide                                                                                     | 0.77   | 913 | C <sub>15</sub> H <sub>24</sub> O | 220              | 1139-3<br>0-6 | mainlib             |
| 14.33 | 4,12,12-TRIMETHYL-9-METHYLE<br>NE-5-OXATRICYCLO[8.2.0.0~4,6<br>~]DODECANE                               | 0.77   | 913 | C <sub>15</sub> H <sub>24</sub> O | 220              | NA            | WileyRegi<br>stry8e |

# My GC-MS Report

Compound Structure

Hit Spectrum

Formula C<sub>15</sub>H<sub>24</sub>O, MW 220, CAS# 1139-30-6, Entry# 107245  
5-OXATRICYCLO[8.2.0.04,6]DODECANE, 4,12,12-TRIMETHYL-9-METHYLENE-, (1R,4R,6R,10S)-

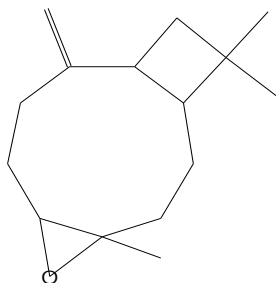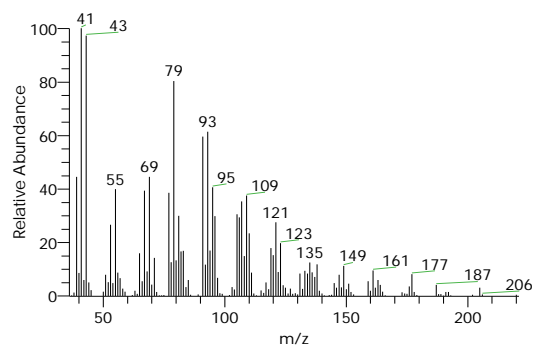

Formula C<sub>15</sub>H<sub>24</sub>O, MW 220, CAS# 1139-30-6, Entry# 107244  
5-OXATRICYCLO[8.2.0.04,6]DODECANE, 4,12,12-TRIMETHYL-9-METHYLENE-, (1R,4R,6R,10S)-

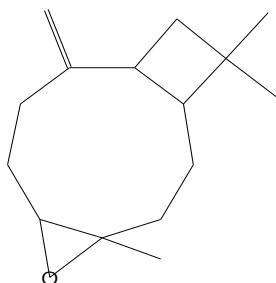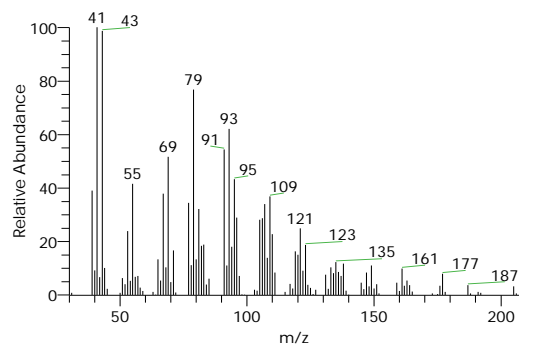

Formula C<sub>15</sub>H<sub>24</sub>O, MW 220, CAS# 1139-30-6, Entry# 107246  
5-OXATRICYCLO[8.2.0.04,6]DODECANE, 4,12,12-TRIMETHYL-9-METHYLENE-, (1R,4R,6R,10S)-

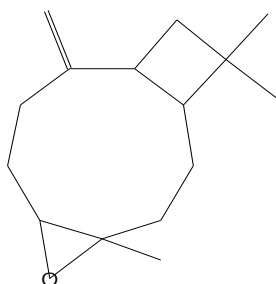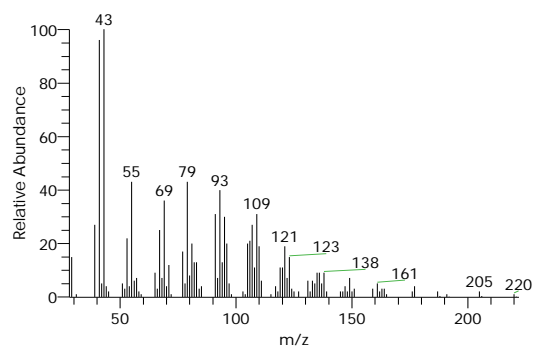

Caryophyllene oxide

Formula C<sub>15</sub>H<sub>24</sub>O, MW 220, CAS# 1139-30-6, Entry# 6247

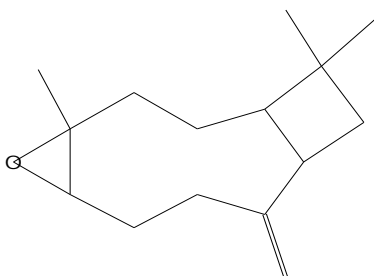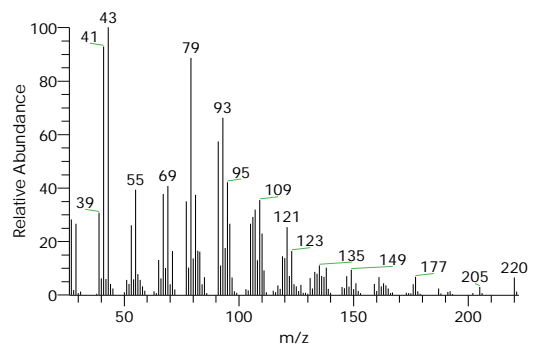

# My GC-MS Report

Compound Structure

Hit Spectrum

4,12,12-TRIMETHYL-9-METHYLENE-5-OXATRICYCLO[8.2.0.0-4,6-]DODECANE

Formula C<sub>15</sub>H<sub>24</sub>O, MW 220, CAS# NA, Entry# 388109

CARYOPHYLLENOXID

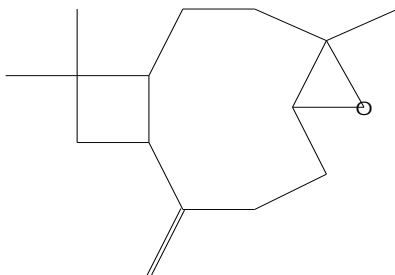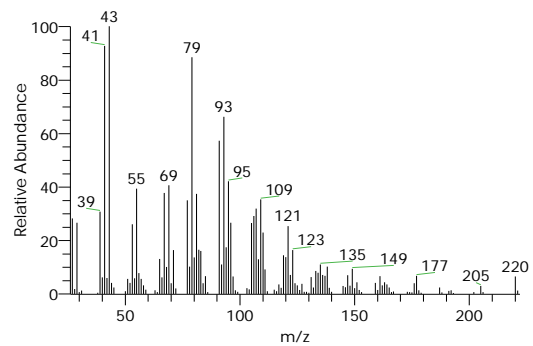

Supplement: mmc1.pdf [file mmc1.pdf]
