# Supplementary material for: Larvicidal and adulticidal activity of essential oils from plants of the Lamiaceae family against the West Nile virus vector, Culex pipiens (Diptera: Culicidae)
Source: PubMed Central journal article supplement (PMC9232543; doi:10.1016/j.sjbs.2022.103350), 2022-06-16

# My GC-MS Report

RT: 0.00 - 37.11 SM: 15B

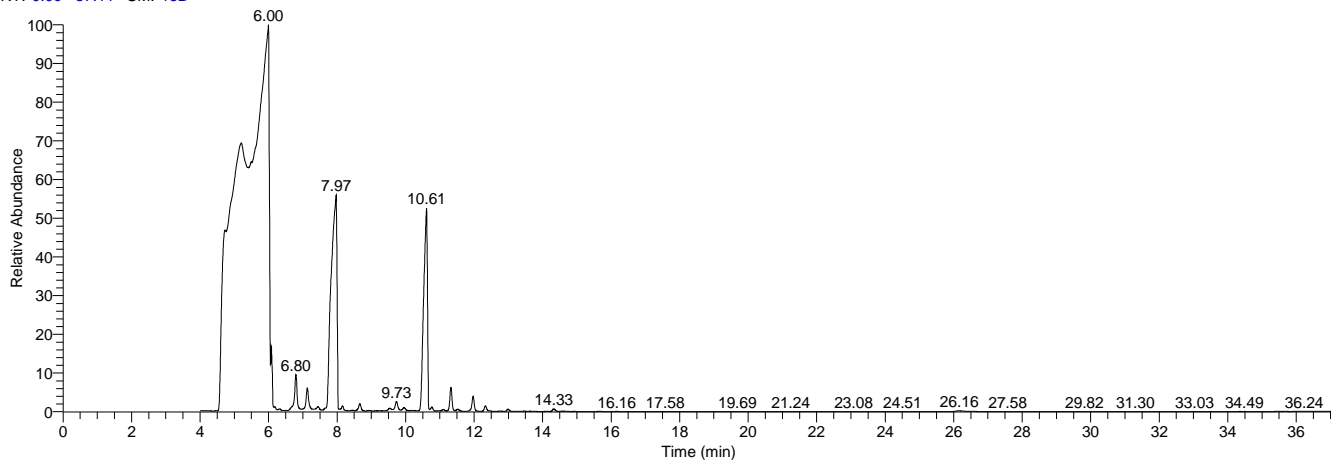

NL:  
2.70E9  
TIC MS  
peppermint  
\_oil

| RT    | Area % | Peak Area      | Peak Height   |
|-------|--------|----------------|---------------|
| 4.68  | 8.42   | 4063067884.30  | 501024703.52  |
| 4.88  | 0.24   | 114931501.35   | 29943849.73   |
| 5.19  | 4.91   | 2368487049.80  | 192050196.78  |
| 6.01  | 26.41  | 12739183474.35 | 1988600551.22 |
| 6.09  | 1.63   | 785413160.64   | 372819888.67  |
| 6.80  | 1.94   | 937648855.46   | 262990672.27  |
| 7.13  | 1.32   | 634605734.41   | 158927031.10  |
| 7.98  | 32.76  | 15802629814.66 | 1448062177.76 |
| 8.16  | 0.21   | 102338294.49   | 34126440.78   |
| 8.67  | 0.46   | 223501444.15   | 52989470.49   |
| 9.73  | 0.58   | 279985605.09   | 63142981.17   |
| 10.62 | 18.48  | 8915803583.91  | 1374122019.40 |
| 11.32 | 1.41   | 680176010.03   | 181532778.35  |
| 11.97 | 0.88   | 423518845.05   | 110511938.85  |
| 12.33 | 0.34   | 163893944.46   | 39601044.18   |

peppermint\_oil #203 RT: 4.68 AV: 1 NL: 1.68E8  
T: + c EI Full ms [50.000-750.000]

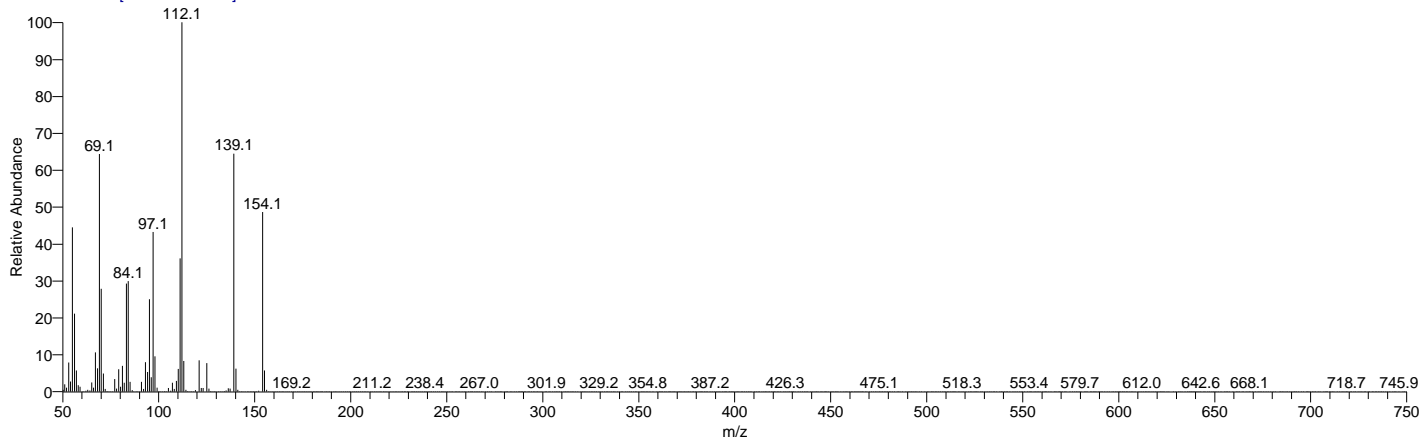

| RT   | Compound Name                                       | Area % | MF  | Molecular Formula | Molecular Weight | Cas #       | Library |
|------|-----------------------------------------------------|--------|-----|-------------------|------------------|-------------|---------|
| 4.68 | Cyclohexanone,<br>5-methyl-2-(1-methylethyl)-, cis- | 8.42   | 945 | C10H18O           | 154              | 491-07-6    | replib  |
| 4.68 | 1-Menthone                                          | 8.42   | 955 | C10H18O           | 154              | 14073-9-7-3 | mainlib |

# My GC-MS Report

| RT   | Compound Name                                      | Area % | MF  | Molecular Formula | Molecular Weight | Cas #    | Library         |
|------|----------------------------------------------------|--------|-----|-------------------|------------------|----------|-----------------|
| 4.68 | CYCLOHEXANONE, 5-METHYL-2-(1-METHYLETHYL)-, TRANS- | 8.42   | 935 | C10H18O           | 154              | 89-80-5  | WileyRegistry8e |
| 4.68 | CYCLOHEXANONE, 5-METHYL-2-(1-METHYLETHYL)-, CIS-   | 8.42   | 936 | C10H18O           | 154              | 491-07-6 | WileyRegistry8e |
| 4.68 | Cyclohexanone, 5-methyl-2-(1-methylethyl)-, cis-   | 8.42   | 941 | C10H18O           | 154              | 491-07-6 | replib          |

## Compound Structure

## Hit Spectrum

Cyclohexanone, 5-methyl-2-(1-methylethyl)-, cis-  
Formula C10H18O, MW 154, CAS# 491-07-6, Entry# 17708  
p-Menthane-3-one, cis-

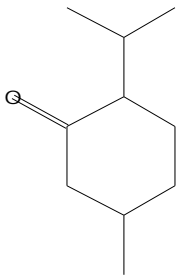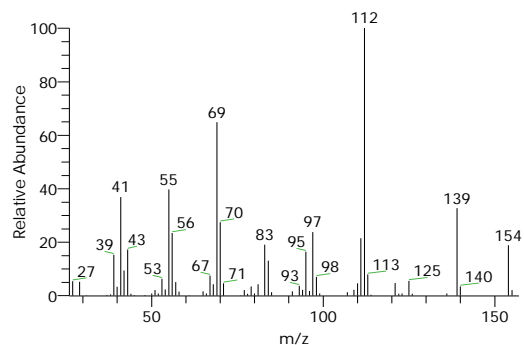

I-Menthone  
Formula C10H18O, MW 154, CAS# 14073-97-3, Entry# 89414  
Cyclohexanone, 5-methyl-2-(1-methylethyl)-, (2S-trans)-

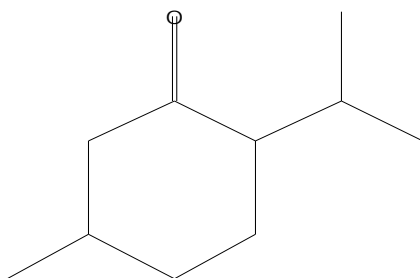

SI 935, RSI 955, mainlib, Entry# 89414, CAS# 14073-97-3, I-Menthone

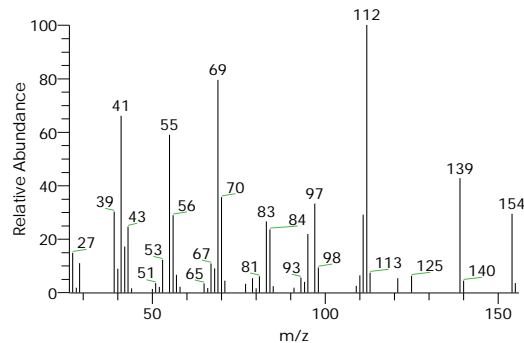

CYCLOHEXANONE, 5-METHYL-2-(1-METHYLETHYL)-, TRANS-  
Formula C10H18O, MW 154, CAS# 89-80-5, Entry# 38733  
2-ISOPROPYL-5-METHYLCYCLOHEXANONE #

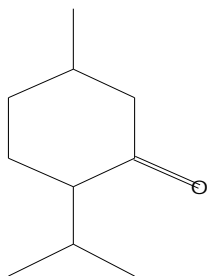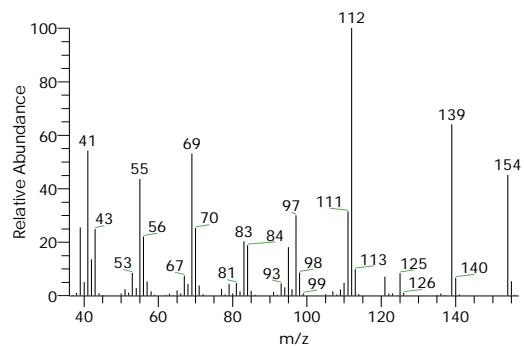

CYCLOHEXANONE, 5-METHYL-2-(1-METHYLETHYL)-, CIS-  
Formula C10H18O, MW 154, CAS# 491-07-6, Entry# 38412  
(1)-ISOMENTHONE

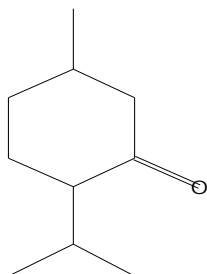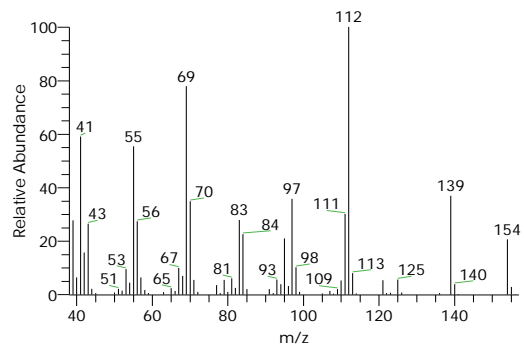

# My GC-MS Report

Compound Structure

Hit Spectrum

Cyclohexanone, 5-methyl-2-(1-methylethyl)-, cis-  
Formula C10H18O, MW 154, CAS# 491-07-6, Entry# 1370  
p-Menthan-3-one, cis-

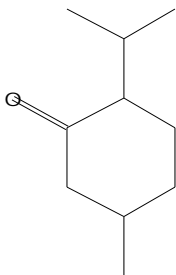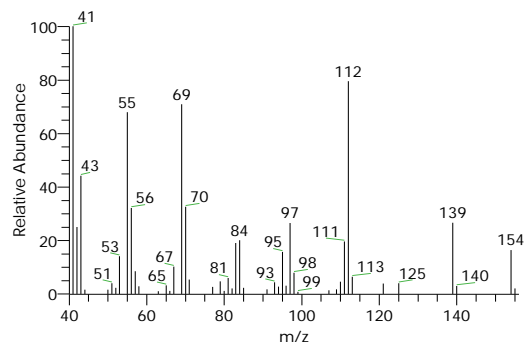

peppermint\_oil #264 RT: 4.88 AV: 1 NL: 2.02E8  
T: + c EI Full ms [50.000-750.000]

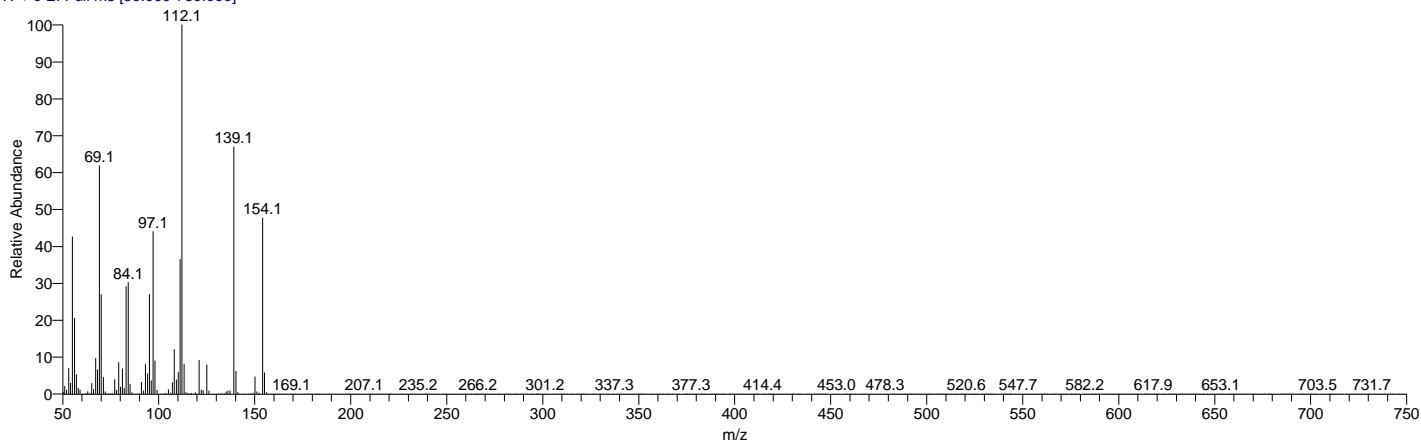

| RT   | Compound Name                                      | Area % | MF  | Molecular Formula | Molecular Weight | Cas #      | Library         |
|------|----------------------------------------------------|--------|-----|-------------------|------------------|------------|-----------------|
| 4.88 | l-Menthone                                         | 0.24   | 956 | C10H18O           | 154              | 14073-97-3 | mainlib         |
| 4.88 | Cyclohexanone, 5-methyl-2-(1-methylethyl)-, cis-   | 0.24   | 937 | C10H18O           | 154              | 491-07-6   | replib          |
| 4.88 | CYCLOHEXANONE, 5-METHYL-2-(1-METHYLETHYL)-, CIS-   | 0.24   | 915 | C10H18O           | 154              | 491-07-6   | WileyRegistry8e |
| 4.88 | CYCLOHEXANONE, 5-METHYL-2-(1-METHYLETHYL)-, TRANS- | 0.24   | 908 | C10H18O           | 154              | 89-80-5    | WileyRegistry8e |
| 4.88 | CYCLOHEXANONE, 5-METHYL-2-(1-METHYLETHYL)-, TRANS- | 0.24   | 904 | C10H18O           | 154              | 89-80-5    | WileyRegistry8e |

Compound Structure

Hit Spectrum

l-Menthone  
Formula C10H18O, MW 154, CAS# 14073-97-3, Entry# 89414  
Cyclohexanone, 5-methyl-2-(1-methylethyl)-, (2S-trans)-

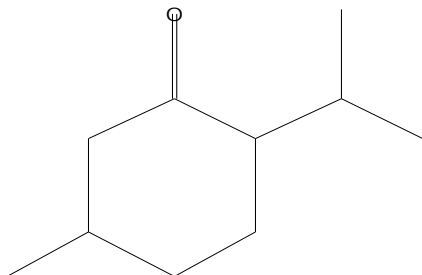

SI 917, RSI 956, mainlib, Entry# 89414, CAS# 14073-97-3, l-Menthone

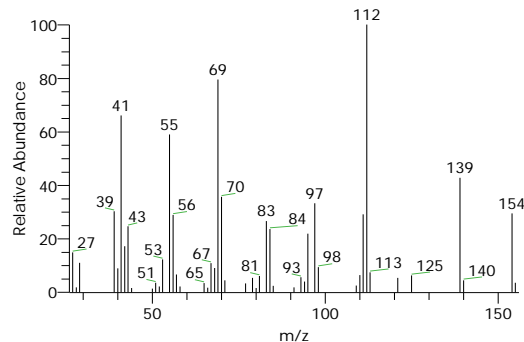

# My GC-MS Report

Compound Structure

Hit Spectrum

Cyclohexanone, 5-methyl-2-(1-methylethyl)-, cis-  
Formula C<sub>10</sub>H<sub>18</sub>O, MW 154, CAS# 491-07-6, Entry# 17708  
p-Menthan-3-one, cis-

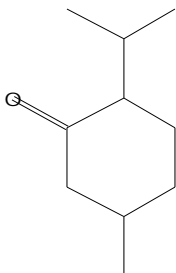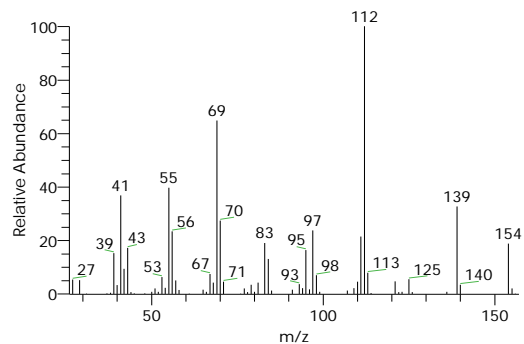

CYCLOHEXANONE, 5-METHYL-2-(1-METHYLETHYL)-, CIS-  
Formula C<sub>10</sub>H<sub>18</sub>O, MW 154, CAS# 491-07-6, Entry# 38412  
(1)-ISOMENTHONE

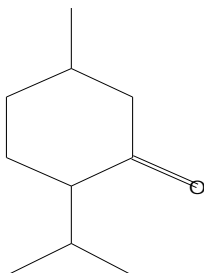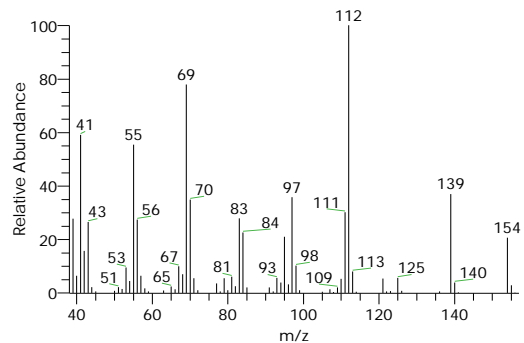

CYCLOHEXANONE, 5-METHYL-2-(1-METHYLETHYL)-, TRANS-  
Formula C<sub>10</sub>H<sub>18</sub>O, MW 154, CAS# 89-80-5, Entry# 38733  
2-ISOPROPYL-5-METHYLCYCLOHEXANONE #

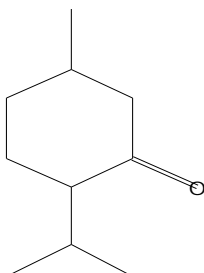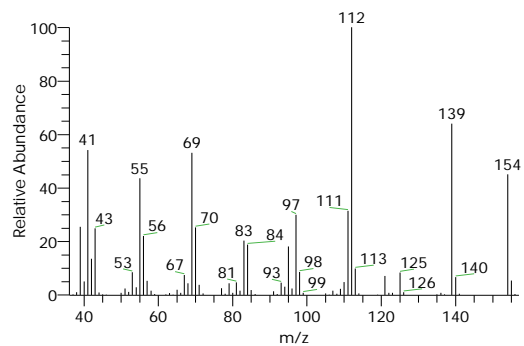

CYCLOHEXANONE, 5-METHYL-2-(1-METHYLETHYL)-, TRANS-  
Formula C<sub>10</sub>H<sub>18</sub>O, MW 154, CAS# 89-80-5, Entry# 38426  
2-ISOPROPYL-5-METHYLCYCLOHEXANONE #

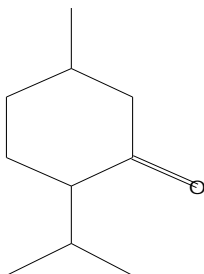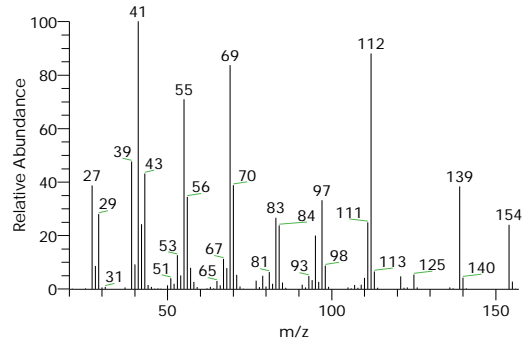

# My GC-MS Report

peppermint\_oil #355 RT: 5.19 AV: 1 NL: 2.52E8  
T: + c EI Full ms [50.000-750.000]

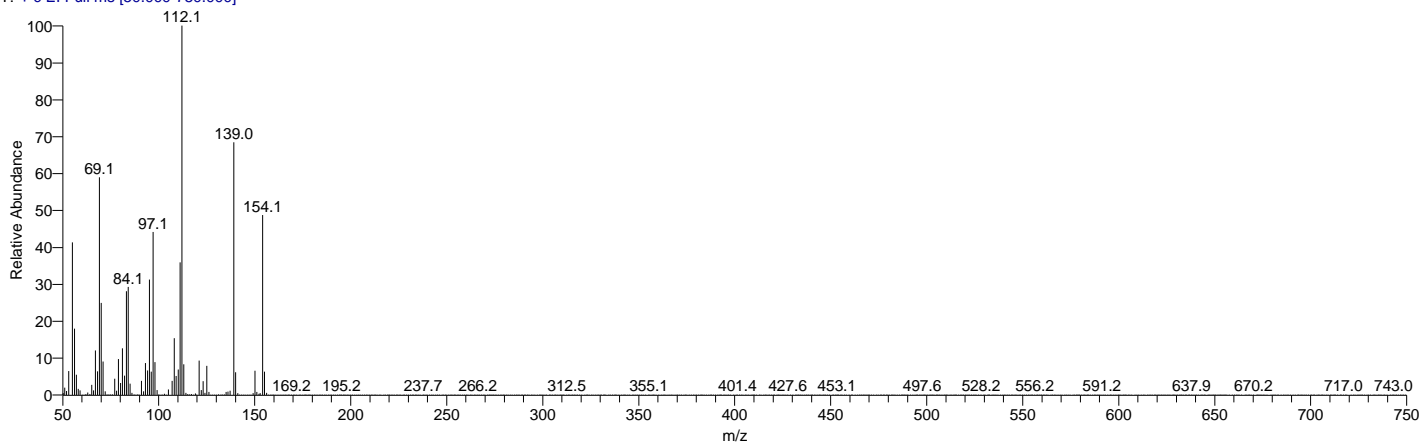

| RT   | Compound Name                                       | Area % | MF  | Molecular Formula | Molecular Weight | Cas #          | Library             |
|------|-----------------------------------------------------|--------|-----|-------------------|------------------|----------------|---------------------|
| 5.19 | l-Menthone                                          | 4.91   | 944 | C10H18O           | 154              | 14073-9<br>7-3 | mainlib             |
| 5.19 | Cyclohexanone,<br>5-methyl-2-(1-methylethyl)-       | 4.91   | 912 | C10H18O           | 154              | 10458-1<br>4-7 | mainlib             |
| 5.19 | CYCLOHEXANONE,<br>5-METHYL-2-(1-METHYLETHYL<br>)-   | 4.91   | 912 | C10H18O           | 154              | 10458-1<br>4-7 | WileyRegi<br>stry8e |
| 5.19 | Cyclohexanone,<br>5-methyl-2-(1-methylethyl)-, cis- | 4.91   | 914 | C10H18O           | 154              | 491-07<br>-6   | replib              |
| 5.19 | Cyclohexanone,<br>5-methyl-2-(1-methylethyl)-, cis- | 4.91   | 921 | C10H18O           | 154              | 491-07<br>-6   | replib              |

Compound Structure

Hit Spectrum

l-Menthone  
Formula C10H18O, MW 154, CAS# 14073-97-3, Entry# 89414  
Cyclohexanone, 5-methyl-2-(1-methylethyl)-, (2S-trans)-

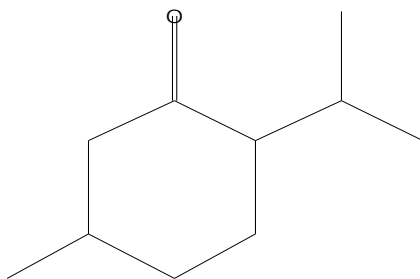

SI 894, RSI 944, mainlib, Entry# 89414, CAS# 14073-97-3, l-Menthone

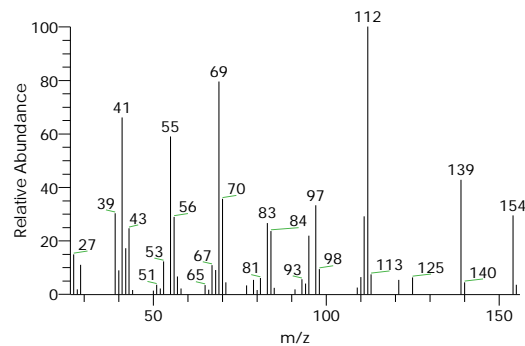

Cyclohexanone, 5-methyl-2-(1-methylethyl)-  
Formula C10H18O, MW 154, CAS# 10458-14-7, Entry# 89410  
p-Menthan-3-one

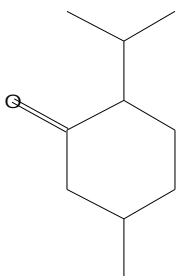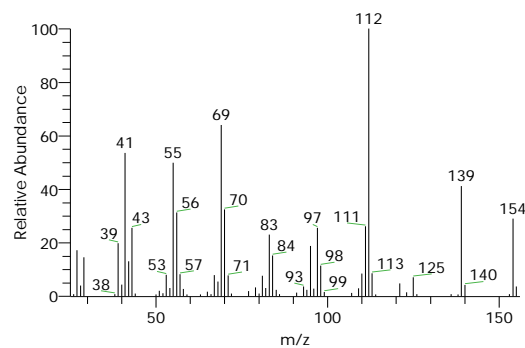

# My GC-MS Report

Compound Structure

Hit Spectrum

CYCLOHEXANONE, 5-METHYL-2-(1-METHYLETHYL)-  
 Formula C<sub>10</sub>H<sub>18</sub>O, MW 154, CAS# 10458-14-7, Entry# 373487  
 2-ISOPROPYL-5-METHYLCYCLOHEXANONE

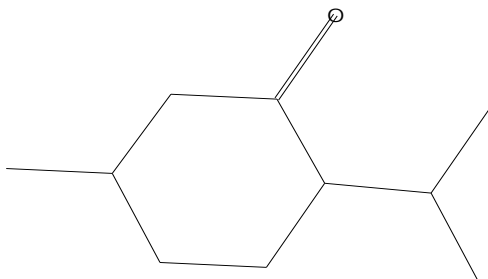

Cyclohexanone, 5-methyl-2-(1-methylethyl)-, cis-  
 Formula C<sub>10</sub>H<sub>18</sub>O, MW 154, CAS# 491-07-6, Entry# 17708  
 p-Menthan-3-one, cis-

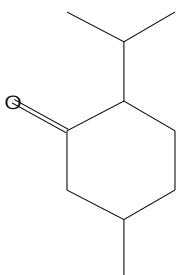

Cyclohexanone, 5-methyl-2-(1-methylethyl)-, cis-  
 Formula C<sub>10</sub>H<sub>18</sub>O, MW 154, CAS# 491-07-6, Entry# 1370  
 p-Menthan-3-one, cis-

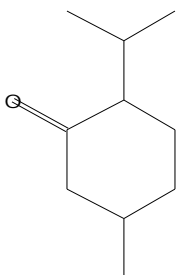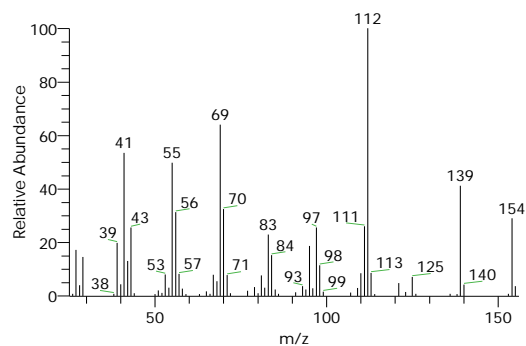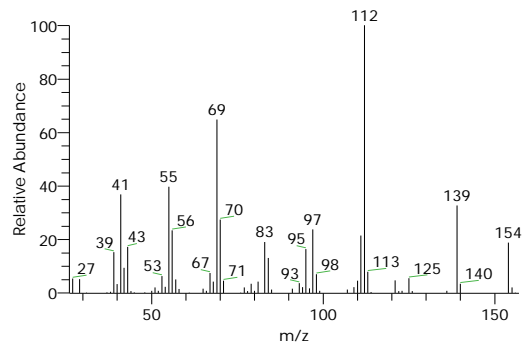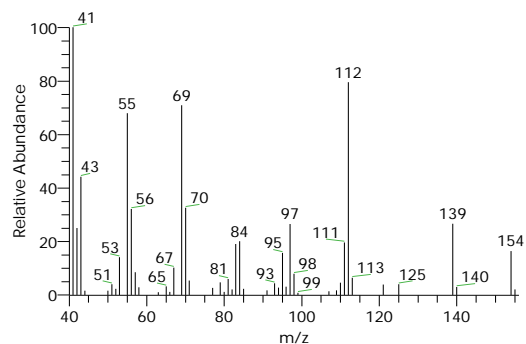

peppermint\_oil #599 RT: 6.01 AV: 1 NL: 3.67E8  
 T: + c EI Full ms [50.000-750.000]

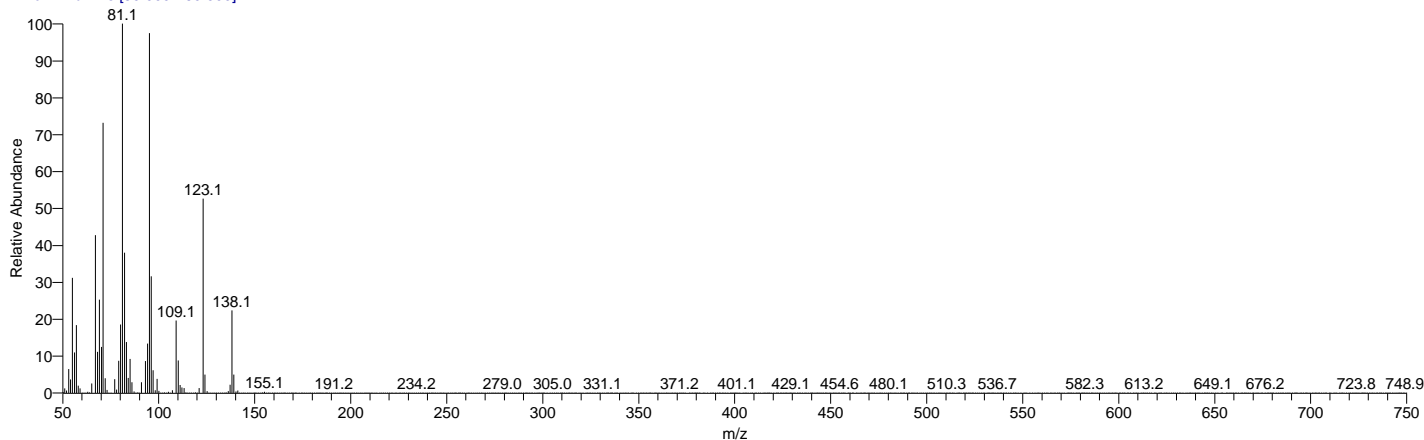

| RT   | Compound Name                                                 | Area % | MF  | Molecular Formula                 | Molecular Weight | Cas #   | Library             |
|------|---------------------------------------------------------------|--------|-----|-----------------------------------|------------------|---------|---------------------|
| 6.01 | Levomenthol                                                   | 26.41  | 937 | C <sub>10</sub> H <sub>20</sub> O | 156              | 2216-5  | replib              |
| 6.01 | CYCLOHEXANOL,<br>5-METHYL-2-(1-METHYLETHYL)<br>-, (1à,2á,5à)- | 26.41  | 926 | C <sub>10</sub> H <sub>20</sub> O | 156              | 89-78-1 | WileyRegi<br>stry8e |

# My GC-MS Report

| RT   | Compound Name                                                    | Area % | MF  | Molecular Formula | Molecular Weight | Cas #   | Library             |
|------|------------------------------------------------------------------|--------|-----|-------------------|------------------|---------|---------------------|
| 6.01 | Levomenthol                                                      | 26.41  | 928 | C10H20O           | 156              | 2216-5  | replib              |
| 6.01 | Cyclohexanol,<br>5-methyl-2-(1-methylethyl)-,<br>(1à,2à,5à)-(ñ)- | 26.41  | 925 | C10H20O           | 156              | 15356-7 | mainlib             |
| 6.01 | 2-ISOPROPYL-5-METHYLCYCLO<br>HEXANOL #                           | 26.41  | 924 | C10H20O           | 156              | 15356-7 | WileyRegi<br>stry8e |

## Compound Structure

## Hit Spectrum

Levomenthol  
Formula C10H20O, MW 156, CAS# 2216-51-5, Entry# 9225  
Cyclohexanol, 5-methyl-2-(1-methylethyl)-, [1R-(1à,2à,5à)]-

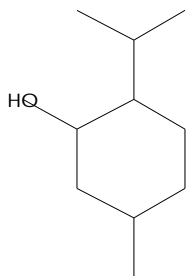

SI 935, RSI 937, replib, Entry# 9225, CAS# 2216-51-5, Levomenthol

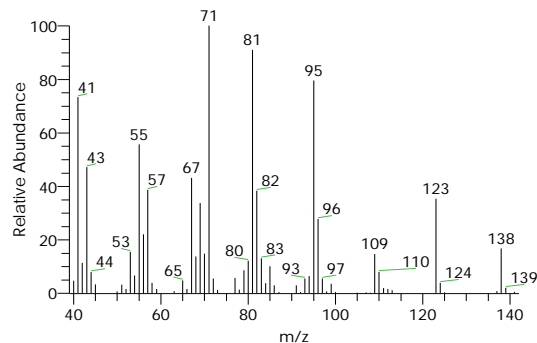

CYCLOHEXANOL, 5-METHYL-2-(1-METHYLETHYL)-, (1à,2à,5à)-  
Formula C10H20O, MW 156, CAS# 89-78-1, Entry# 394892  
(+)-(1R\*,3R\*,4S\*)-MENTHOL

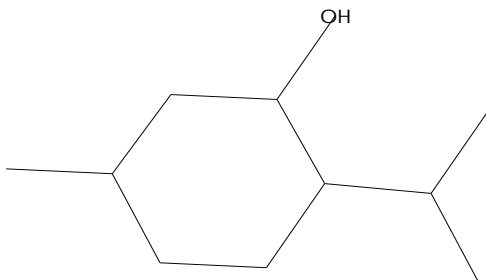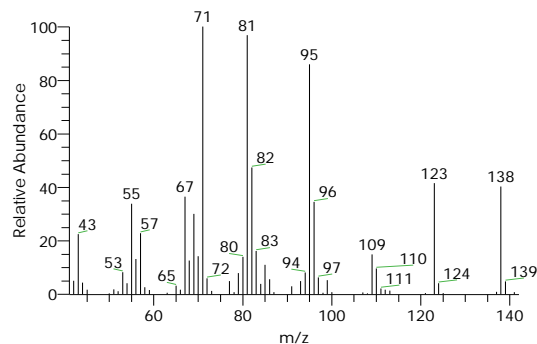

Levomenthol  
Formula C10H20O, MW 156, CAS# 2216-51-5, Entry# 11525  
Cyclohexanol, 5-methyl-2-(1-methylethyl)-, [1R-(1à,2à,5à)]-

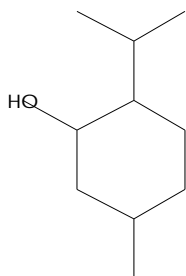

SI 921, RSI 928, replib, Entry# 11525, CAS# 2216-51-5, Levomenthol

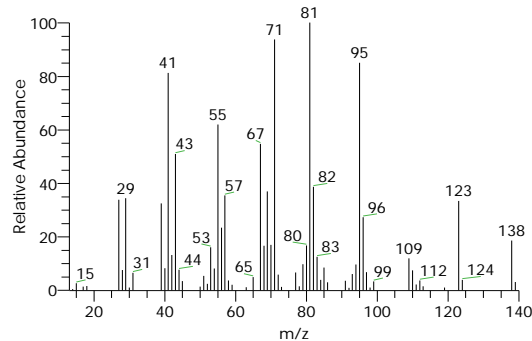

Cyclohexanol, 5-methyl-2-(1-methylethyl)-, (1à,2à,5à)-(ñ)-  
Formula C10H20O, MW 156, CAS# 15356-70-4, Entry# 38982  
Menthol, (ñ)-

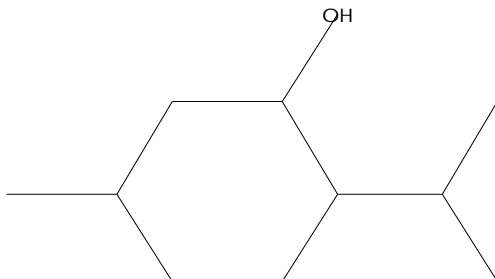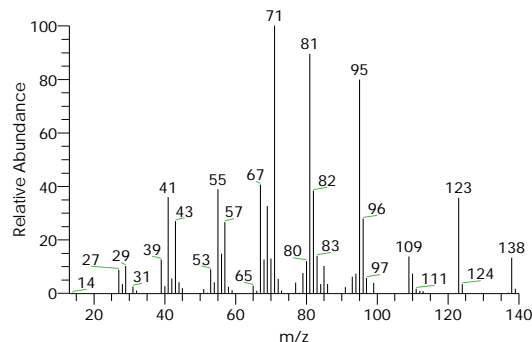

# My GC-MS Report

Compound Structure

Hit Spectrum

2-ISOPROPYL-5-METHYLCYCLOHEXANOL #  
 Formula C<sub>10</sub>H<sub>20</sub>O, MW 156, CAS# 15356-70-4, Entry# 40741  
 (+-)-(1R\*,3R\*,4S\*)-MENTHOL

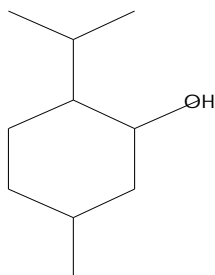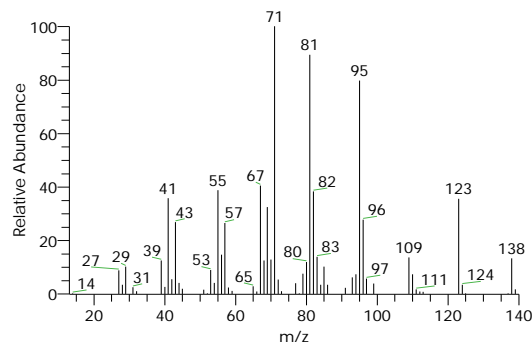

peppermint\_oil #624 RT: 6.09 AV: 1 NL: 7.81E7  
 T: + c EI Full ms [50.000-750.000]

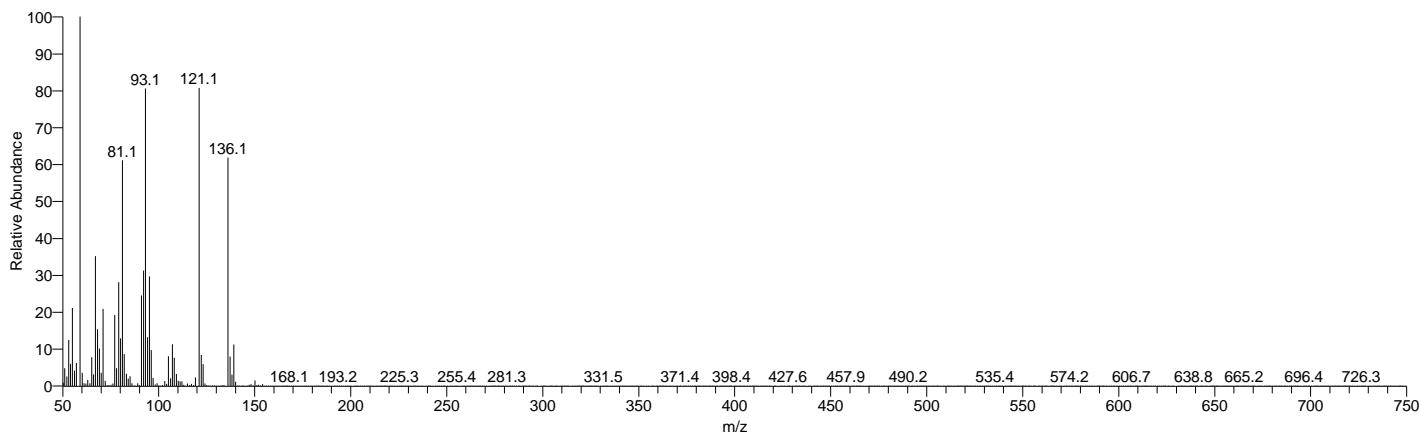

| RT   | Compound Name                                    | Area % | MF  | Molecular Formula                 | Molecular Weight | Cas #       | Library             |
|------|--------------------------------------------------|--------|-----|-----------------------------------|------------------|-------------|---------------------|
| 6.09 | (-)-(1S,2R,4R)-BETA-FENCHOL                      | 1.63   | 907 | C <sub>10</sub> H <sub>18</sub> O | 154              | 470-08-6    | WileyRegi<br>stry8e |
| 6.09 | 3-CYCLOHEXENE-1-METHANOL, à,à,4-TRIMETHYL-       | 1.63   | 903 | C <sub>10</sub> H <sub>18</sub> O | 154              | 98-55-5     | WileyRegi<br>stry8e |
| 6.09 | 3-CYCLOHEXENE-1-METHANOL, à,à,4-TRIMETHYL-, (S)- | 1.63   | 903 | C <sub>10</sub> H <sub>18</sub> O | 154              | 10482-5-6-1 | WileyRegi<br>stry8e |
| 6.09 | L-à-Terpineol                                    | 1.63   | 899 | C <sub>10</sub> H <sub>18</sub> O | 154              | 10482-5-6-1 | replib              |
| 6.09 | (+)-ALPHA-TERPINEOL (P-MENTH-1-EN-8-OL)          | 1.63   | 898 | C <sub>10</sub> H <sub>18</sub> O | 154              | NA          | WileyRegi<br>stry8e |

Compound Structure

Hit Spectrum

(-)-(1S,2R,4R)-BETA-FENCHOL  
 Formula C<sub>10</sub>H<sub>18</sub>O, MW 154, CAS# 470-08-6, Entry# 38737  
 (-)-BETA-FENCHOL

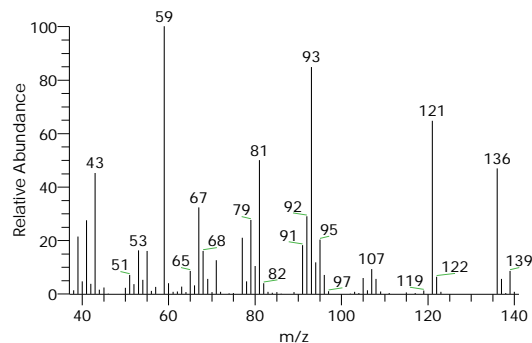



# My GC-MS Report

Compound Structure

Hit Spectrum

3-CYCLOHEXENE-1-METHANOL,  $\alpha,\alpha,4$ -TRIMETHYL-  
Formula C<sub>10</sub>H<sub>18</sub>O, MW 154, CAS# 98-55-5, Entry# 38742  
3-CYCLOHEXENE-1-METHANOL,  $\alpha,\alpha,4$ -TRIMETHYL-, (S)-

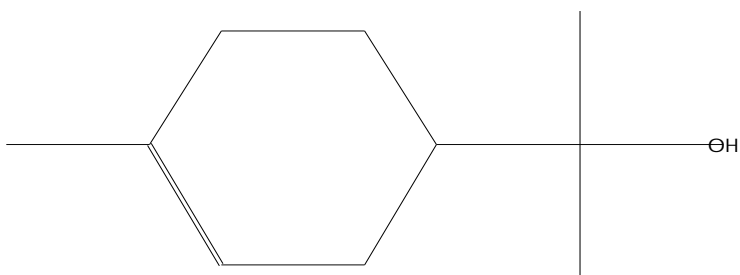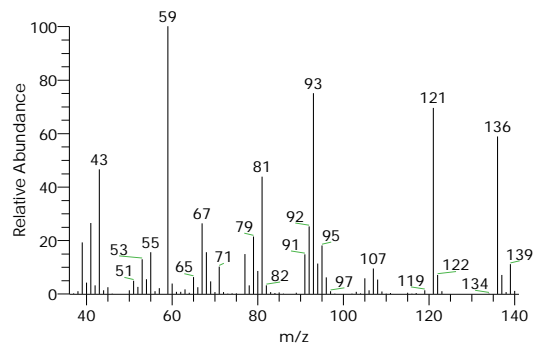

3-CYCLOHEXENE-1-METHANOL,  $\alpha,\alpha,4$ -TRIMETHYL-, (S)-  
Formula C<sub>10</sub>H<sub>18</sub>O, MW 154, CAS# 10482-56-1, Entry# 38379  
2-(4-METHYL-3-CYCLOHEXEN-1-YL)-2-PROPANOL #

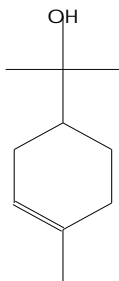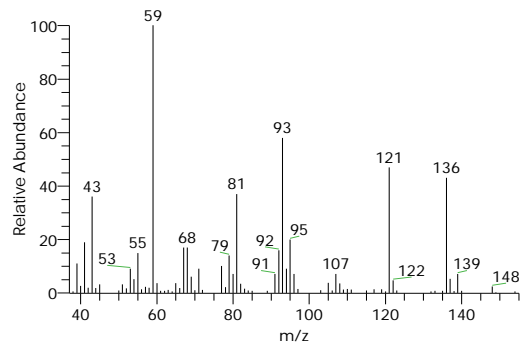

L- $\alpha$ -Terpineol  
Formula C<sub>10</sub>H<sub>18</sub>O, MW 154, CAS# 10482-56-1, Entry# 7441  
3-Cyclohexene-1-methanol,  $\alpha,\alpha,4$ -trimethyl-, (S)-

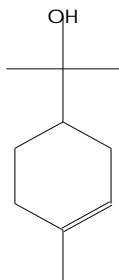

SI 893, RSI 899, replib, Entry# 7441, CAS# 10482-56-1, L- $\alpha$ -Terpineol

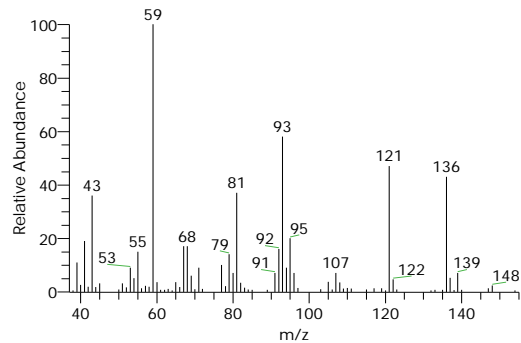

(+)-ALPHA-TERPINEOL (P-MENTH-1-EN-8-OL)  
Formula C<sub>10</sub>H<sub>18</sub>O, MW 154, CAS# NA, Entry# 383373  
2-(4-METHYL-3-CYCLOHEXEN-1-YL)-2-PROPANOL

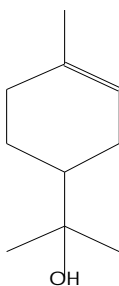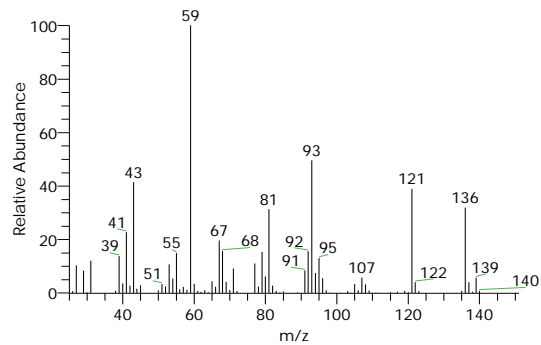

# My GC-MS Report

peppermint\_oil #836 RT: 6.80 AV: 1 NL: 5.27E7  
T: + c EI Full ms [50.000-750.000]

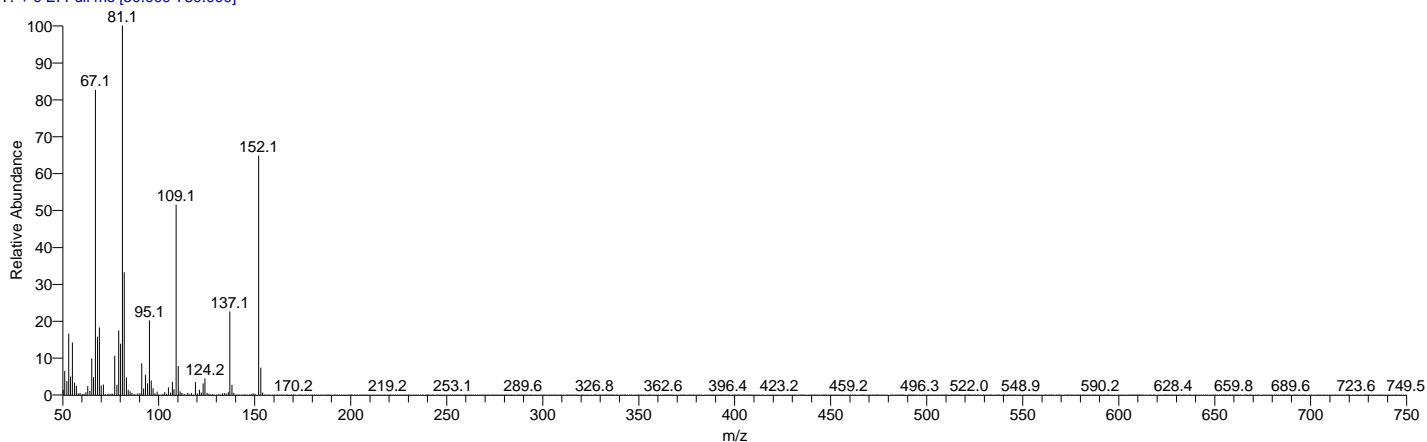

| RT   | Compound Name                                         | Area % | MF  | Molecular Formula | Molecular Weight | Cas #       | Library         |
|------|-------------------------------------------------------|--------|-----|-------------------|------------------|-------------|-----------------|
| 6.80 | Cyclohexanone, 5-methyl-2-(1-methylethylidene)-       | 1.94   | 931 | C10H16O           | 152              | 15932-8-0-6 | replib          |
| 6.80 | 2-ISOPROPYLIDENE-5-METHYL-CYCLOHEXANONE               | 1.94   | 931 | C10H16O           | 152              | NA          | WileyRegistry8e |
| 6.80 | CIS-ISOPULEGONE                                       | 1.94   | 922 | C10H16O           | 152              | NA          | WileyRegistry8e |
| 6.80 | CYCLOHEXANONE, 5-METHYL-2-(1-METHYLETHYLIDENE)-, (R)- | 1.94   | 919 | C10H16O           | 152              | 89-82-7     | WileyRegistry8e |
| 6.80 | CYCLOHEXANONE, 5-METHYL-2-(1-METHYLETHYLIDENE)-       | 1.94   | 915 | C10H16O           | 152              | 15932-8-0-6 | WileyRegistry8e |

Compound Structure

Hit Spectrum

Cyclohexanone, 5-methyl-2-(1-methylethylidene)-  
Formula C10H16O, MW 152, CAS# 15932-80-6, Entry# 11655  
p-Menth-4(8)-en-3-one

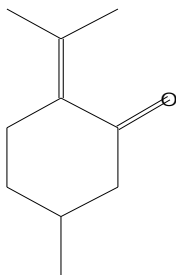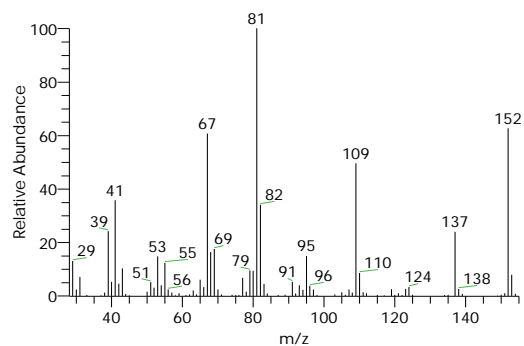

2-ISOPROPYLIDENE-5-METHYL-CYCLOHEXANONE  
Formula C10H16O, MW 152, CAS# NA, Entry# 370741  
5-METHYL-2-(1-METHYLETHYLIDENE)CYCLOHEXANONE

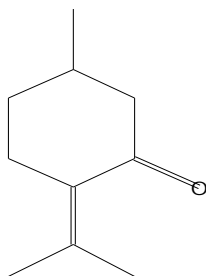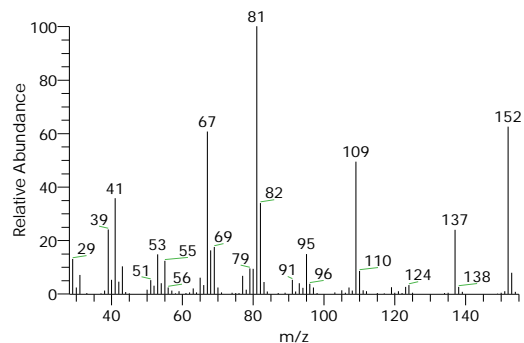

# My GC-MS Report

Compound Structure

Hit Spectrum

CIS-ISOPULEGONE  
Formula C<sub>10</sub>H<sub>16</sub>O, MW 152, CAS# NA, Entry# 36394

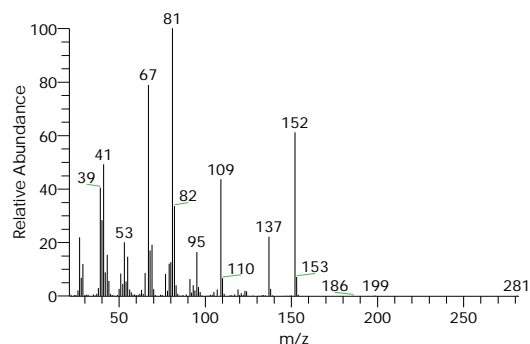

CYCLOHEXANONE, 5-METHYL-2-(1-METHYLETHYLIDENE)-, (R)-  
Formula C<sub>10</sub>H<sub>16</sub>O, MW 152, CAS# 89-82-7, Entry# 36050  
5-METHYL-2-(1-METHYLETHYLIDENE)CYCLOHEXANONE #

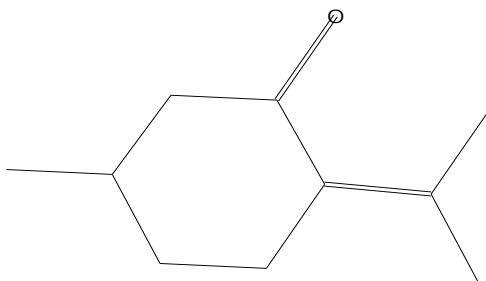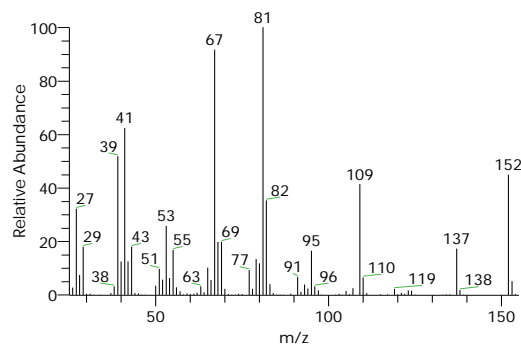

CYCLOHEXANONE, 5-METHYL-2-(1-METHYLETHYLIDENE)-  
Formula C<sub>10</sub>H<sub>16</sub>O, MW 152, CAS# 15932-80-6, Entry# 36046  
5-METHYL-2-(1-METHYLETHYLIDENE)CYCLOHEXANONE #

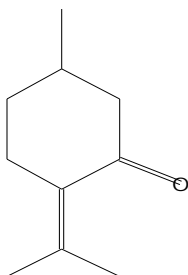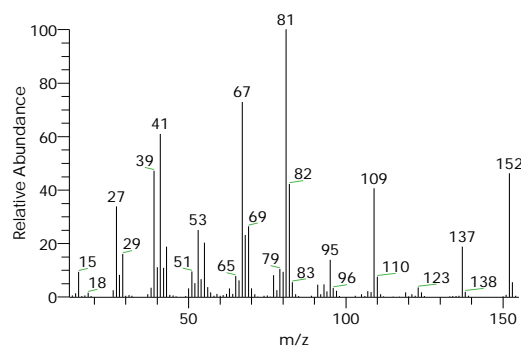

peppermint\_oil #934 RT: 7.13 AV: 1 NL: 3.48E7  
T: + c EI Full ms [50.000-750.000]

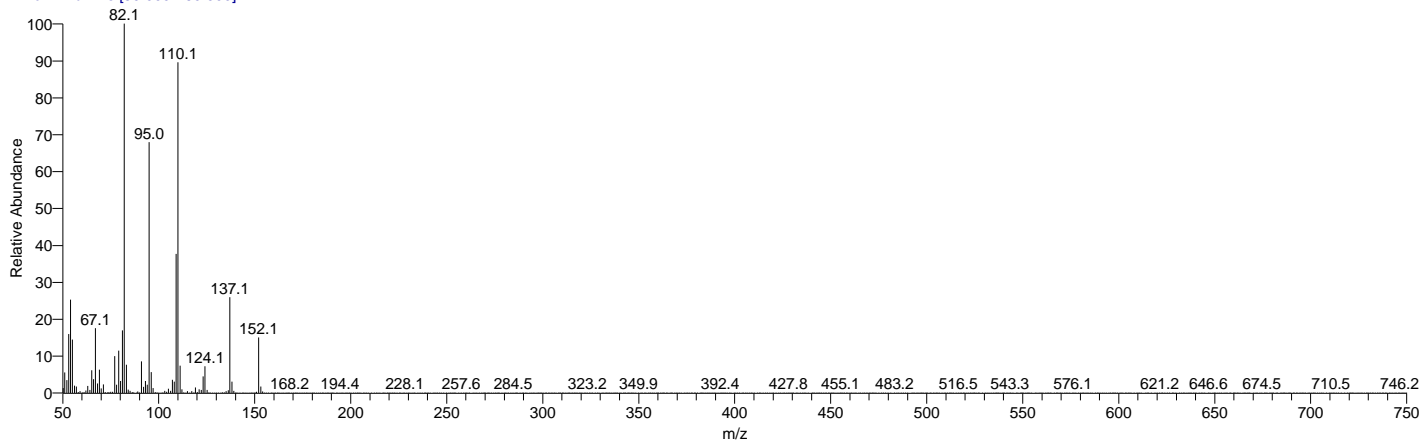

| RT   | Compound Name                                          | Area % | MF  | Molecular Formula                 | Molecular Weight | Cas #   | Library             |
|------|--------------------------------------------------------|--------|-----|-----------------------------------|------------------|---------|---------------------|
| 7.13 | 2-CYCLOHEXEN-1-ONE,<br>3-METHYL-6-(1-METHYLETHYL<br>)- | 1.32   | 914 | C <sub>10</sub> H <sub>16</sub> O | 152              | 89-81-6 | WileyRegi<br>stry8e |
| 7.13 | 2-Cyclohexen-1-one,<br>3-methyl-6-(1-methylethyl)-     | 1.32   | 926 | C <sub>10</sub> H <sub>16</sub> O | 152              | 89-81-6 | replib              |

# My GC-MS Report

| RT   | Compound Name                                          | Area % | MF  | Molecular Formula | Molecular Weight | Cas #   | Library             |
|------|--------------------------------------------------------|--------|-----|-------------------|------------------|---------|---------------------|
| 7.13 | 2-Cyclohexen-1-one,<br>3-methyl-6-(1-methylethyl)-     | 1.32   | 912 | C10H16O           | 152              | 89-81-6 | replib              |
| 7.13 | 2-CYCLOHEXEN-1-ONE,<br>3-METHYL-6-(1-METHYLETHYL<br>)- | 1.32   | 903 | C10H16O           | 152              | 89-81-6 | WileyRegi<br>stry8e |
| 7.13 | 2-Cyclohexen-1-one,<br>3-methyl-6-(1-methylethyl)-     | 1.32   | 896 | C10H16O           | 152              | 89-81-6 | mainlib             |

## Compound Structure

## Hit Spectrum

2-CYCLOHEXEN-1-ONE, 3-METHYL-6-(1-METHYLETHYL)-  
Formula C10H16O, MW 152, CAS# 89-81-6, Entry# 35991  
6-ISOPROPYL-3-METHYL-2-CYCLOHEXEN-1-ONE #

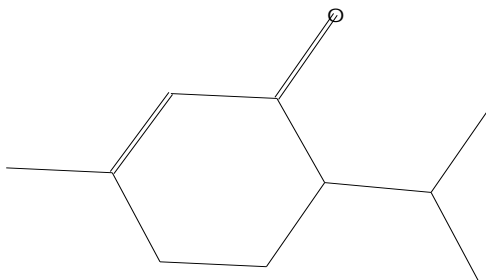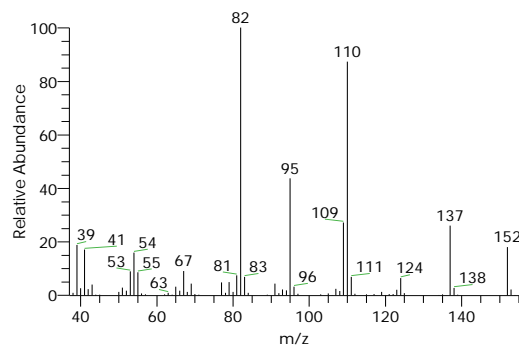

2-Cyclohexen-1-one, 3-methyl-6-(1-methylethyl)-  
Formula C10H16O, MW 152, CAS# 89-81-6, Entry# 17471  
p-Menth-1-en-3-one

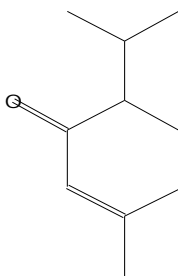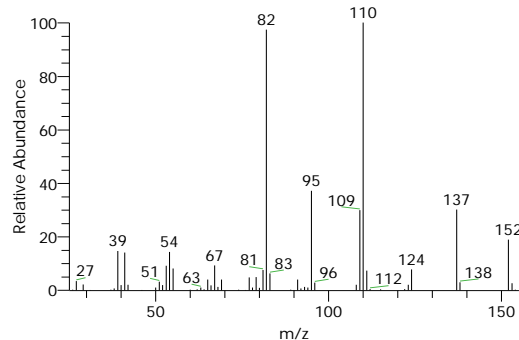

2-Cyclohexen-1-one, 3-methyl-6-(1-methylethyl)-  
Formula C10H16O, MW 152, CAS# 89-81-6, Entry# 11813  
p-Menth-1-en-3-one

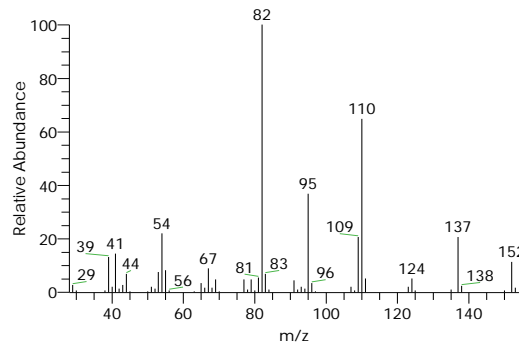

2-CYCLOHEXEN-1-ONE, 3-METHYL-6-(1-METHYLETHYL)-  
Formula C10H16O, MW 152, CAS# 89-81-6, Entry# 35994  
6-ISOPROPYL-3-METHYL-2-CYCLOHEXEN-1-ONE #

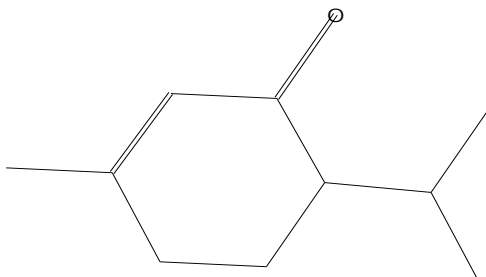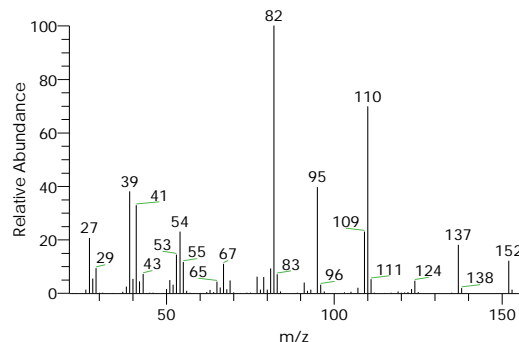

# My GC-MS Report

Compound Structure

Hit Spectrum

2-Cyclohexen-1-one, 3-methyl-6-(1-methylethyl)-  
Formula C10H16O, MW 152, CAS# 89-81-6, Entry# 51632  
p-Menth-1-en-3-one

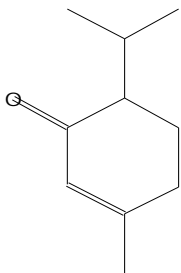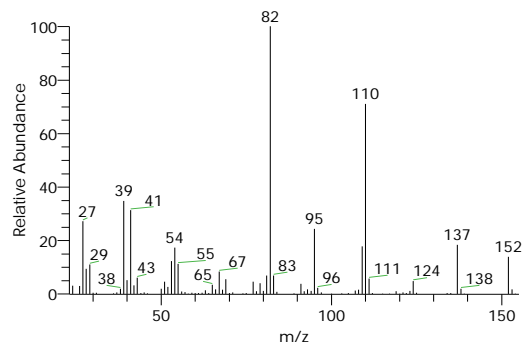

peppermint\_oil #1188 RT: 7.98 AV: 1 NL: 3.00E8  
T: + c EI Full ms [50.000-750.000]

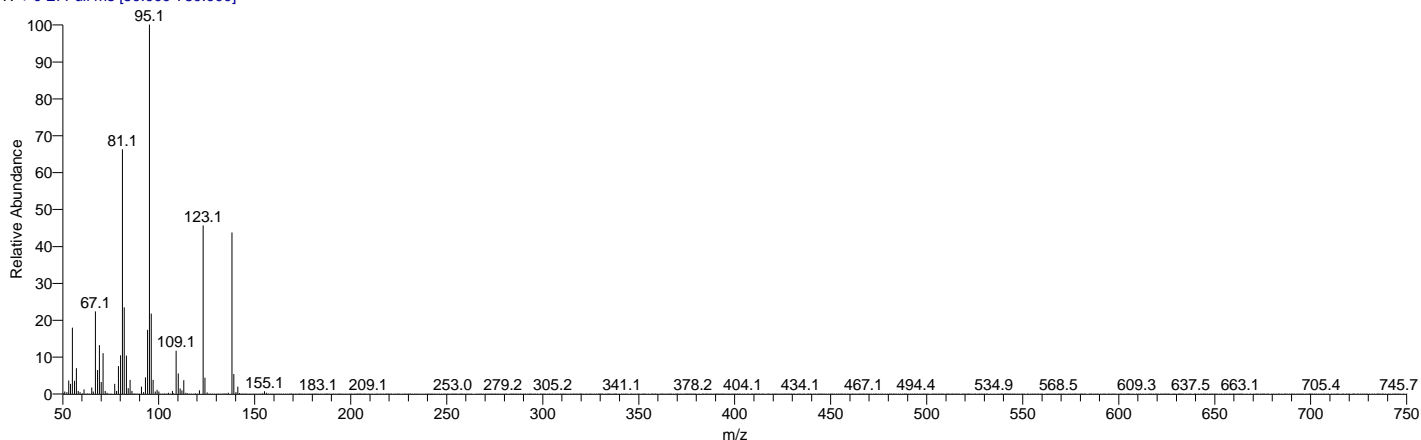

| RT   | Compound Name                                      | Area % | MF  | Molecular Formula | Molecular Weight | Cas #   | Library         |
|------|----------------------------------------------------|--------|-----|-------------------|------------------|---------|-----------------|
| 7.98 | Cyclohexanol, 5-methyl-2-(1-methylethyl)-, acetate | 32.76  | 967 | C12H22O2          | 198              | 16409-4 | replib          |
| 7.98 | CYCLOHEXANOL, 5-METHYL-2-(1-METHYLETHYL)-, ACETATE | 32.76  | 959 | C12H22O2          | 198              | 2623-2  | WileyRegistry8e |
| 7.98 | Menthyl acetate                                    | 32.76  | 951 | C12H22O2          | 198              | 89-48-5 | mainlib         |
| 7.98 | Menthyl acetate                                    | 32.76  | 948 | C12H22O2          | 198              | 89-48-5 | replib          |
| 7.98 | CYCLOHEXANOL, 5-METHYL-2-(1-METHYLETHYL)-, ACETATE | 32.76  | 948 | C12H22O2          | 198              | 16409-4 | WileyRegistry8e |

Compound Structure

Hit Spectrum

Cyclohexanol, 5-methyl-2-(1-methylethyl)-, acetate  
Formula C12H22O2, MW 198, CAS# 16409-45-3, Entry# 14465  
Menthol, acetate

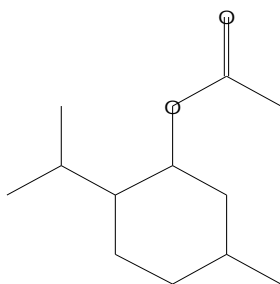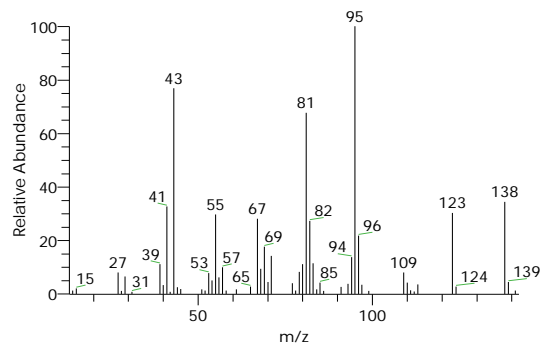

# My GC-MS Report

Compound Structure

Hit Spectrum

CYCLOHEXANOL, 5-METHYL-2-(1-METHYLETHYL)-, ACETATE  
Formula C<sub>12</sub>H<sub>22</sub>O<sub>2</sub>, MW 198, CAS# 2623-23-6, Entry# 82542  
CYCLOHEXANOL, 5-METHYL-2-(1-METHYLETHYL)-, ACETATE, [1R-(1a,2a,5a)]-

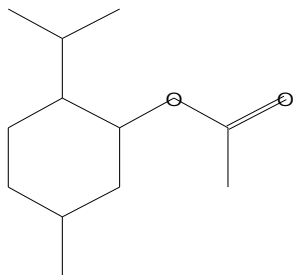

Menthyl acetate

Formula C<sub>12</sub>H<sub>22</sub>O<sub>2</sub>, MW 198, CAS# 89-48-5, Entry# 10354  
Cyclohexanol, 5-methyl-2-(1-methylethyl)-, acetate, (1a,2a,5a)-

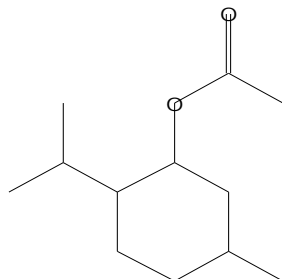

Menthyl acetate

Formula C<sub>12</sub>H<sub>22</sub>O<sub>2</sub>, MW 198, CAS# 89-48-5, Entry# 3027  
Cyclohexanol, 5-methyl-2-(1-methylethyl)-, acetate, (1a,2a,5a)-

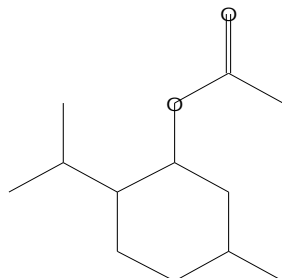

CYCLOHEXANOL, 5-METHYL-2-(1-METHYLETHYL)-, ACETATE  
Formula C<sub>12</sub>H<sub>22</sub>O<sub>2</sub>, MW 198, CAS# 16409-45-3, Entry# 82538  
2-ISOPROPYL-5-METHYLCYCLOHEXYL ACETATE #

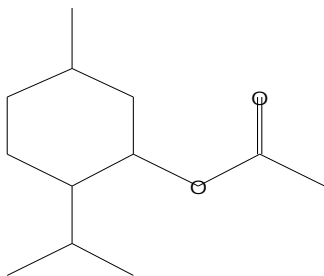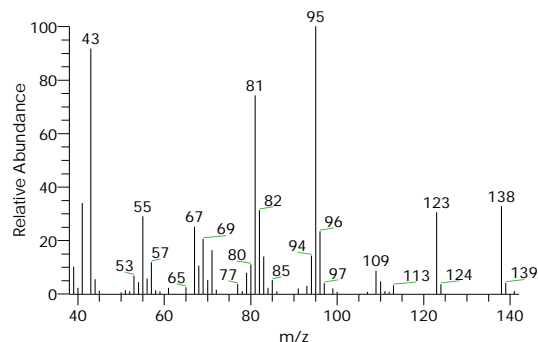

SI 931, RSI 951, mainlib, Entry# 10354, CAS# 89-48-5, Menthyl acetate

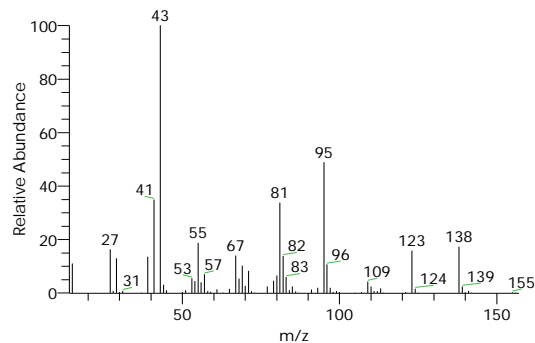

SI 930, RSI 948, replib, Entry# 3027, CAS# 89-48-5, Menthyl acetate

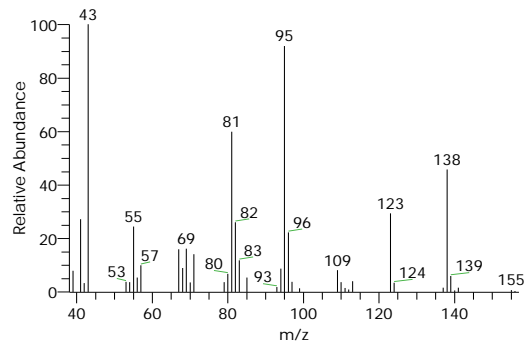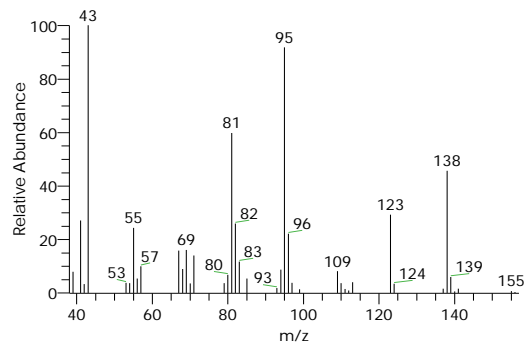

# My GC-MS Report

peppermint\_oil #1241 RT: 8.16 AV: 1 NL: 8.37E6  
T: + c EI Full ms [50.000-750.000]

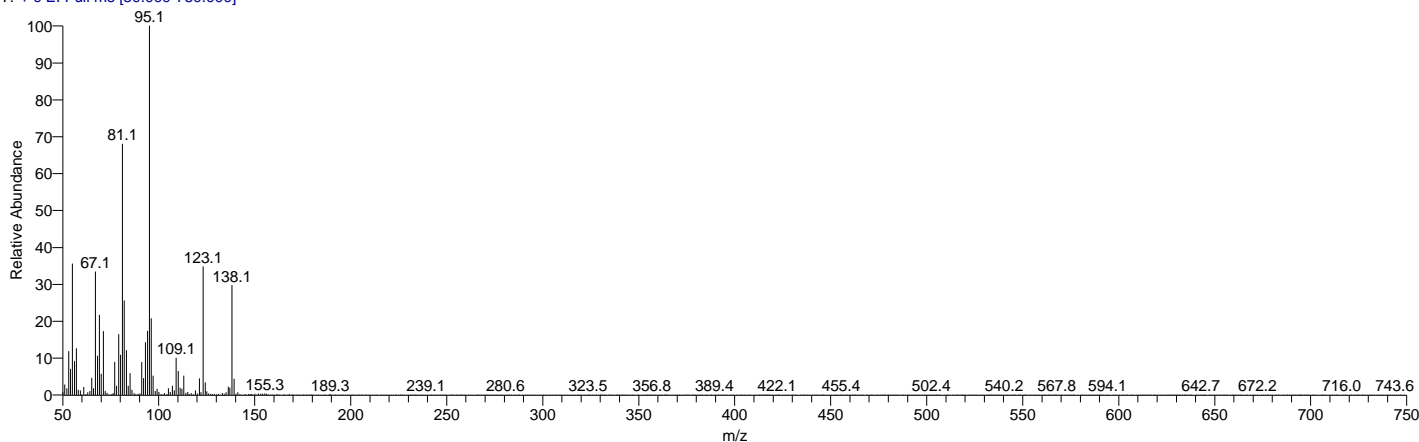

| RT   | Compound Name                                      | Area % | MF  | Molecular Formula | Molecular Weight | Cas #   | Library         |
|------|----------------------------------------------------|--------|-----|-------------------|------------------|---------|-----------------|
| 8.16 | Cyclohexanol, 5-methyl-2-(1-methylethyl)-, acetate | 0.21   | 955 | C12H22O2          | 198              | 16409-4 | replib          |
| 8.16 | CYCLOHEXANOL, 5-METHYL-2-(1-METHYLETHYL)-, ACETATE | 0.21   | 942 | C12H22O2          | 198              | 2623-2  | WileyRegistry8e |
| 8.16 | CYCLOHEXANOL, 5-METHYL-2-(1-METHYLETHYL)-, ACETATE | 0.21   | 916 | C12H22O2          | 198              | 16409-4 | WileyRegistry8e |
| 8.16 | Menthyl acetate                                    | 0.21   | 939 | C12H22O2          | 198              | 89-48-5 | mainlib         |
| 8.16 | CYCLOHEXANOL, 5-METHYL-2-(1-METHYLETHYL)-, ACETATE | 0.21   | 916 | C12H22O2          | 198              | 16409-4 | WileyRegistry8e |

Compound Structure

Hit Spectrum

Cyclohexanol, 5-methyl-2-(1-methylethyl)-, acetate  
Formula C12H22O2, MW 198, CAS# 16409-45-3, Entry# 14465  
Menthyl acetate

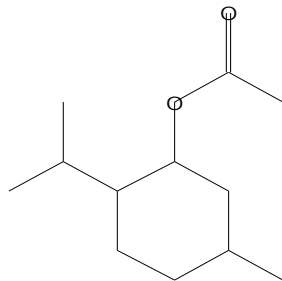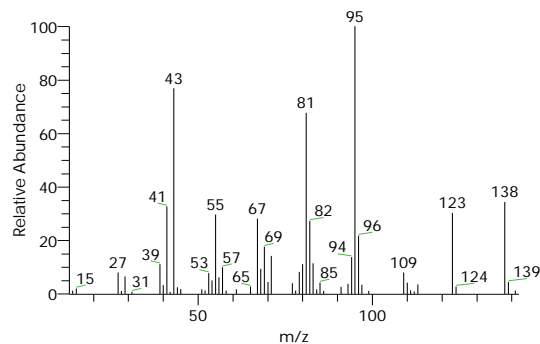

CYCLOHEXANOL, 5-METHYL-2-(1-METHYLETHYL)-, ACETATE  
Formula C12H22O2, MW 198, CAS# 2623-23-6, Entry# 82542  
CYCLOHEXANOL, 5-METHYL-2-(1-METHYLETHYL)-, ACETATE, [1R-(1a,2a,5a)]-

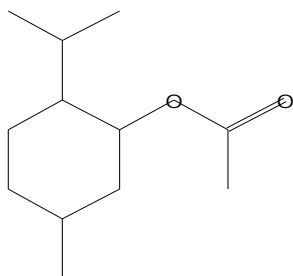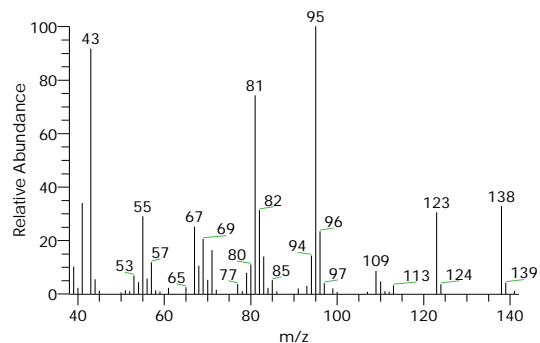

# My GC-MS Report

Compound Structure

Hit Spectrum

CYCLOHEXANOL, 5-METHYL-2-(1-METHYLETHYL)-, ACETATE  
 Formula C<sub>12</sub>H<sub>22</sub>O<sub>2</sub>, MW 198, CAS# 16409-45-3, Entry# 82536  
 2-ISOPROPYL-5-METHYLCYCLOHEXYL ACETATE #

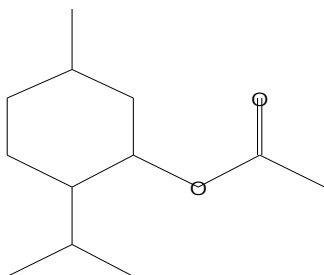

Menthyl acetate

Formula C<sub>12</sub>H<sub>22</sub>O<sub>2</sub>, MW 198, CAS# 89-48-5, Entry# 10354  
 Cyclohexanol, 5-methyl-2-(1-methylethyl)-, acetate, (1à,2à,5à)-



CYCLOHEXANOL, 5-METHYL-2-(1-METHYLETHYL)-, ACETATE  
 Formula C<sub>12</sub>H<sub>22</sub>O<sub>2</sub>, MW 198, CAS# 16409-45-3, Entry# 82534  
 2-ISOPROPYL-5-METHYLCYCLOHEXYL ACETATE #

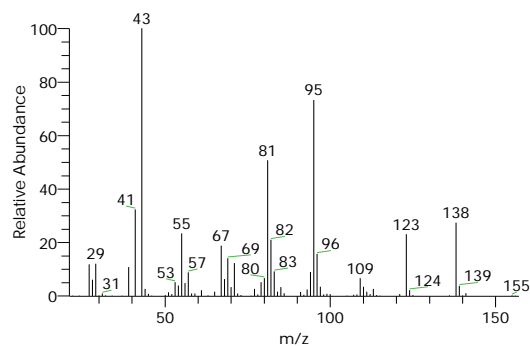

SI 894, RSI 939, mainlib, Entry# 10354, CAS# 89-48-5, Menthyl acetate

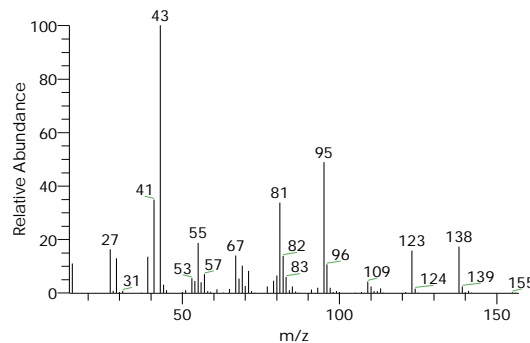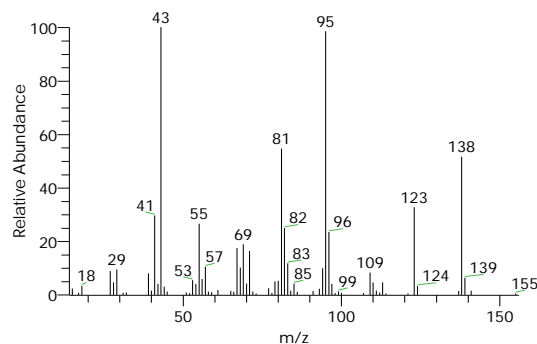

peppermint\_oil #1392 RT: 8.67 AV: 1 NL: 7.27E6  
 T: + c EI Full ms [50.000-750.000]

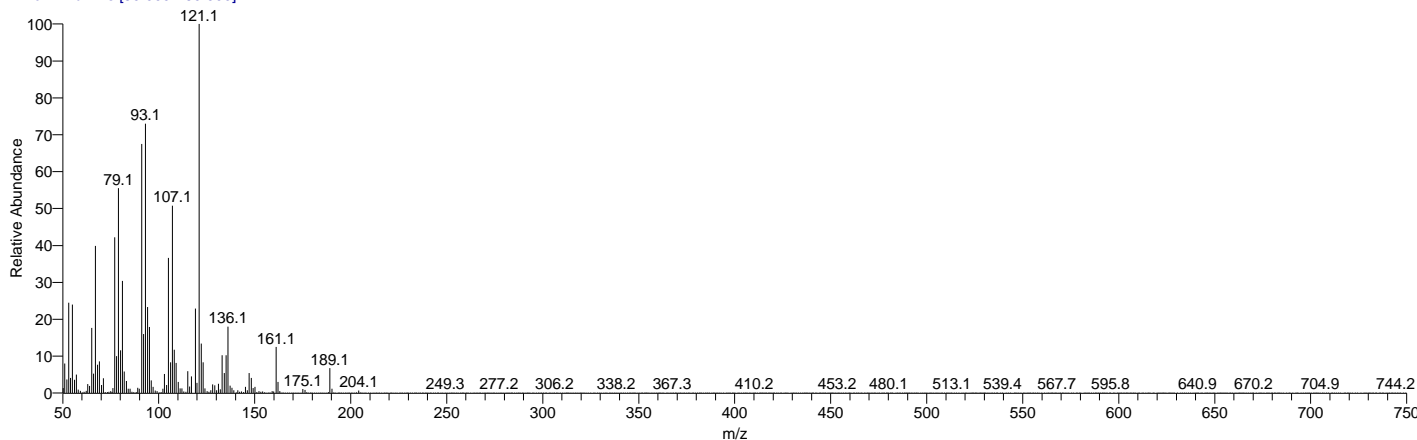

| RT   | Compound Name                                                                   | Area % | MF  | Molecular Formula               | Molecular Weight | Cas #       | Library         |
|------|---------------------------------------------------------------------------------|--------|-----|---------------------------------|------------------|-------------|-----------------|
| 8.67 | BICYCLO[8.1.0]UNDECA-2,6-DIENE, 3,7,11,11-TETRAMETHYL-, (1R*,2Z,6E,10R*)-(+,-)- | 0.46   | 902 | C <sub>15</sub> H <sub>24</sub> | 204              | 100762-46-7 | WileyRegistry8e |
| 8.67 | Elemene isomer                                                                  | 0.46   | 927 | C <sub>15</sub> H <sub>24</sub> | 204              | NA          | mainlib         |



# My GC-MS Report

| RT   | Compound Name                                                                  | Area % | MF  | Molecular Formula | Molecular Weight | Cas #   | Library |
|------|--------------------------------------------------------------------------------|--------|-----|-------------------|------------------|---------|---------|
| 8.67 | ç-Elemene                                                                      | 0.46   | 885 | C15H24            | 204              | 29873-9 | replib  |
| 8.67 | Cyclohexane,<br>1-ethenyl-1-methyl-2-(1-methylethenyl)-4-(1-methylethylidene)- | 0.46   | 901 | C15H24            | 204              | 3242-0  | mainlib |
| 8.67 | ç-Elemene                                                                      | 0.46   | 867 | C15H24            | 204              | 29873-9 | mainlib |

Compound Structure

Hit Spectrum

BICYCLO[8.1.0]UNDECA-2,6-DIENE, 3,7,11,11-TETRAMETHYL-, (1R\*,2Z,6E,10R\*)-(.-.-)-  
 Formula C15H24, MW 204, CAS# 100762-46-7, Entry# 89533  
 (.+.-)-LEPIDOZENE

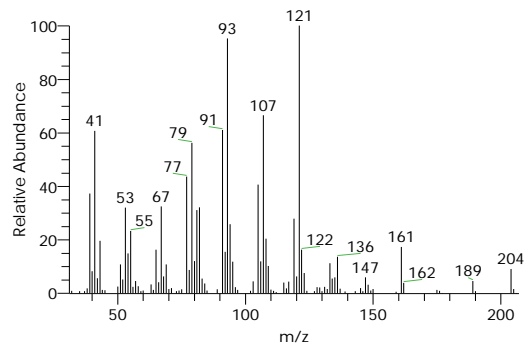

SI 890, RSI 927, mainlib, Entry# 102822, CAS# NA, Elemene isomer

Elemene isomer  
 Formula C15H24, MW 204, CAS# NA, Entry# 102822  
 \$:28BQSLMQNYHVFRDT-UHFFFAOYSA-N

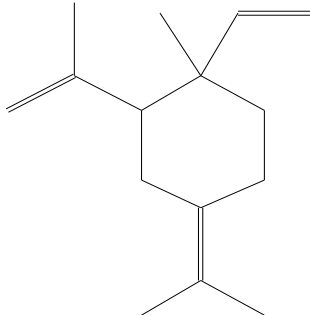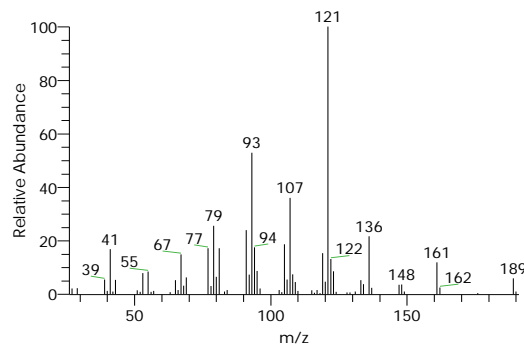

SI 873, RSI 885, replib, Entry# 1378, CAS# 29873-99-2, ç-Elemene

ç-Elemene  
 Formula C15H24, MW 204, CAS# 29873-99-2, Entry# 1378  
 1-Methyl-2-(1-methylethenyl)-4-(1-methylethylidene)-1-vinylcyclohexane, (1R-trans)-

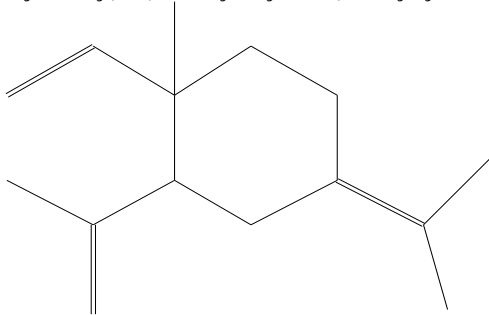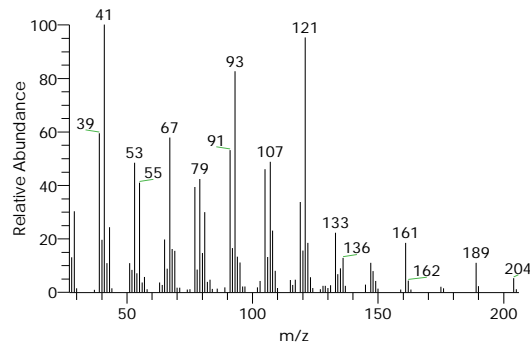

Cyclohexane, 1-ethenyl-1-methyl-2-(1-methylethenyl)-4-(1-methylethylidene)-  
 Formula C15H24, MW 204, CAS# 3242-08-8, Entry# 102823  
 o-Menth-8-ene, 4-isopropylidene-1-vinyl-

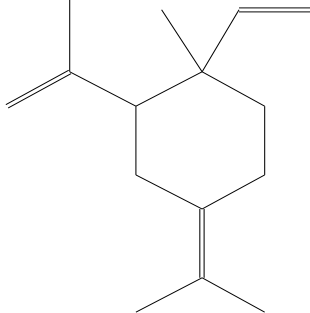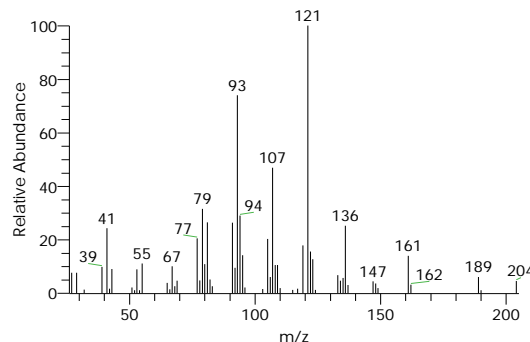

# My GC-MS Report

Compound Structure

Hit Spectrum

ç-Elemene

Formula C<sub>15</sub>H<sub>24</sub>, MW 204, CAS# 29873-99-2, Entry# 102784

1-Methyl-2-(1-methylethenyl)-4-(1-methylethylidene)-1-vinylcyclohexane, (1R-trans)-

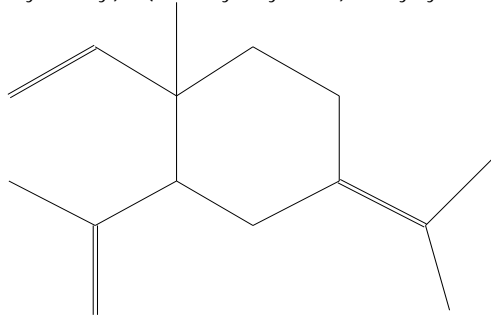

SI 859, RSI 867, mainlib, Entry# 102784, CAS# 29873-99-2, ç-Elemene

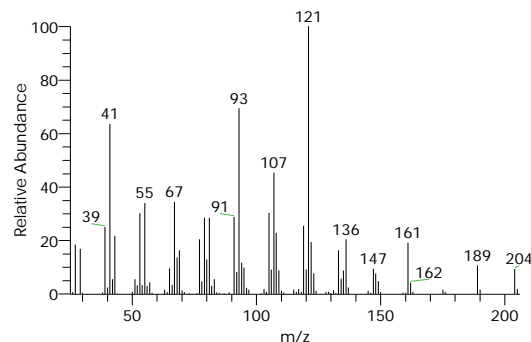

peppermint\_oil #1710 RT: 9.73 AV: 1 NL: 1.19E7  
T: + c EI Full ms [50.000-750.000]

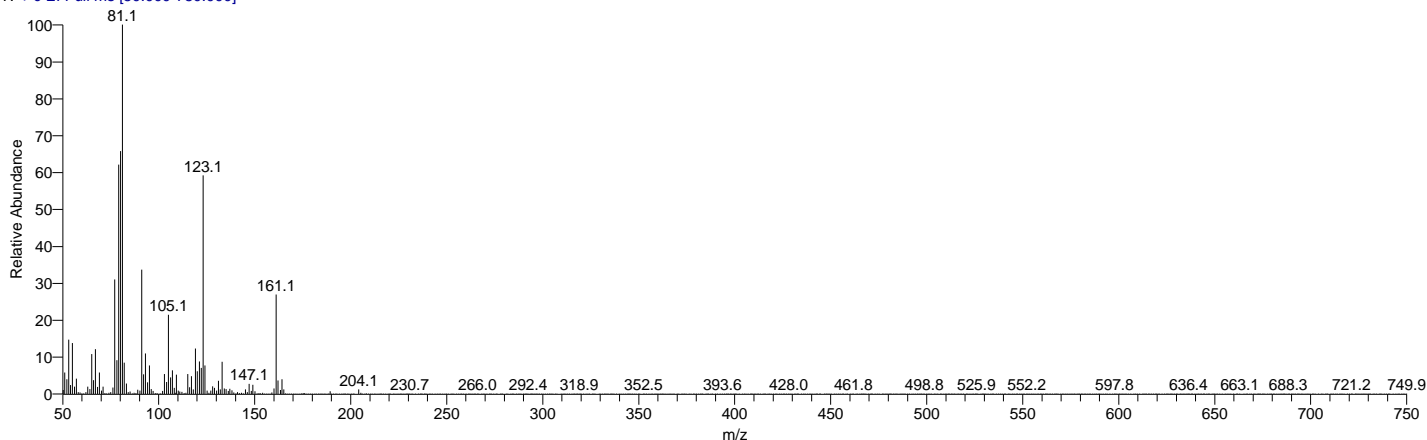

| RT   | Compound Name                                                                                                                  | Area % | MF  | Molecular Formula               | Molecular Weight | Cas #         | Library             |
|------|--------------------------------------------------------------------------------------------------------------------------------|--------|-----|---------------------------------|------------------|---------------|---------------------|
| 9.73 | CYCLOBUTA[1,2:3,4]DICYCLOP<br>ENTENE,<br>1,2,3,3A,3Bá,4,5,6,6Aá,6Bà-DECA<br>HYDRO-1à-ISOPRO<br>PYL-3Aà-METHYL-6-METHYLEN<br>E- | 0.58   | 931 | C <sub>15</sub> H <sub>24</sub> | 204              | 5208-5<br>9-3 | WileyRegi<br>stry8e |
| 9.73 | (-)-á-Bourbonene                                                                                                               | 0.58   | 896 | C <sub>15</sub> H <sub>24</sub> | 204              | 5208-5<br>9-3 | replib              |
| 9.73 | CYCLOBUTA[1,2:3,4]DICYCLOP<br>ENTENE,<br>1,2,3,3A,3Bá,4,5,6,6Aá,6Bà-DECA<br>HYDRO-1à-ISOPRO<br>PYL-3Aà-METHYL-6-METHYLEN<br>E- | 0.58   | 874 | C <sub>15</sub> H <sub>24</sub> | 204              | 5208-5<br>9-3 | WileyRegi<br>stry8e |
| 9.73 | (-)-á-Bourbonene                                                                                                               | 0.58   | 873 | C <sub>15</sub> H <sub>24</sub> | 204              | 5208-5<br>9-3 | mainlib             |
| 9.73 | CYCLOBUTA[1,2:3,4]DICYCLOP<br>ENTENE,<br>1,2,3,3A,3Bá,4,5,6,6Aá,6Bà-DECA<br>HYDRO-1à-ISOPRO<br>PYL-3Aà-METHYL-6-METHYLEN<br>E- | 0.58   | 898 | C <sub>15</sub> H <sub>24</sub> | 204              | 5208-5<br>9-3 | WileyRegi<br>stry8e |

# My GC-MS Report

Compound Structure

Hit Spectrum

Formula C<sub>15</sub>H<sub>24</sub>, MW 204, CAS# 5208-59-3, Entry# 89559

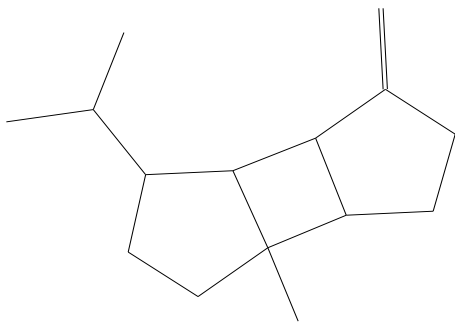

(-)- $\alpha$ -Bourbonene

Formula C<sub>15</sub>H<sub>24</sub>, MW 204, CAS# 5208-59-3, Entry# 11633

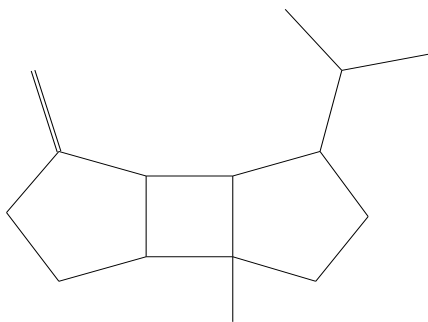

(-)- $\alpha$ -Bourbonene

Formula C<sub>15</sub>H<sub>24</sub>, MW 204, CAS# 5208-59-3, Entry# 50341

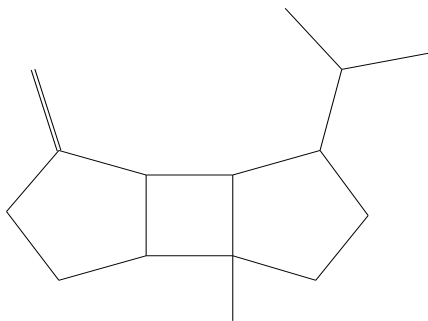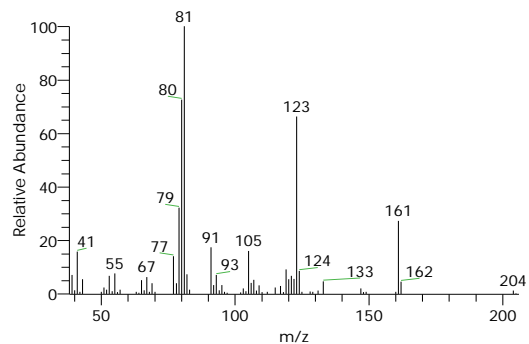

SI 885, RSI 896, replib, Entry# 11633, CAS# 5208-59-3, (-)- $\alpha$ -Bourbonene

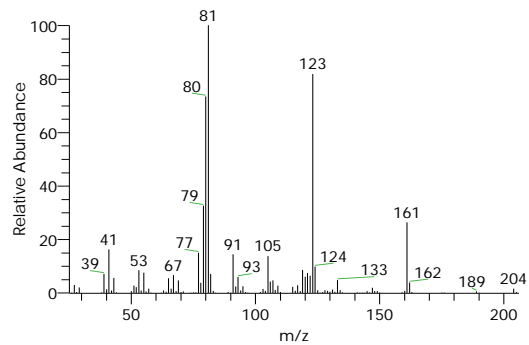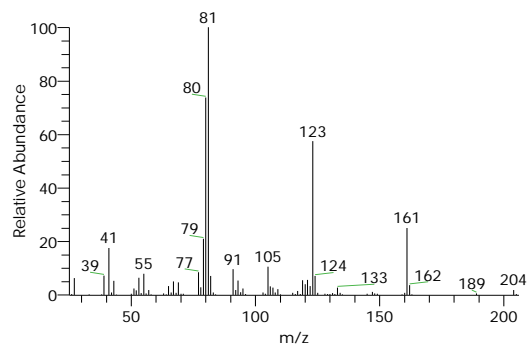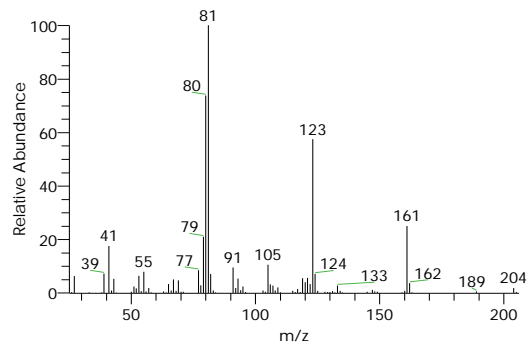

# My GC-MS Report

Compound Structure

Hit Spectrum

Formula C15H24, MW 204, CAS# 5208-59-3, Entry# 89479

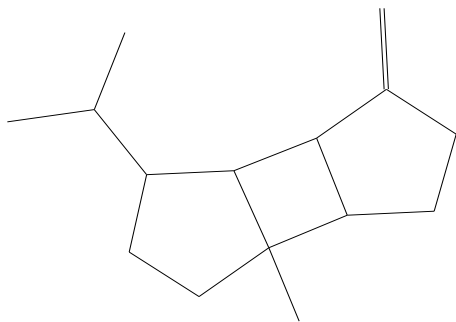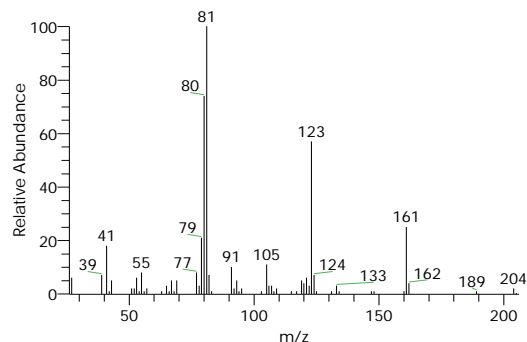

peppermint\_oil #1974 RT: 10.62 AV: 1 NL: 1.11E8  
T: + c EI Full ms [50.000-750.000]

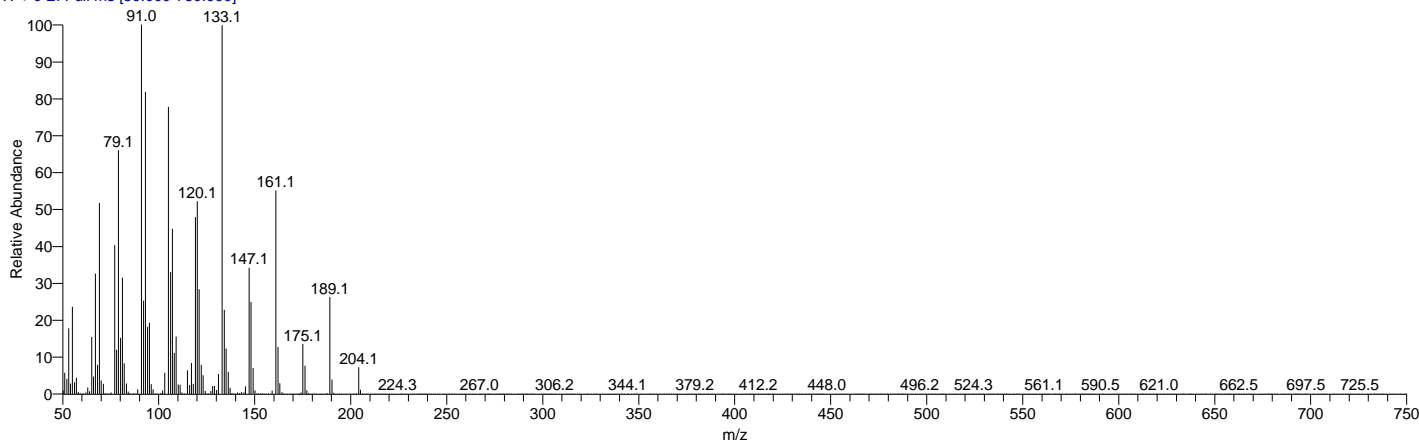

| RT    | Compound Name                                                                 | Area % | MF  | Molecular Formula | Molecular Weight | Cas #   | Library         |
|-------|-------------------------------------------------------------------------------|--------|-----|-------------------|------------------|---------|-----------------|
| 10.62 | Caryophyllene                                                                 | 18.48  | 941 | C15H24            | 204              | 87-44-5 | mainlib         |
| 10.62 | BICYCLO[7.2.0]UNDEC-4-ENE, 4,11,11-TRIMETHYL-8-METHYLENE-, [1R-(1R*,4E,9S*)]- | 18.48  | 941 | C15H24            | 204              | 87-44-5 | WileyRegistry8e |
| 10.62 | BICYCLO[7.2.0]UNDEC-4-ENE, 4,11,11-TRIMETHYL-8-METHYLENE-, [1R-(1R*,4E,9S*)]- | 18.48  | 932 | C15H24            | 204              | 87-44-5 | WileyRegistry8e |
| 10.62 | TRANS(Δ)-CARYOPHYLLENE                                                        | 18.48  | 924 | C15H24            | 204              | NA      | WileyRegistry8e |
| 10.62 | Isocaryophyllene                                                              | 18.48  | 918 | C15H24            | 204              | NA      | mainlib         |

Compound Structure

Hit Spectrum

Caryophyllene

Formula C15H24, MW 204, CAS# 87-44-5, Entry# 66572

Bicyclo[7.2.0]undec-4-ene, 4,11,11-trimethyl-8-methylene-, [1R-(1R\*,4E,9S\*)]-

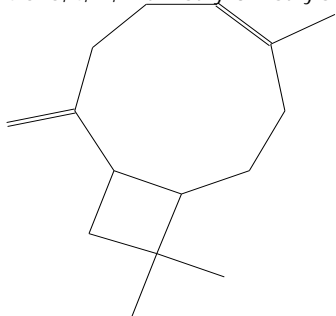

SI 941, RSI 941, mainlib, Entry# 66572, CAS# 87-44-5, Caryophyllene

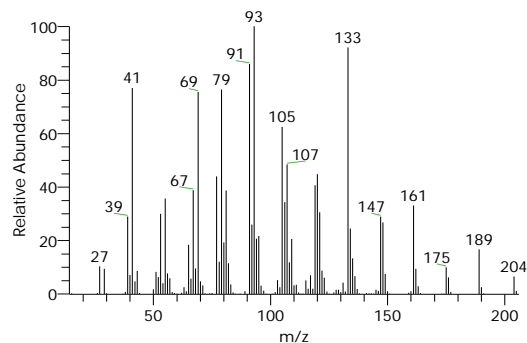

# My GC-MS Report

Compound Structure

Hit Spectrum

BICYCLO[7.2.0]UNDEC-4-ENE, 4,11,11-TRIMETHYL-8-METHYLENE-, [1R-(1R\*,4E,9S\*)]-  
Formula C<sub>15</sub>H<sub>24</sub>, MW 204, CAS# 87-44-5, Entry# 89162  
2,6,10,10-TETRAMETHYLBICYCLO[7.2.0]UNDECA-1,6-DIENE #

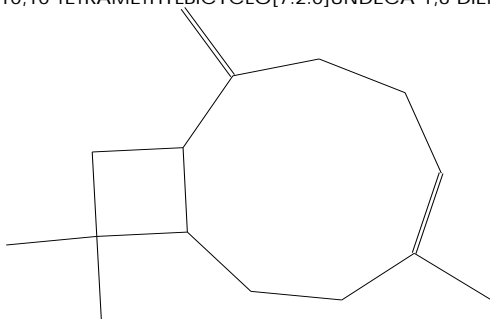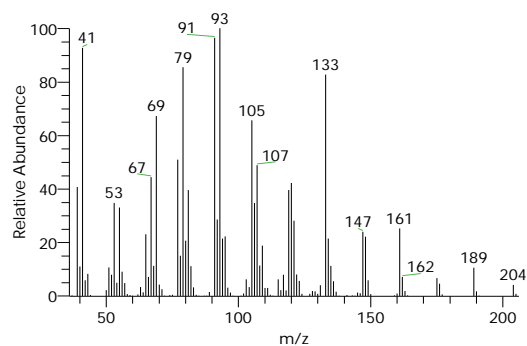

BICYCLO[7.2.0]UNDEC-4-ENE, 4,11,11-TRIMETHYL-8-METHYLENE-, [1R-(1R\*,4E,9S\*)]-  
Formula C<sub>15</sub>H<sub>24</sub>, MW 204, CAS# 87-44-5, Entry# 89170  
2,6,10,10-TETRAMETHYLBICYCLO[7.2.0]UNDECA-1,6-DIENE #

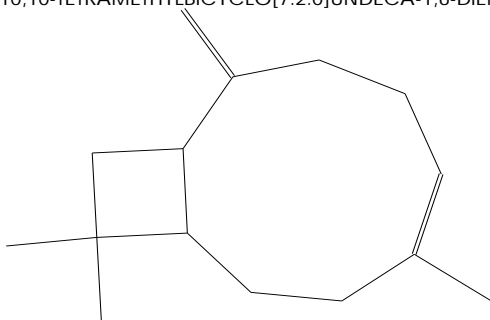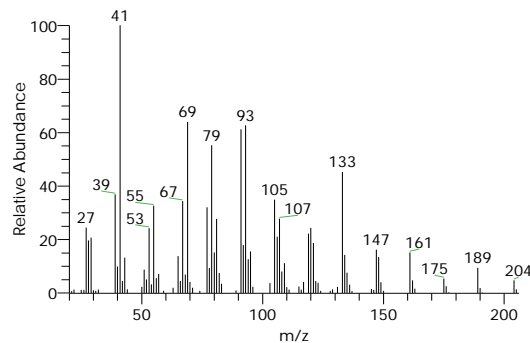

TRANS( $\alpha$ )-CARYOPHYLLENE  
Formula C<sub>15</sub>H<sub>24</sub>, MW 204, CAS# NA, Entry# 89641

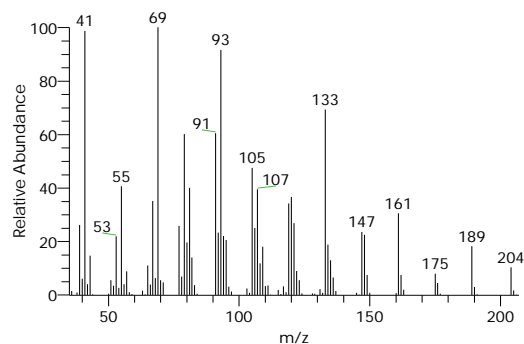

Isocaryophyllene  
Formula C<sub>15</sub>H<sub>24</sub>, MW 204, CAS# NA, Entry# 65988  
4,11,11-Trimethyl-8-methylenebicyclo[7.2.0]undec-4-ene #

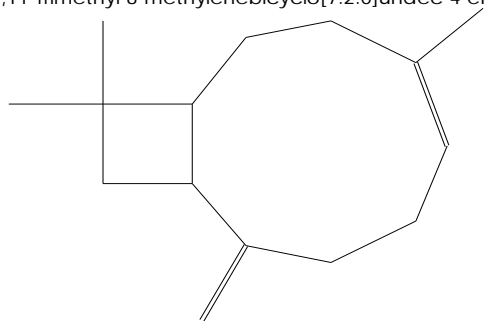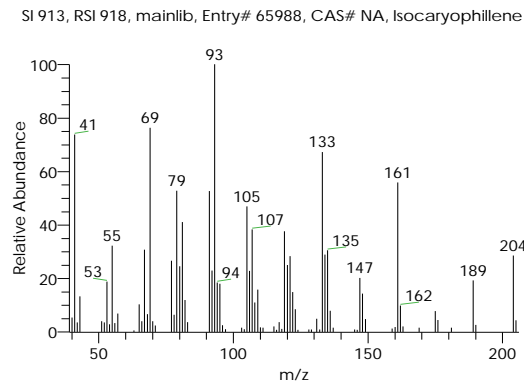

SI 913, RSI 918, mainlib, Entry# 65988, CAS# NA, Isocaryophyllene

# My GC-MS Report

peppermint\_oil #2185 RT: 11.32 AV: 1 NL: 2.80E7  
T: + c EI Full ms [50.000-750.000]

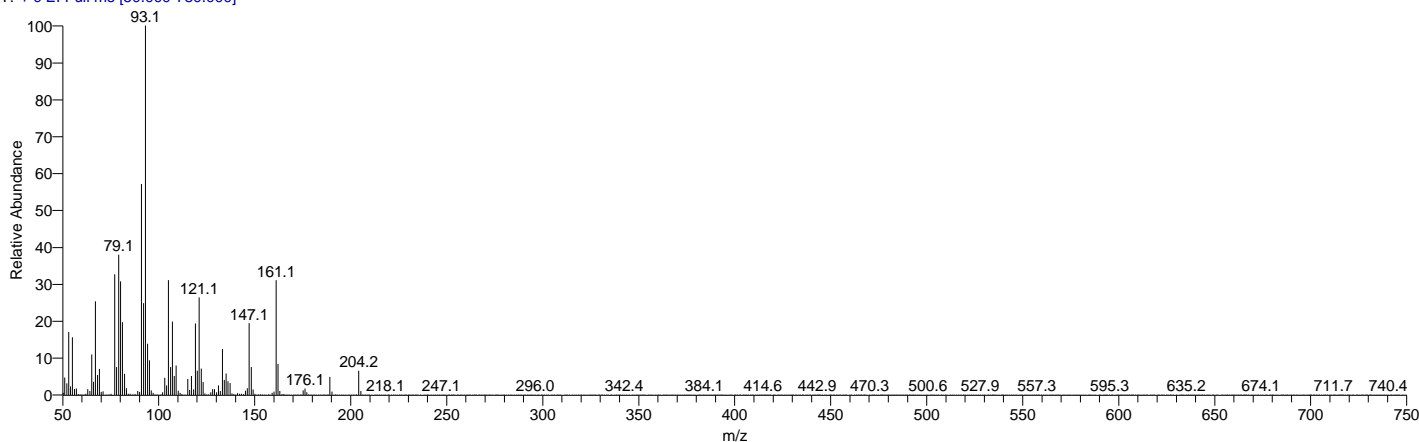

| RT    | Compound Name                                                                                 | Area % | MF  | Molecular Formula               | Molecular Weight | Cas #      | Library         |
|-------|-----------------------------------------------------------------------------------------------|--------|-----|---------------------------------|------------------|------------|-----------------|
| 11.32 | Humulene                                                                                      | 1.41   | 887 | C <sub>15</sub> H <sub>24</sub> | 204              | 6753-98-6  | replib          |
| 11.32 | cis-à-Bisabolene                                                                              | 1.41   | 878 | C <sub>15</sub> H <sub>24</sub> | 204              | 29837-07-8 | mainlib         |
| 11.32 | 1,4,8-CYCLOUNDECATRIENE, 2,6,6,9-TETRAMETHYL-, (E,E,E)-                                       | 1.41   | 864 | C <sub>15</sub> H <sub>24</sub> | 204              | 6753-98-6  | WileyRegistry8e |
| 11.32 | NAPHTHALENE, 1,2,3,5,6,7,8,8A-OCTAHYDRO-1,8A-DIMETHYL-7-(1-METHYLETHENYL)-, [1R-(1à,7á,8Aà)]- | 1.41   | 862 | C <sub>15</sub> H <sub>24</sub> | 204              | 4630-07-3  | WileyRegistry8e |
| 11.32 | CYCLOHEXENE, 4-(1,5-DIMETHYL-1,4-HEXADIENYL)-1-METHYL-                                        | 1.41   | 878 | C <sub>15</sub> H <sub>24</sub> | 204              | 17627-44-0 | WileyRegistry8e |

## Compound Structure

## Hit Spectrum

Humulene  
Formula C<sub>15</sub>H<sub>24</sub>, MW 204, CAS# 6753-98-6, Entry# 14003  
à-Caryophyllene

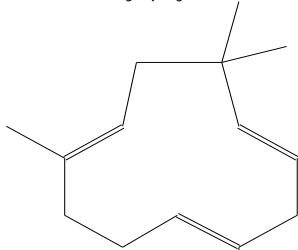

SI 868, RSI 887, replib, Entry# 14003, CAS# 6753-98-6, Humulene

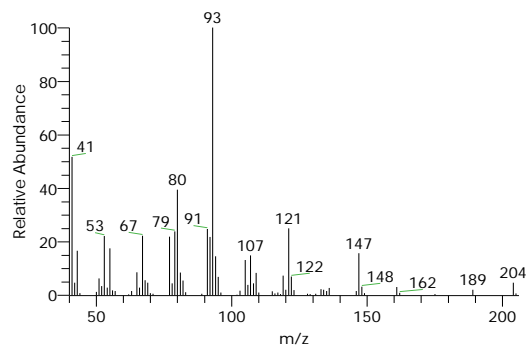

cis-à-Bisabolene  
Formula C<sub>15</sub>H<sub>24</sub>, MW 204, CAS# 29837-07-8, Entry# 65792  
4-[(1Z)-1,5-Dimethyl-1,4-hexadienyl]-1-methyl-1-cyclohexene

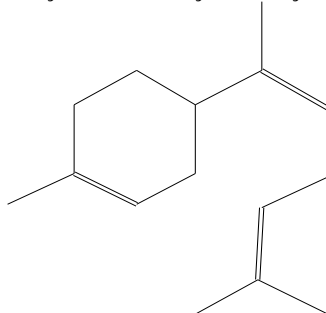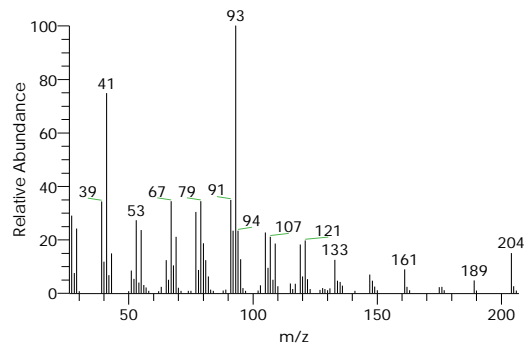

# My GC-MS Report

Compound Structure

Hit Spectrum

1,4,8-CYCLOUNDECATRIENE, 2,6,6,9-TETRAMETHYL-, (E,E,E)-  
Formula C<sub>15</sub>H<sub>24</sub>, MW 204, CAS# 6753-98-6, Entry# 89111  
2,6,6,9-TETRAMETHYL-1,4,8-CYCLOUNDECATRIENE #

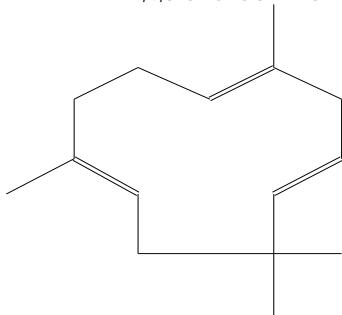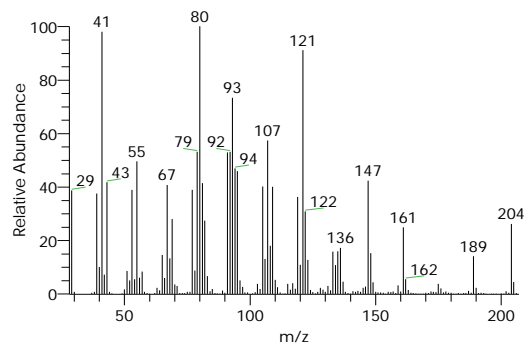

Formula C<sub>15</sub>H<sub>24</sub>, MW 204, CAS# 4630-07-3, Entry# 89318  
3-ISOPROPENYL-4A,5-DIMETHYL-1,2,3,4,4A,5,6,7-OCTAHYDRONAPHTHALENE #

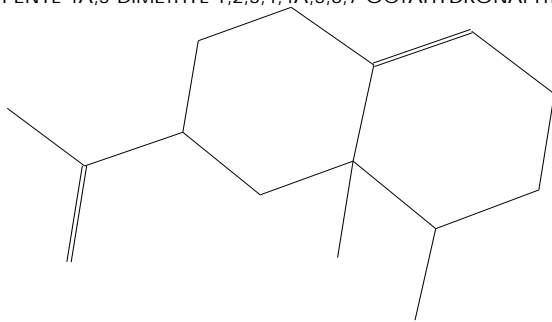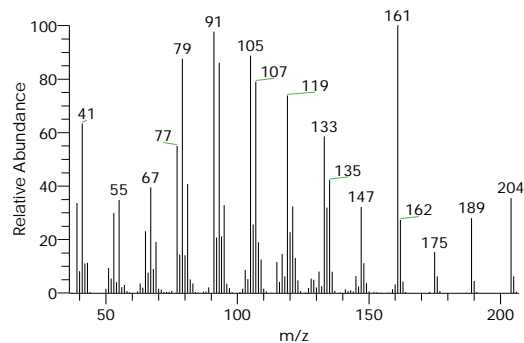

CYCLOHEXENE, 4-(1,5-DIMETHYL-1,4-HEXADIENYL)-1-METHYL-  
Formula C<sub>15</sub>H<sub>24</sub>, MW 204, CAS# 17627-44-0, Entry# 89572  
4-[(1E)-1,5-DIMETHYL-1,4-HEXADIENYL]-1-METHYL-1-CYCLOHEXENE #

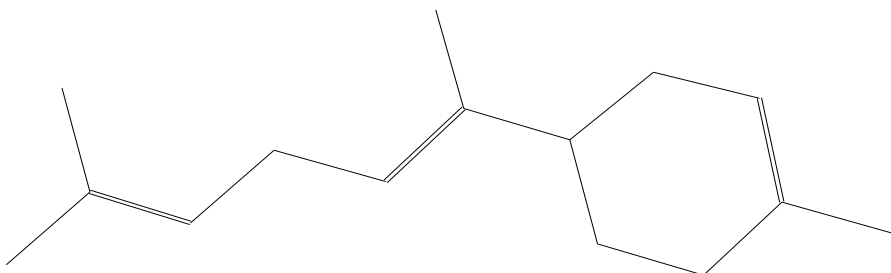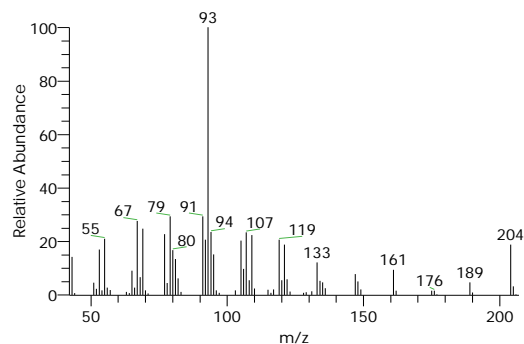

peppermint\_oil #2378 RT: 11.97 AV: 1 NL: 1.35E7  
T: + c EI Full ms [50.000-750.000]

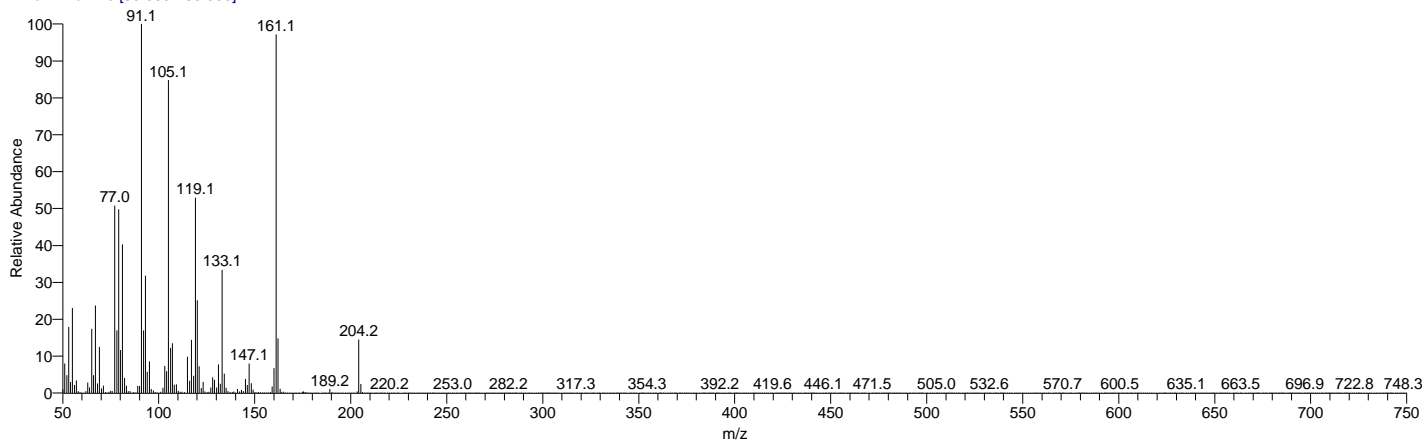

| RT    | Compound Name                                                             | Area % | MF  | Molecular Formula               | Molecular Weight | Cas #          | Library             |
|-------|---------------------------------------------------------------------------|--------|-----|---------------------------------|------------------|----------------|---------------------|
| 11.97 | 1,6-CYCLODECA-DIENE,<br>1-METHYL-5-METHYLENE-8-(1-METHYLETHYL)-, [(E,E)]- | 0.88   | 951 | C <sub>15</sub> H <sub>24</sub> | 204              | 23986-7<br>4-5 | WileyRegi<br>stry8e |

# My GC-MS Report

| RT    | Compound Name                                                              | Area % | MF  | Molecular Formula | Molecular Weight | Cas #          | Library             |
|-------|----------------------------------------------------------------------------|--------|-----|-------------------|------------------|----------------|---------------------|
| 11.97 | 1,6-CYCLODECADIENE,<br>1-METHYL-5-METHYLENE-8-(1-METHYLETHYL)-, [S-(E,E)]- | 0.88   | 934 | C15H24            | 204              | 23986-7<br>4-5 | WileyRegi<br>stry8e |
| 11.97 | Germacrene D                                                               | 0.88   | 939 | C15H24            | 204              | 23986-7<br>4-5 | replib              |
| 11.97 | Germacrene D                                                               | 0.88   | 954 | C15H24            | 204              | 23986-7<br>4-5 | mainlib             |
| 11.97 | 1,6-CYCLODECADIENE,<br>1-METHYL-5-METHYLENE-8-(1-METHYLETHYL)-, [S-(E,E)]- | 0.88   | 951 | C15H24            | 204              | 23986-7<br>4-5 | WileyRegi<br>stry8e |

## Compound Structure

## Hit Spectrum

1,6-CYCLODECADIENE, 1-METHYL-5-METHYLENE-8-(1-METHYLETHYL)-, [S-(E,E)]-  
Formula C15H24, MW 204, CAS# 23986-74-5, Entry# 89578  
GERMACRA-1(10),4(15),5-TRIENE, (-)-

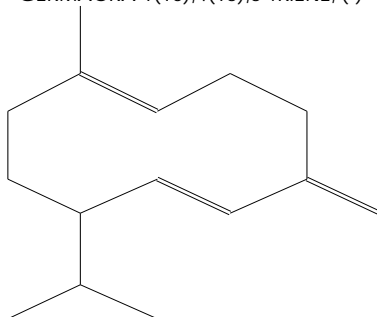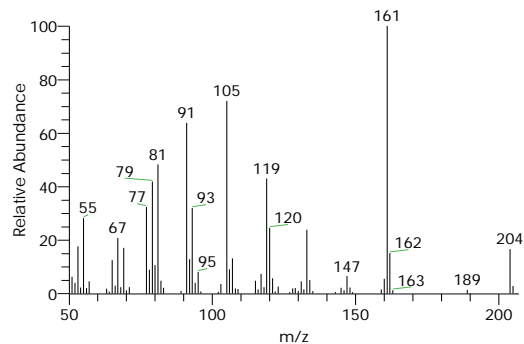

1,6-CYCLODECADIENE, 1-METHYL-5-METHYLENE-8-(1-METHYLETHYL)-, [S-(E,E)]-  
Formula C15H24, MW 204, CAS# 23986-74-5, Entry# 89560  
GERMACRA-1(10),4(15),5-TRIENE, (-)-

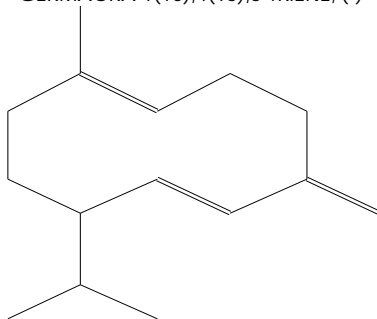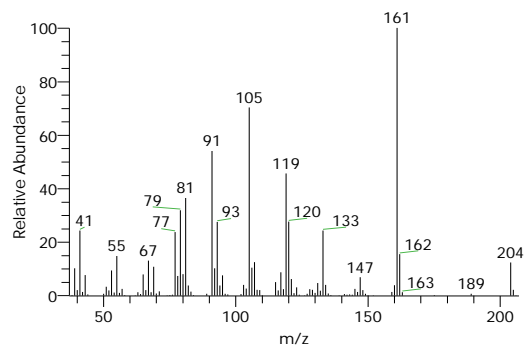

Germacrene D  
Formula C15H24, MW 204, CAS# 23986-74-5, Entry# 24886  
(S,1Z,6Z)-8-isopropyl-1-methyl-5-methylenecyclodeca-1,6-diene

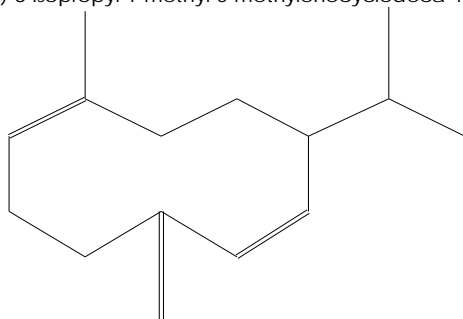

SI 921, RSI 939, replib, Entry# 24886, CAS# 23986-74-5, Germacrene D

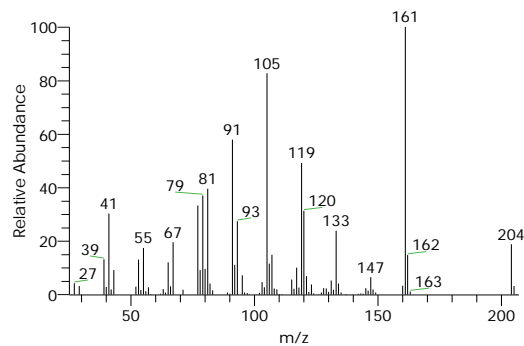



# My GC-MS Report

Compound Structure

Hit Spectrum

## Germacrene D

Formula C<sub>15</sub>H<sub>24</sub>, MW 204, CAS# 23986-74-5, Entry# 150487  
(S,1Z,6Z)-8-Isopropyl-1-methyl-5-methylenecyclodeca-1,6-diene

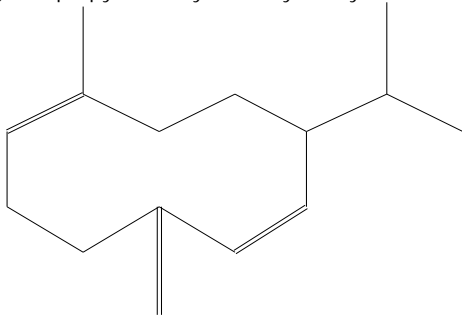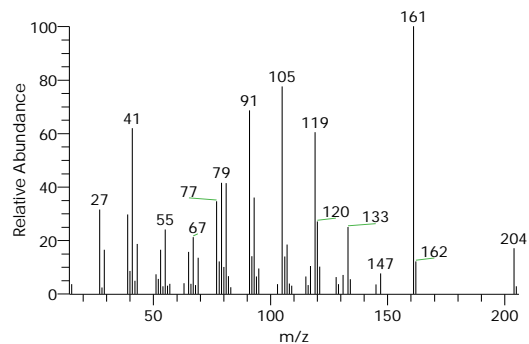

1,6-CYCLODECADIENE, 1-METHYL-5-METHYLENE-8-(1-METHYLETHYL)-, [S-(E,E)]-  
Formula C<sub>15</sub>H<sub>24</sub>, MW 204, CAS# 23986-74-5, Entry# 362375  
GERMACRA-1(10),4(15),5-TRIENE, (-)-

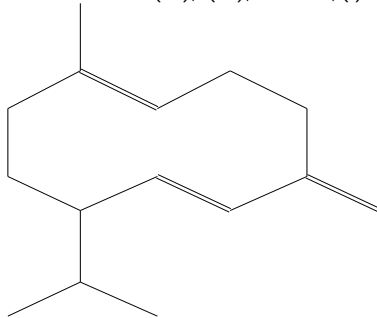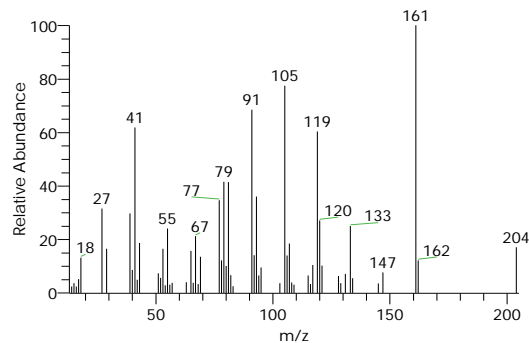

peppermint\_oil #2484 RT: 12.33 AV: 1 NL: 4.05E6  
T: + c EI Full ms [50.000-750.000]

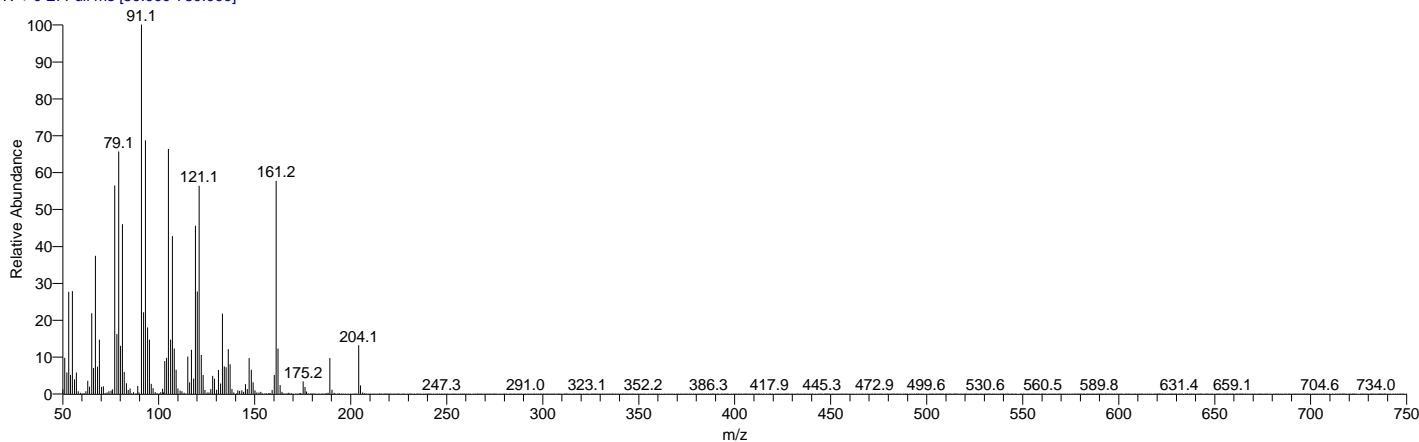

| RT    | Compound Name                                                                                | Area % | MF  | Molecular Formula               | Molecular Weight | Cas #       | Library         |
|-------|----------------------------------------------------------------------------------------------|--------|-----|---------------------------------|------------------|-------------|-----------------|
| 12.33 | (S,1Z,6Z)-8-Isopropyl-1-methyl-5-methylenecyclodeca-1,6-diene                                | 0.34   | 905 | C <sub>15</sub> H <sub>24</sub> | 204              | 317819-80-0 | mainlib         |
| 12.33 | Alloaromadendrene                                                                            | 0.34   | 914 | C <sub>15</sub> H <sub>24</sub> | 204              | 25246-27-9  | replib          |
| 12.33 | á-Longipinene                                                                                | 0.34   | 884 | C <sub>15</sub> H <sub>24</sub> | 204              | 41432-70-6  | mainlib         |
| 12.33 | NAPHTHALENE, 1,2,4A,5,6,8A-HEXAHYDRO-4,7-DIMETHYL-1-(1-METHYLETHYL)-, (1à,4Aà,8Aà)-ç-Elemene | 0.34   | 885 | C <sub>15</sub> H <sub>24</sub> | 204              | 31983-22-9  | WileyRegistry8e |
| 12.33 | ç-Elemene                                                                                    | 0.34   | 895 | C <sub>15</sub> H <sub>24</sub> | 204              | 29873-99-2  | replib          |

# My GC-MS Report

Compound Structure

Hit Spectrum

(S,1Z,6Z)-8-Isopropyl-1-methyl-5-methylenecyclodeca-1,6-diene  
Formula C<sub>15</sub>H<sub>24</sub>, MW 204, CAS# 317819-80-0, Entry# 150394  
1,6-Cyclodecadiene, 1-methyl-5-methylene-8-(1-methylethyl)-, (1Z,6Z,8S)-

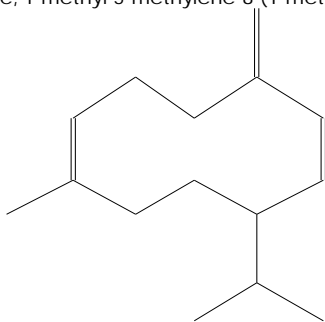

Alloaromadendrene

Formula C<sub>15</sub>H<sub>24</sub>, MW 204, CAS# 25246-27-9, Entry# 1320

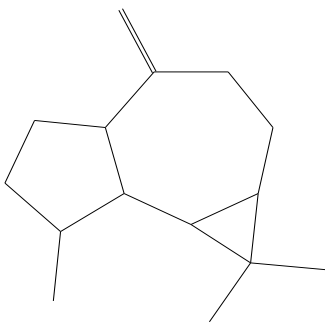

α-Longipinene

Formula C<sub>15</sub>H<sub>24</sub>, MW 204, CAS# 41432-70-6, Entry# 60945  
(1S,2R,7S,8S)-2,6,6-Trimethyl-9-methylenetricyclo[5.4.0.0<sup>2,8</sup>]undecane

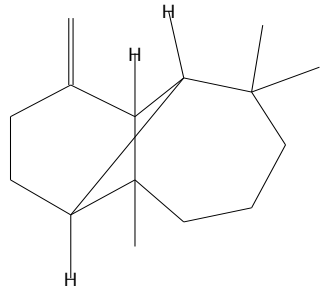

NAPHTHALENE, 1,2,4A,5,6,8A-HEXAHYDRO-4,7-DIMETHYL-1-(1-METHYLETHYL)-, (1à,4Aà,8Aà)-  
Formula C<sub>15</sub>H<sub>24</sub>, MW 204, CAS# 31983-22-9, Entry# 89349  
NAPHTHALENE, 1,2,4Aà,5,6,8Aà-HEXAHYDRO-1à-ISOPROPYL-4,7-DIMETHYL-

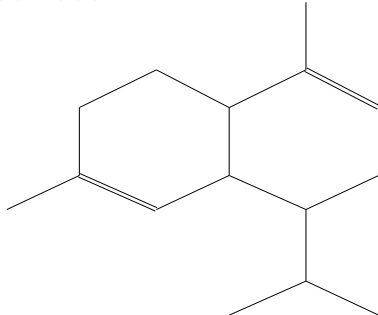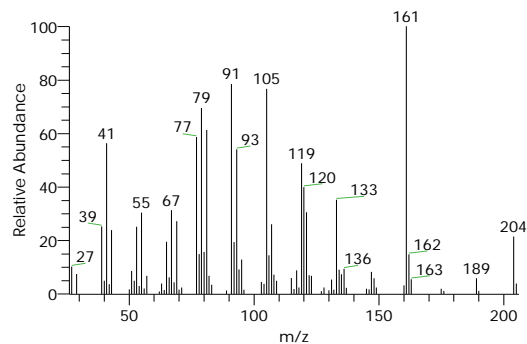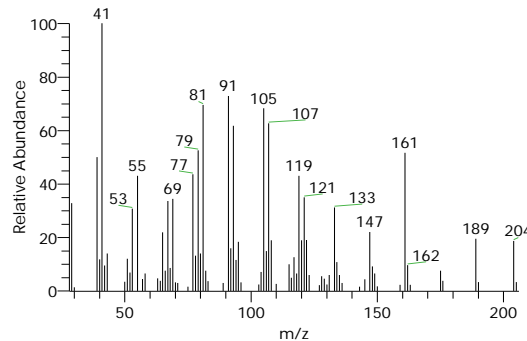

SI 875, RSI 884, mainlib, Entry# 60945, CAS# 41432-70-6, α-Longipinene

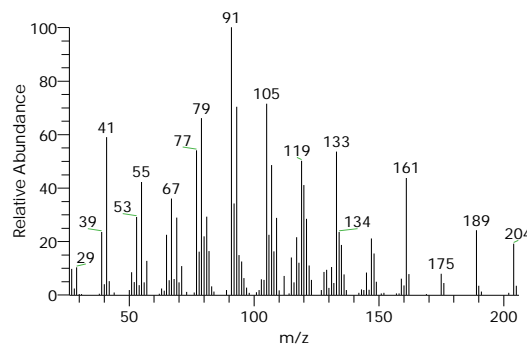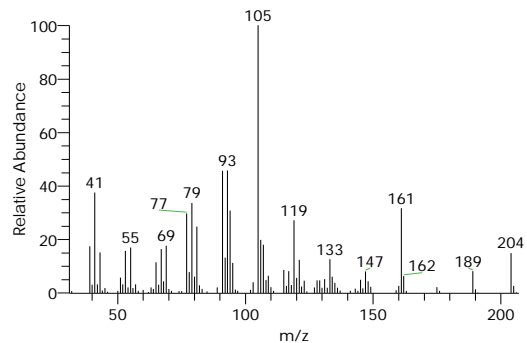

# My GC-MS Report

Compound Structure

Hit Spectrum

ç-Elemene

Formula C<sub>15</sub>H<sub>24</sub>, MW 204, CAS# 29873-99-2, Entry# 1378

1-Methyl-2-(1-methylethenyl)-4-(1-methylethylidene)-1-vinylcyclohexane, (1R-trans)-

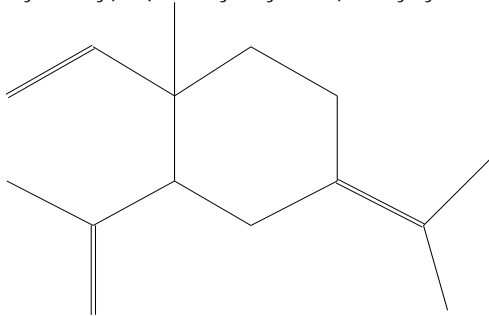

SI 873, RSI 895, replib, Entry# 1378, CAS# 29873-99-2, ç-Elemene

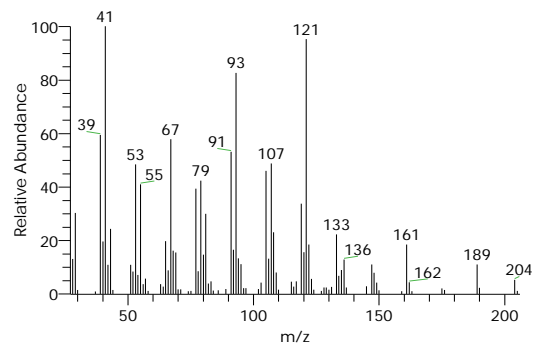

Supplement: mmc2.pdf [file mmc2.pdf]
