# Supplementary material for: Larvicidal and adulticidal activity of essential oils from plants of the Lamiaceae family against the West Nile virus vector, Culex pipiens (Diptera: Culicidae)
Source: PubMed Central journal article supplement (PMC9232543; doi:10.1016/j.sjbs.2022.103350), 2022-06-16

# My GC-MS Report

RT: 0.00 - 37.12 SM: 15B

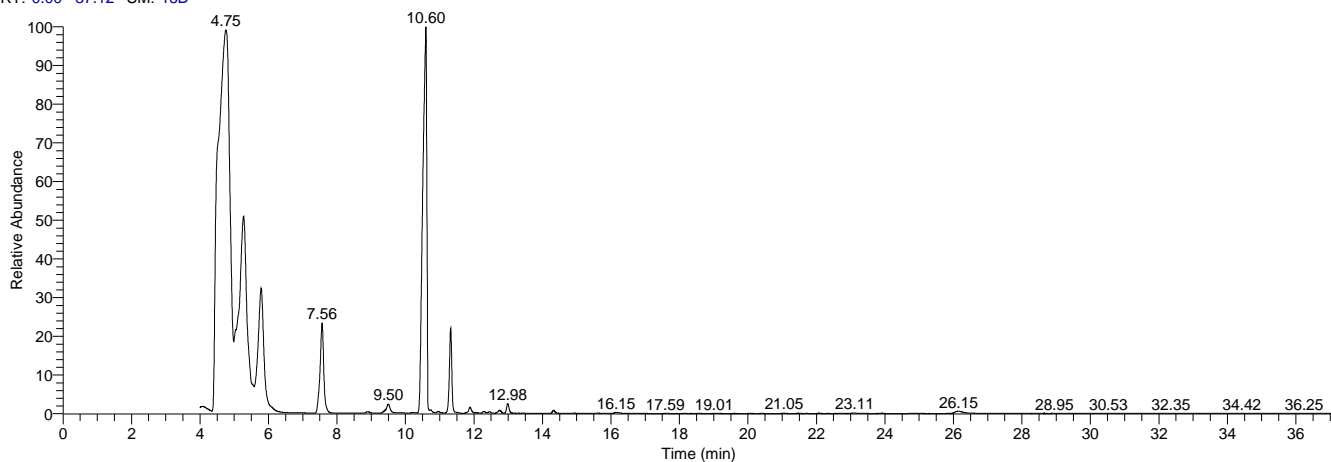

NL:  
1.47E9  
TIC MS  
Rosemary\_  
Oil

| RT    | Area % | Peak Area      | Peak Height   |
|-------|--------|----------------|---------------|
| 4.74  | 56.43  | 25013820264.90 | 1129121917.45 |
| 5.02  | 0.12   | 55129962.68    | 21722588.01   |
| 5.27  | 7.16   | 3173657422.95  | 395266522.26  |
| 5.79  | 5.40   | 2395131674.20  | 321059292.84  |
| 7.57  | 3.69   | 1637296673.38  | 301132213.64  |
| 9.50  | 0.34   | 149689467.29   | 27714656.04   |
| 10.60 | 23.00  | 10192565723.37 | 1411154462.06 |
| 11.32 | 3.20   | 1418669492.20  | 344647332.02  |
| 11.88 | 0.26   | 115987575.21   | 23356318.14   |
| 12.98 | 0.39   | 171609677.11   | 39798533.75   |

Rosemary\_Oil #221 RT: 4.74 AV: 1 NL: 2.67E8  
T: + c EI Full ms [50.000-750.000]

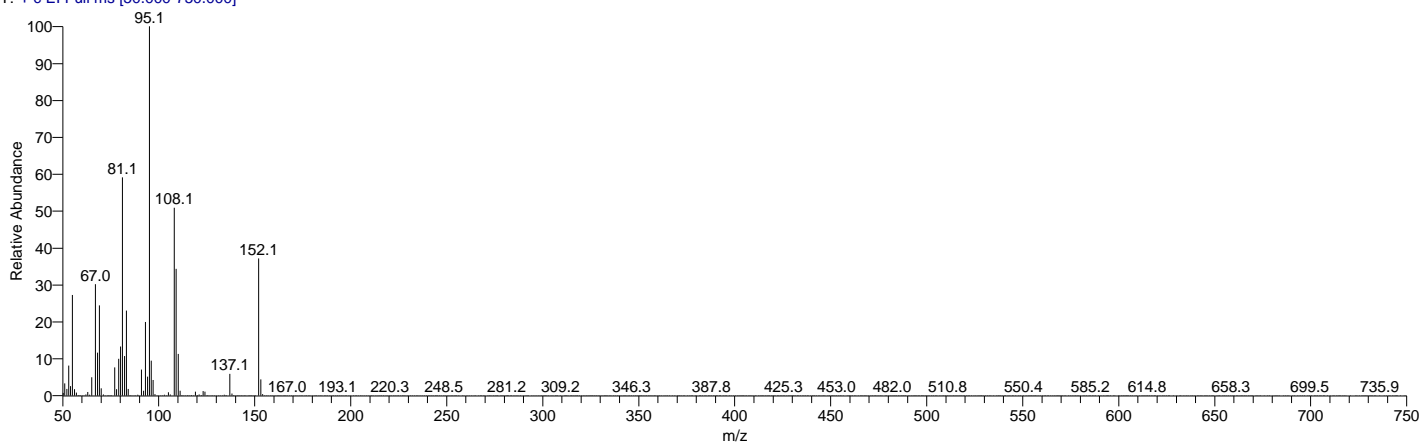

| RT   | Compound Name                                       | Area % | MF  | Molecular Formula | Molecular Weight | Cas #    | Library         |
|------|-----------------------------------------------------|--------|-----|-------------------|------------------|----------|-----------------|
| 4.74 | (+)-2-Bornanone                                     | 56.43  | 940 | C10H16O           | 152              | 464-49-3 | replib          |
| 4.74 | BICYCLO[2.2.1]HEPTAN-2-ONE, 1,7,7-TRIMETHYL-        | 56.43  | 942 | C10H16O           | 152              | 76-22-2  | WileyRegistry8e |
| 4.74 | (+)-2-Bornanone                                     | 56.43  | 937 | C10H16O           | 152              | 464-49-3 | replib          |
| 4.74 | Bicyclo[2.2.1]heptan-2-one, 1,7,7-trimethyl-, (1S)- | 56.43  | 944 | C10H16O           | 152              | 464-48-2 | mainlib         |
| 4.74 | BICYCLO[2.2.1]HEPTAN-2-ONE, 1,7,7-TRIMETHYL-        | 56.43  | 934 | C10H16O           | 152              | 76-22-2  | WileyRegistry8e |

# My GC-MS Report

Compound Structure

Hit Spectrum

(+)-2-Bornanone  
Formula C<sub>10</sub>H<sub>16</sub>O, MW 152, CAS# 464-49-3, Entry# 14551  
Bicyclo[2.2.1]heptan-2-one, 1,7,7-trimethyl-, (1R)-

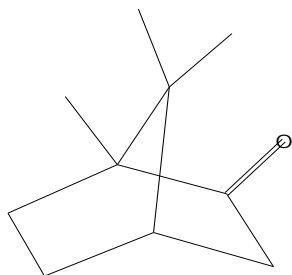

SI 939, RSI 940, replib, Entry# 14551, CAS# 464-49-3, (+)-2-Bornanone

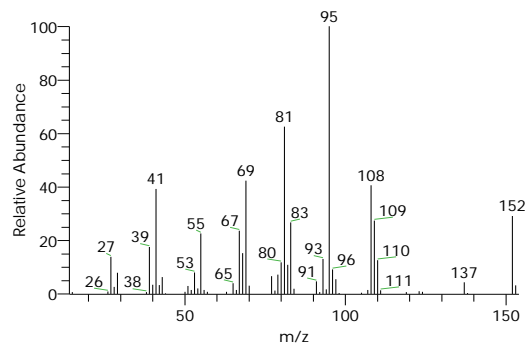

BICYCLO[2.2.1]HEPTAN-2-ONE, 1,7,7-TRIMETHYL-  
Formula C<sub>10</sub>H<sub>16</sub>O, MW 152, CAS# 76-22-2, Entry# 36210  
NORBORNAN-2-ONE

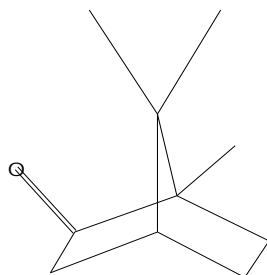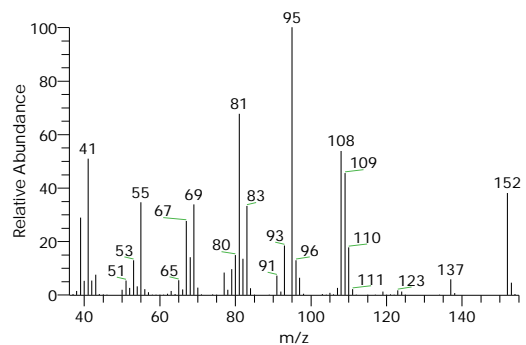

(+)-2-Bornanone  
Formula C<sub>10</sub>H<sub>16</sub>O, MW 152, CAS# 464-49-3, Entry# 14554  
Bicyclo[2.2.1]heptan-2-one, 1,7,7-trimethyl-, (1R)-



SI 937, RSI 937, replib, Entry# 14554, CAS# 464-49-3, (+)-2-Bornanone

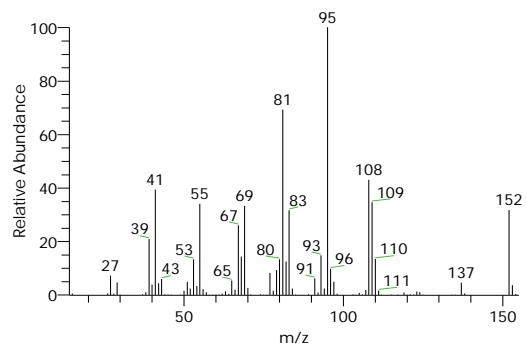

Bicyclo[2.2.1]heptan-2-one, 1,7,7-trimethyl-, (1S)-  
Formula C<sub>10</sub>H<sub>16</sub>O, MW 152, CAS# 464-48-2, Entry# 68159  
(-)-Alcanfor

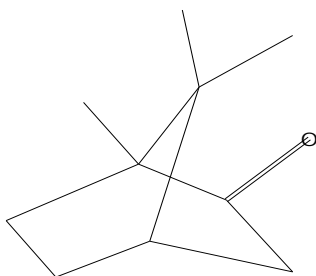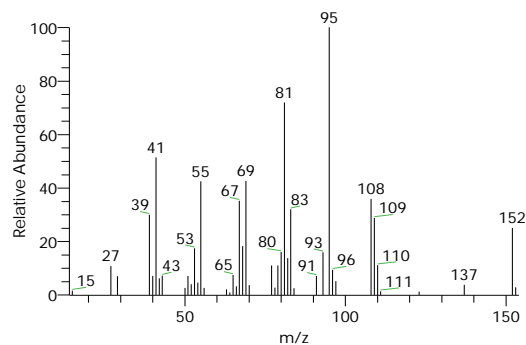

# My GC-MS Report

Compound Structure

Hit Spectrum

BICYCLO[2.2.1]HEPTAN-2-ONE, 1,7,7-TRIMETHYL-  
Formula C<sub>10</sub>H<sub>16</sub>O, MW 152, CAS# 76-22-2, Entry# 394883  
NORBORNAN-2-ONE

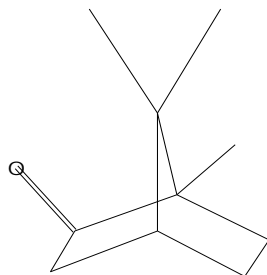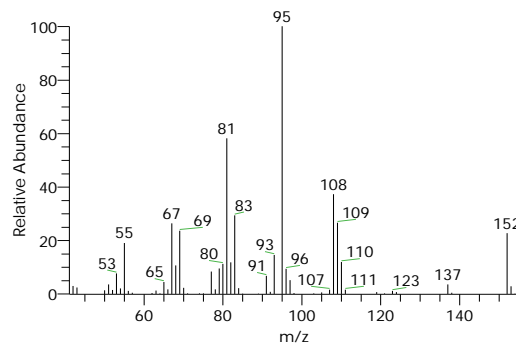

Rosemary\_Oil #306 RT: 5.02 AV: 1 NL: 7.88E7  
T: + c EI Full ms [50.000-750.000]

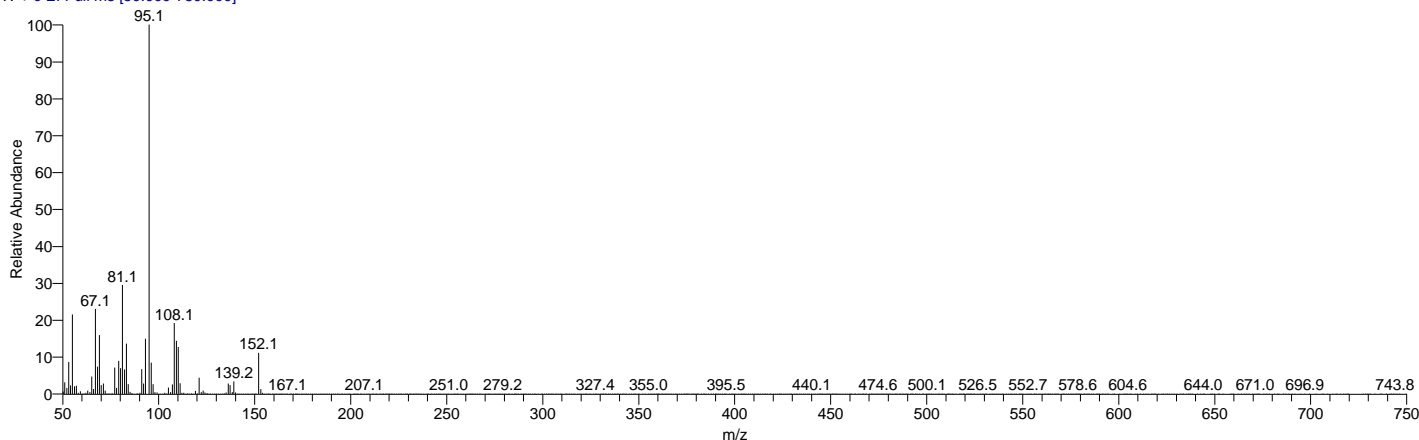

| RT   | Compound Name                                       | Area % | MF  | Molecular Formula                 | Molecular Weight | Cas #    | Library             |
|------|-----------------------------------------------------|--------|-----|-----------------------------------|------------------|----------|---------------------|
| 5.02 | Bicyclo[2.2.1]heptan-2-one, 1,7,7-trimethyl-, (1S)- | 0.12   | 919 | C <sub>10</sub> H <sub>16</sub> O | 152              | 464-48-2 | mainlib             |
| 5.02 | Camphor                                             | 0.12   | 862 | C <sub>10</sub> H <sub>16</sub> O | 152              | 76-22-2  | replib              |
| 5.02 | 1,7,7-TRIMETHYL-BICYCLO[2.2.1]HEPTAN-2-ONE          | 0.12   | 862 | C <sub>10</sub> H <sub>16</sub> O | 152              | NA       | WileyRegi<br>stry8e |
| 5.02 | BICYCLO[2.2.1]HEPTAN-2-ONE, 1,7,7-TRIMETHYL-        | 0.12   | 868 | C <sub>10</sub> H <sub>16</sub> O | 152              | 76-22-2  | WileyRegi<br>stry8e |
| 5.02 | Camphor                                             | 0.12   | 863 | C <sub>10</sub> H <sub>16</sub> O | 152              | 76-22-2  | replib              |

Compound Structure

Hit Spectrum

Bicyclo[2.2.1]heptan-2-one, 1,7,7-trimethyl-, (1S)-  
Formula C<sub>10</sub>H<sub>16</sub>O, MW 152, CAS# 464-48-2, Entry# 68159  
(-)-Alcanfor

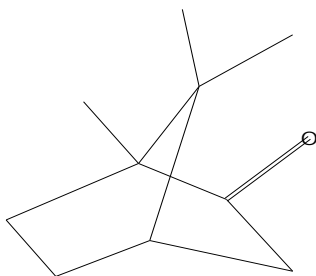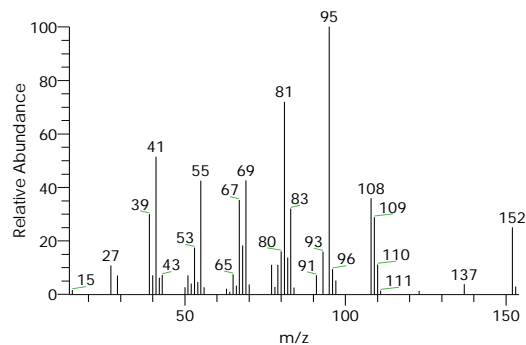

# My GC-MS Report

Compound Structure

Hit Spectrum

Camphor

Formula C<sub>10</sub>H<sub>16</sub>O, MW 152, CAS# 76-22-2, Entry# 14454  
Bicyclo[2.2.1]heptan-2-one, 1,7,7-trimethyl-

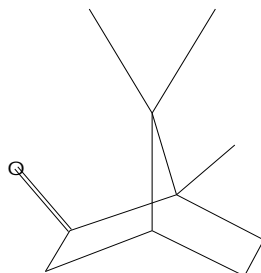

SI 850, RSI 862, replib, Entry# 14454, CAS# 76-22-2, Camphor

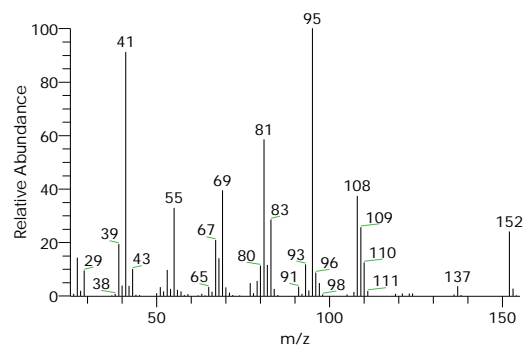

1,7,7-TRIMETHYL-BICYCLO[2.2.1]HEPTAN-2-ONE  
Formula C<sub>10</sub>H<sub>16</sub>O, MW 152, CAS# NA, Entry# 371259  
1,7,7-TRIMETHYLBICYCLO[2.2.1]HEPTAN-2-ONE

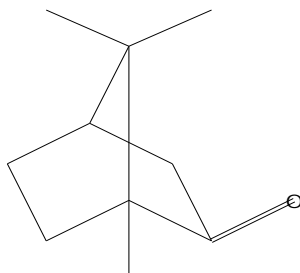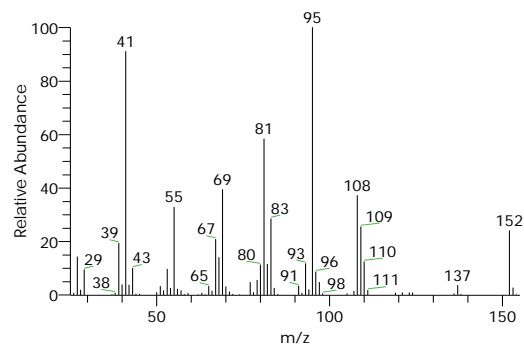

BICYCLO[2.2.1]HEPTAN-2-ONE, 1,7,7-TRIMETHYL-  
Formula C<sub>10</sub>H<sub>16</sub>O, MW 152, CAS# 76-22-2, Entry# 394883  
NORBORNAN-2-ONE

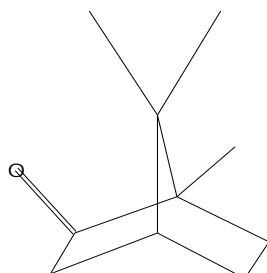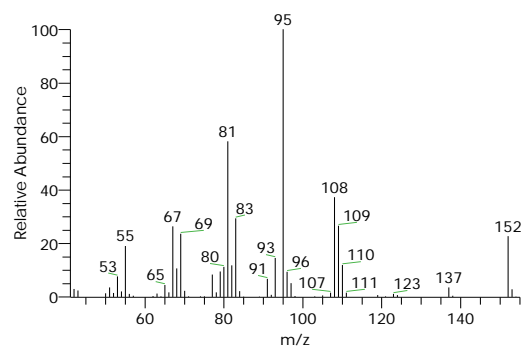

Camphor

Formula C<sub>10</sub>H<sub>16</sub>O, MW 152, CAS# 76-22-2, Entry# 14453  
Bicyclo[2.2.1]heptan-2-one, 1,7,7-trimethyl-

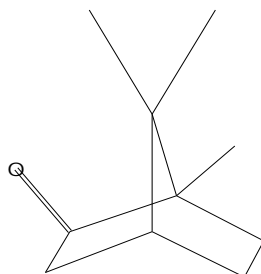

SI 849, RSI 863, replib, Entry# 14453, CAS# 76-22-2, Camphor

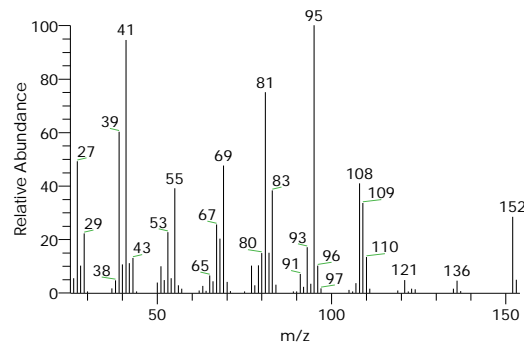

# My GC-MS Report

Rosemary\_Oil #381 RT: 5.27 AV: 1 NL: 2.69E8  
T: + c EI Full ms [50.000-750.000]

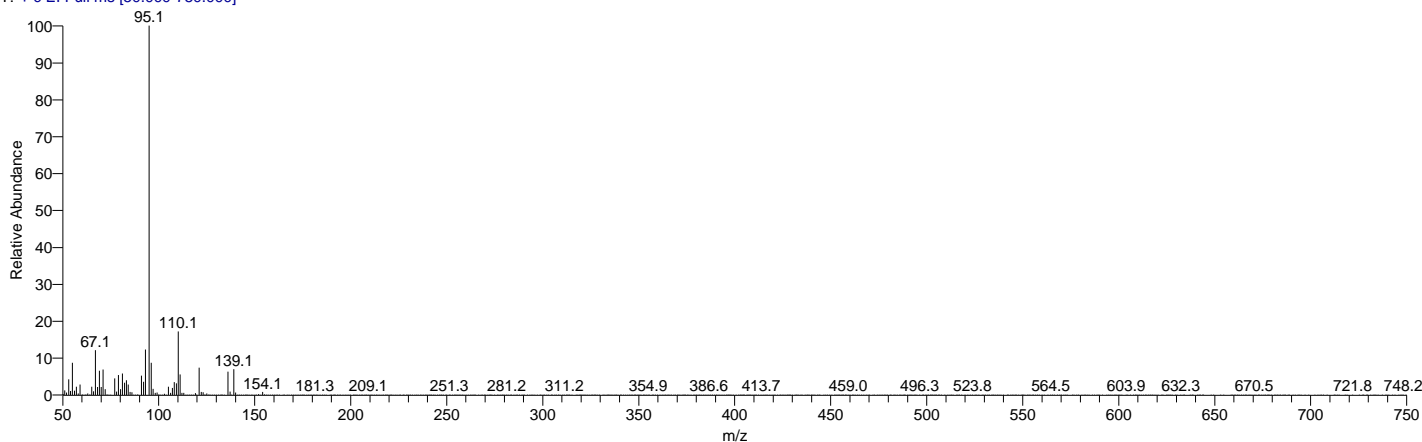

| RT   | Compound Name                                           | Area % | MF  | Molecular Formula | Molecular Weight | Cas #    | Library             |
|------|---------------------------------------------------------|--------|-----|-------------------|------------------|----------|---------------------|
| 5.27 | Isorneol                                                | 7.16   | 935 | C10H18O           | 154              | 124-76-5 | replib              |
| 5.27 | endo-Borneol                                            | 7.16   | 933 | C10H18O           | 154              | 507-70-0 | replib              |
| 5.27 | endo-Borneol                                            | 7.16   | 931 | C10H18O           | 154              | 507-70-0 | mainlib             |
| 5.27 | BICYCLO[2.2.1]HEPTAN-2-OL, 1,7,7-TRIMETHYL-, (1S-ENDO)- | 7.16   | 926 | C10H18O           | 154              | 464-45-9 | WileyRegi<br>stry8e |
| 5.27 | Bicyclo[2.2.1]heptan-2-ol, 1,7,7-trimethyl-, (1S-endo)- | 7.16   | 928 | C10H18O           | 154              | 464-45-9 | replib              |

## Compound Structure

## Hit Spectrum

Isorneol  
Formula C10H18O, MW 154, CAS# 124-76-5, Entry# 14437  
Bicyclo[2.2.1]heptan-2-ol, 1,7,7-trimethyl-, exo-

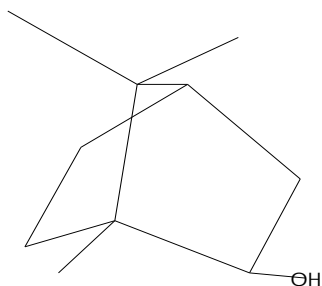

SI 935, RSI 935, replib, Entry# 14437, CAS# 124-76-5, Isorneol

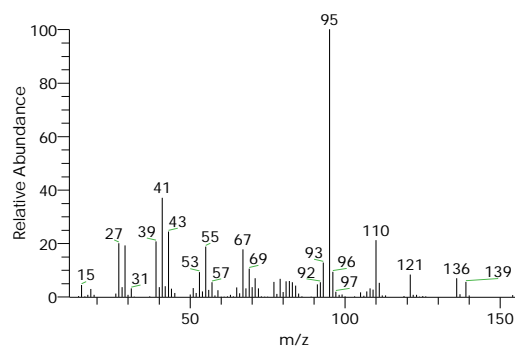

endo-Borneol  
Formula C10H18O, MW 154, CAS# 507-70-0, Entry# 14458  
endo-2-Hydroxy-1,7,7-trimethylbornane

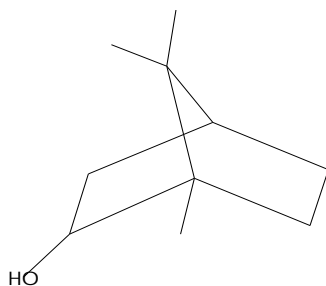

SI 931, RSI 933, replib, Entry# 14458, CAS# 507-70-0, endo-Borneol

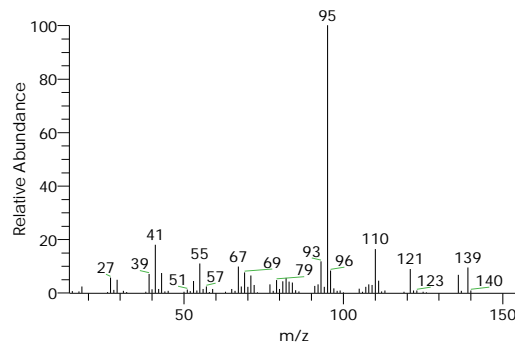

# My GC-MS Report

Compound Structure

Hit Spectrum

endo-Borneol  
Formula C<sub>10</sub>H<sub>18</sub>O, MW 154, CAS# 507-70-0, Entry# 68442  
endo-2-Hydroxy-1,7,7-trimethylnorbornane

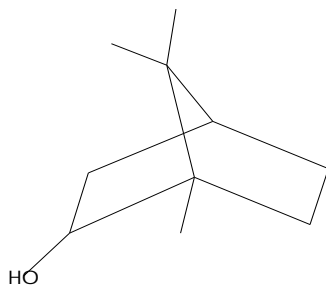

SI 931, RSI 931, mainlib, Entry# 68442, CAS# 507-70-0, endo-Borneol

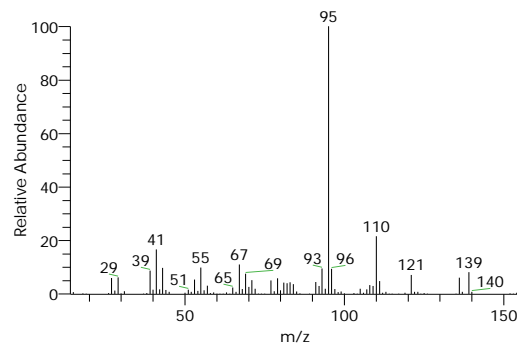

BICYCLO[2.2.1]HEPTAN-2-OL, 1,7,7-TRIMETHYL-, (1S-ENDO)-  
Formula C<sub>10</sub>H<sub>18</sub>O, MW 154, CAS# 464-45-9, Entry# 38741  
1,7,7-TRIMETHYLBICYCLO[2.2.1]HEPTAN-2-OL #

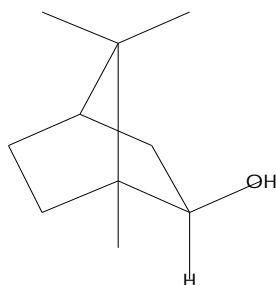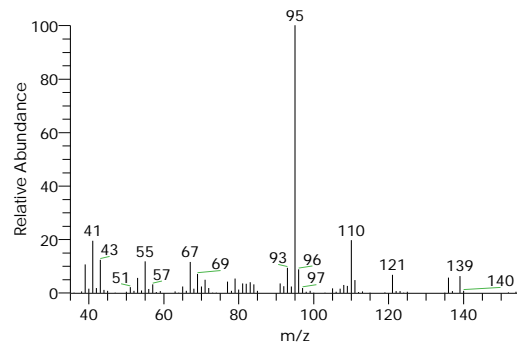

Bicyclo[2.2.1]heptan-2-ol, 1,7,7-trimethyl-, (1S-endo)-  
Formula C<sub>10</sub>H<sub>18</sub>O, MW 154, CAS# 464-45-9, Entry# 14433  
Borneol, (1S,2R,4S)-(-)-

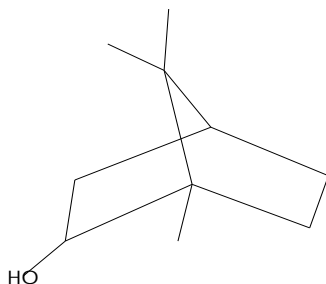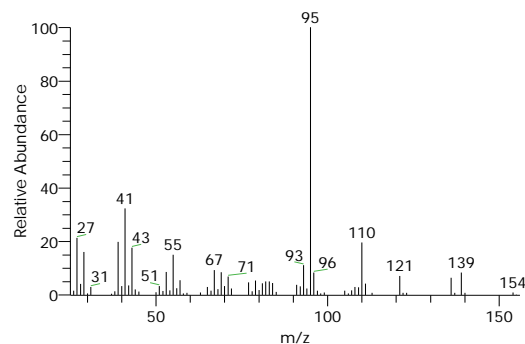

Rosemary\_Oil #534 RT: 5.79 AV: 1 NL: 7.17E7  
T: + c EI Full ms [50.000-750.000]

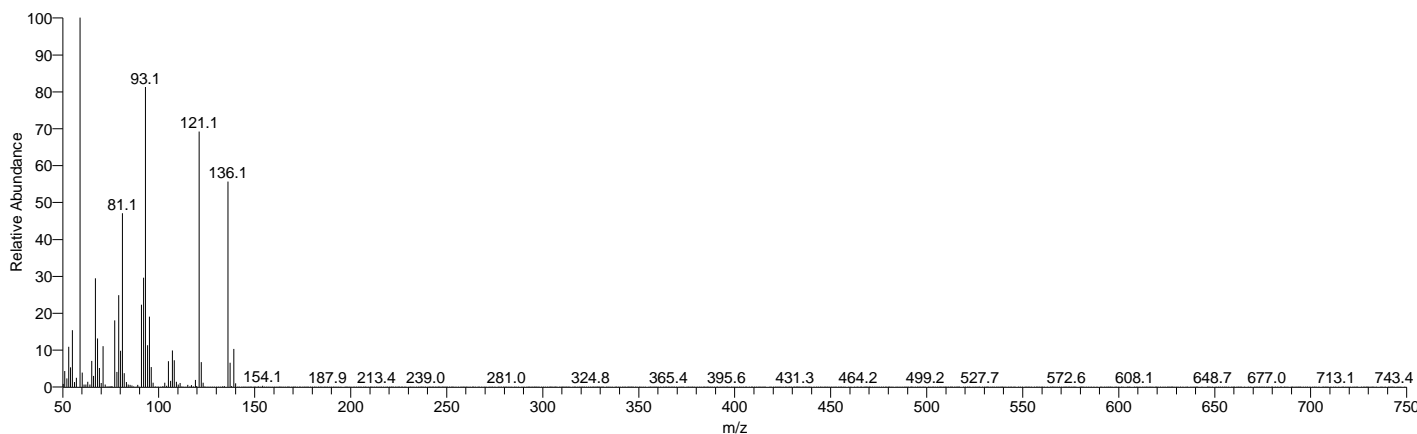

| RT   | Compound Name                              | Area % | MF  | Molecular Formula                 | Molecular Weight | Cas #   | Library   |
|------|--------------------------------------------|--------|-----|-----------------------------------|------------------|---------|-----------|
| 5.79 | (-)-(1S,2R,4R)-BETA-FENCHOL                | 5.40   | 937 | C <sub>10</sub> H <sub>18</sub> O | 154              | 470-08  | WileyRegi |
| 5.79 | 3-CYCLOHEXENE-1-METHANOL, à,à,4-TRIMETHYL- | 5.40   | 927 | C <sub>10</sub> H <sub>18</sub> O | 154              | 98-55-5 | stry8e    |

# My GC-MS Report

| RT   | Compound Name                                   | Area % | MF  | Molecular Formula | Molecular Weight | Cas #          | Library             |
|------|-------------------------------------------------|--------|-----|-------------------|------------------|----------------|---------------------|
| 5.79 | 3-CYCLOHEXENE-1-METHANOL                        | 5.40   | 926 | C10H18O           | 154              | 98-55-5        | WileyRegi<br>stry8e |
| 5.79 | , à,à,4-TRIMETHYL-<br>3-CYCLOHEXENE-1-METHANOL  | 5.40   | 928 | C10H18O           | 154              | 10482-5<br>6-1 | WileyRegi<br>stry8e |
| 5.79 | 1,6-OCTADIEN-3-OL,<br>3,7-DIMETHYL-, PROPANOATE | 5.40   | 931 | C13H22O2          | 210              | 144-39<br>-8   | WileyRegi<br>stry8e |

Compound Structure

Hit Spectrum

(-)-(1S,2R,4R)-BETA-FENCHOL  
Formula C10H18O, MW 154, CAS# 470-08-6, Entry# 38737  
(-)-BETA-FENCHOL

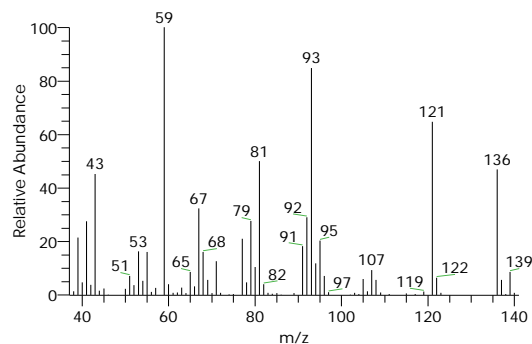

3-CYCLOHEXENE-1-METHANOL, à,à,4-TRIMETHYL-  
Formula C10H18O, MW 154, CAS# 98-55-5, Entry# 38742  
3-CYCLOHEXENE-1-METHANOL, à,à,4-TRIMETHYL-, (S)-

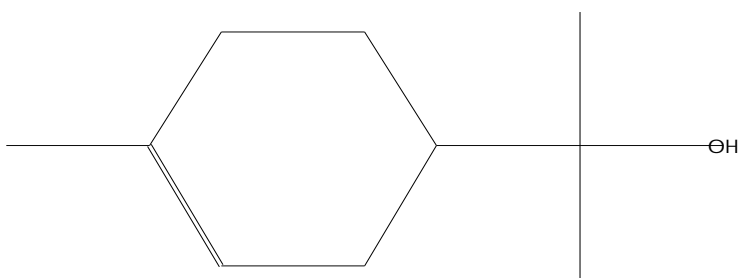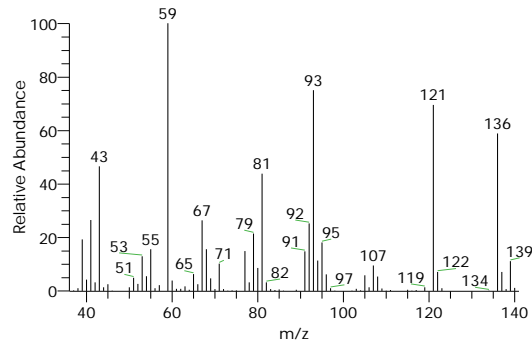

3-CYCLOHEXENE-1-METHANOL, à,à,4-TRIMETHYL-  
Formula C10H18O, MW 154, CAS# 98-55-5, Entry# 38365  
3-CYCLOHEXENE-1-METHANOL, à,à,4-TRIMETHYL-, (S)-

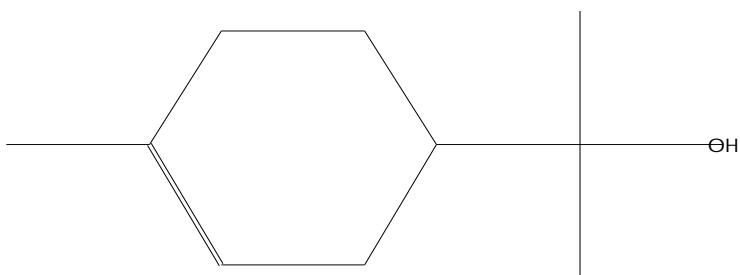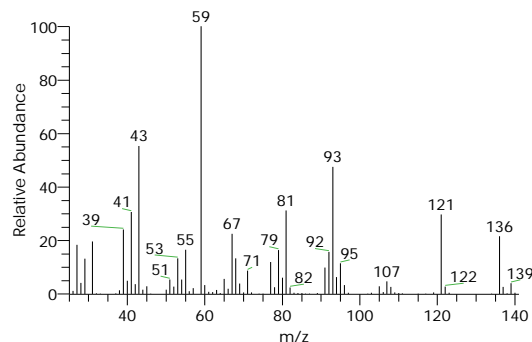

3-CYCLOHEXENE-1-METHANOL, à,à,4-TRIMETHYL-, (S)-  
Formula C10H18O, MW 154, CAS# 10482-56-1, Entry# 38380  
2-(4-METHYL-3-CYCLOHEXEN-1-YL)-2-PROPANOL #

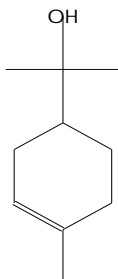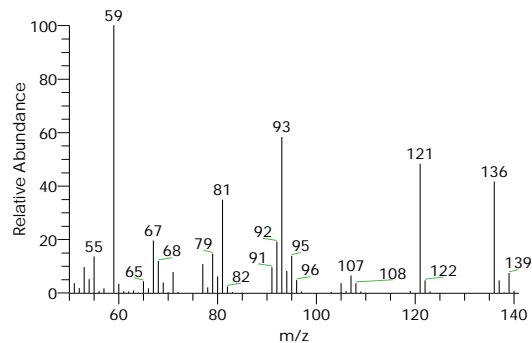

# My GC-MS Report

Compound Structure

Hit Spectrum

1,6-OCTADIEN-3-OL, 3,7-DIMETHYL-, PROPANOATE  
Formula C<sub>13</sub>H<sub>22</sub>O<sub>2</sub>, MW 210, CAS# 144-39-8, Entry# 96030  
1,5-DIMETHYL-1-VINYL-4-HEXENYL PROPIONATE #

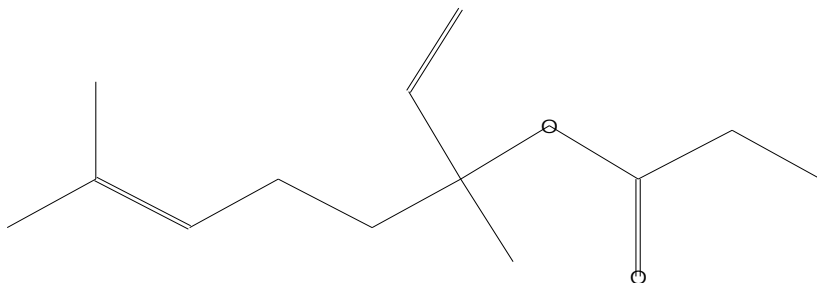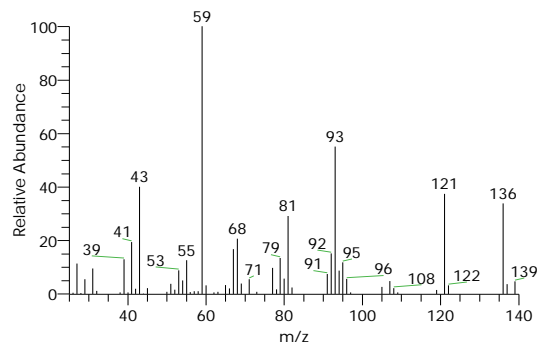

Rosemary\_Oil #1064 RT: 7.57 AV: 1 NL: 6.70E7  
T: + c EI Full ms [50.000-750.000]

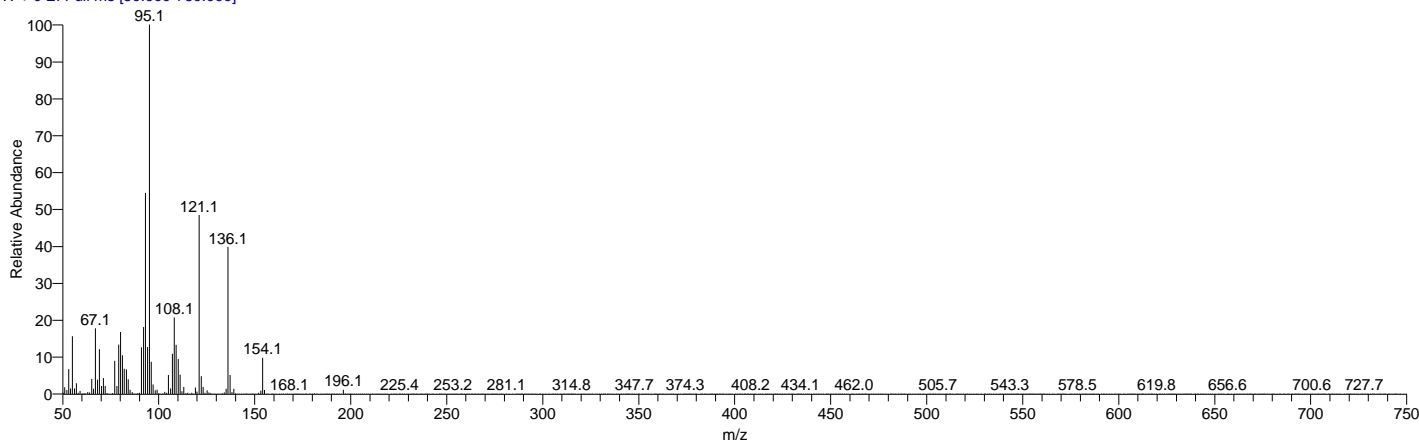

| RT   | Compound Name                                                    | Area % | MF  | Molecular Formula                              | Molecular Weight | Cas #      | Library             |
|------|------------------------------------------------------------------|--------|-----|------------------------------------------------|------------------|------------|---------------------|
| 7.57 | BICYCLO[2.2.1]HEPTAN-2-OL, 1,7,7-TRIMETHYL-, ACETATE, (1S-ENDO)- | 3.69   | 953 | C <sub>12</sub> H <sub>20</sub> O <sub>2</sub> | 196              | 5655-6 1-8 | WileyRegi<br>stry8e |
| 7.57 | BICYCLO[2.2.1]HEPTAN-2-OL, 1,7,7-TRIMETHYL-, ACETATE, ENDO-      | 3.69   | 945 | C <sub>12</sub> H <sub>20</sub> O <sub>2</sub> | 196              | 76-49-3    | WileyRegi<br>stry8e |
| 7.57 | Bornyl acetate                                                   | 3.69   | 943 | C <sub>12</sub> H <sub>20</sub> O <sub>2</sub> | 196              | 76-49-3    | mainlib             |
| 7.57 | Bicyclo[2.2.1]heptan-2-ol, 1,7,7-trimethyl-, acetate, (1S-endo)- | 3.69   | 938 | C <sub>12</sub> H <sub>20</sub> O <sub>2</sub> | 196              | 5655-6 1-8 | mainlib             |
| 7.57 | BICYCLO[2.2.1]HEPTAN-2-OL, 1,7,7-TRIMETHYL-, ACETATE, EXO-       | 3.69   | 936 | C <sub>12</sub> H <sub>20</sub> O <sub>2</sub> | 196              | 125-12 -2  | WileyRegi<br>stry8e |

Compound Structure

Hit Spectrum

BICYCLO[2.2.1]HEPTAN-2-OL, 1,7,7-TRIMETHYL-, ACETATE, (1S-ENDO)-  
Formula C<sub>12</sub>H<sub>20</sub>O<sub>2</sub>, MW 196, CAS# 5655-61-8, Entry# 80072  
1,7,7-TRIMETHYLBICYCLO[2.2.1]HEPT-2-YL ACETATE #

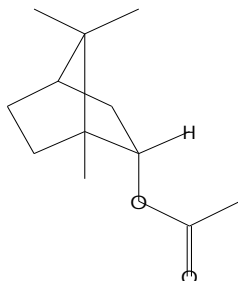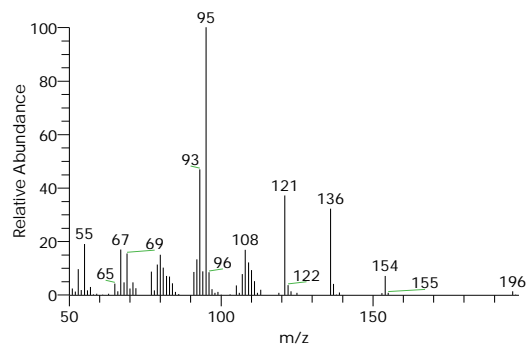



# My GC-MS Report

Compound Structure

Hit Spectrum

BICYCLO[2.2.1]HEPTAN-2-OL, 1,7,7-TRIMETHYL-, ACETATE, ENDO-  
Formula C<sub>12</sub>H<sub>20</sub>O<sub>2</sub>, MW 196, CAS# 76-49-3, Entry# 80076  
1,7,7-TRIMETHYLBICYCLO[2.2.1]HEPT-2-YL ACETATE #

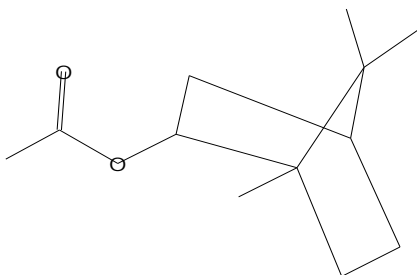

Bornyl acetate

Formula C<sub>12</sub>H<sub>20</sub>O<sub>2</sub>, MW 196, CAS# 76-49-3, Entry# 67808  
Bicyclo[2.2.1]heptan-2-ol, 1,7,7-trimethyl-, acetate, endo-

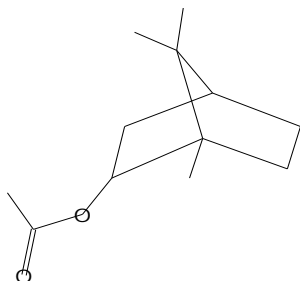

Bicyclo[2.2.1]heptan-2-ol, 1,7,7-trimethyl-, acetate, (1S-endo)-  
Formula C<sub>12</sub>H<sub>20</sub>O<sub>2</sub>, MW 196, CAS# 5655-61-8, Entry# 68273  
Borneol, acetate, (1S,2R,4S)-(-)-

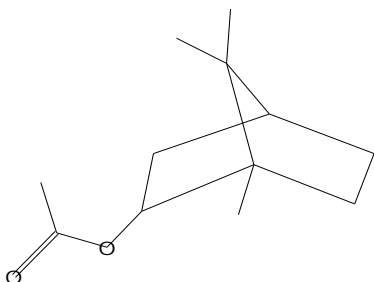

BICYCLO[2.2.1]HEPTAN-2-OL, 1,7,7-TRIMETHYL-, ACETATE, EXO-  
Formula C<sub>12</sub>H<sub>20</sub>O<sub>2</sub>, MW 196, CAS# 125-12-2, Entry# 80091  
1,7,7-TRIMETHYLBICYCLO[2.2.1]HEPT-2-YL ACETATE #

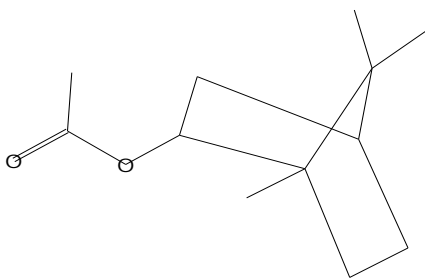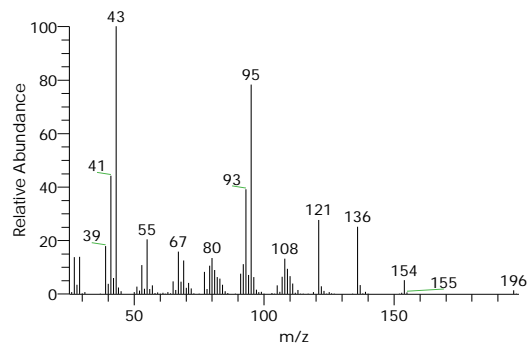

SI 942, RSI 943, mainlib, Entry# 67808, CAS# 76-49-3, Bornyl acetate

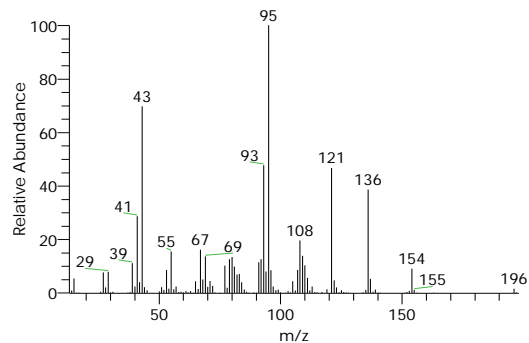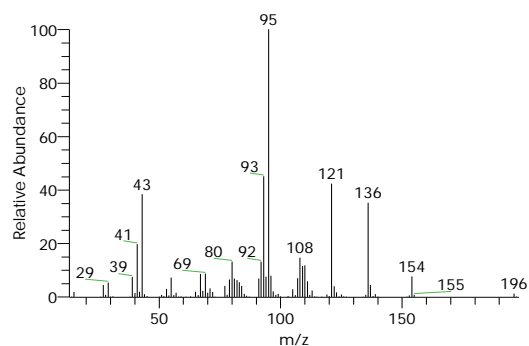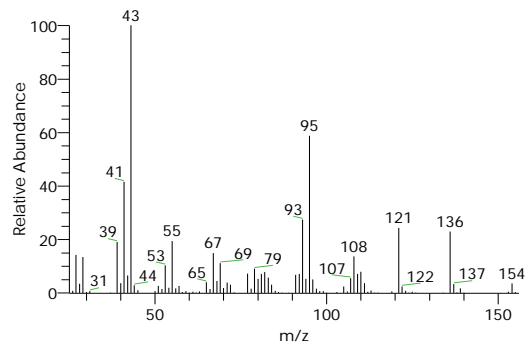

# My GC-MS Report

Rosemary\_Oil #1641 RT: 9.50 AV: 1 NL: 4.35E6  
T: + c EI Full ms [50.000-750.000]

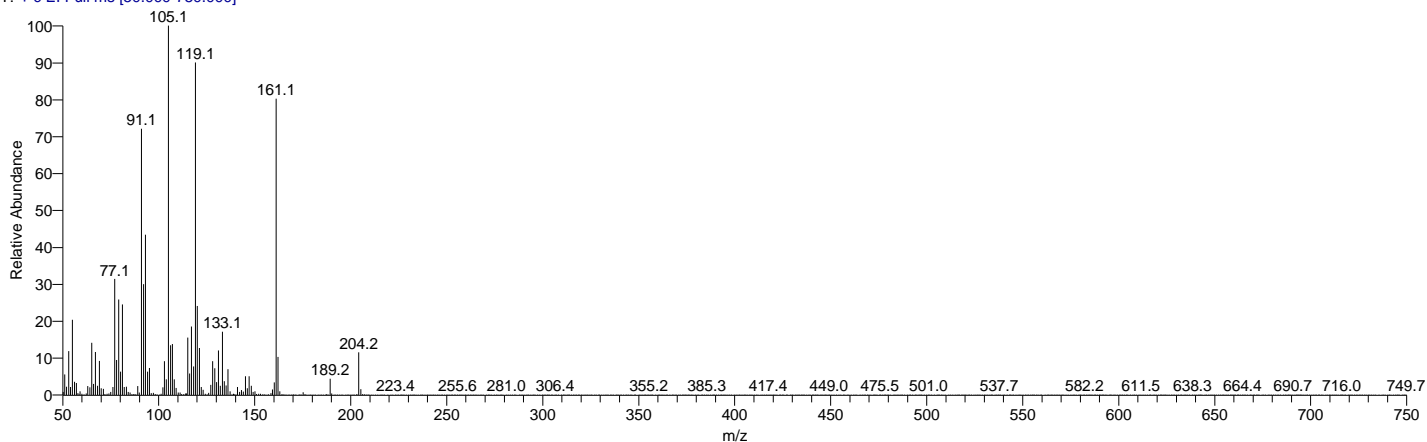

| RT   | Compound Name                                                                   | Area % | MF  | Molecular Formula | Molecular Weight | Cas #         | Library             |
|------|---------------------------------------------------------------------------------|--------|-----|-------------------|------------------|---------------|---------------------|
| 9.50 | .alfa.-Copaene                                                                  | 0.34   | 928 | C15H24            | 204              | NA            | mainlib             |
| 9.50 | TRICYCLO[4.4.0.0(2,7)]DEC-3-EN<br>E,<br>1,3-DIMETHYL-8-(1-METHYLET<br>HYL)-, ST | 0.34   | 941 | C15H24            | 204              | 3856-2<br>5-5 | WileyRegi<br>stry8e |
| 9.50 | TRICYCLO[4.4.0.0(2,7)]DEC-3-EN<br>E,<br>1,3-DIMETHYL-8-(1-METHYLET<br>HYL)-, ST | 0.34   | 913 | C15H24            | 204              | 3856-2<br>5-5 | WileyRegi<br>stry8e |
| 9.50 | Copaene                                                                         | 0.34   | 911 | C15H24            | 204              | 3856-2<br>5-5 | replib              |
| 9.50 | TRICYCLO[4.4.0.0(2,7)]DEC-3-EN<br>E,<br>1,3-DIMETHYL-8-(1-METHYLET<br>HYL)-, ST | 0.34   | 909 | C15H24            | 204              | 3856-2<br>5-5 | WileyRegi<br>stry8e |

## Compound Structure

## Hit Spectrum

.alfa.-Copaene  
Formula C15H24, MW 204, CAS# NA, Entry# 150578  
\$:28VLXDPFLIRFYIME-UHFFFAOYSA-N

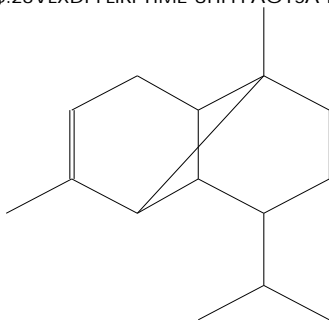

SI 921, RSI 928, mainlib, Entry# 150578, CAS# NA, .alfa.-Copaene

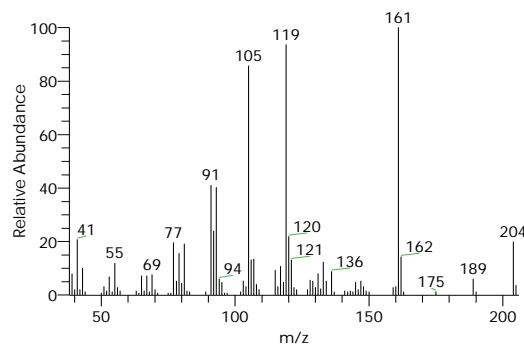

TRICYCLO[4.4.0.0(2,7)]DEC-3-ENE, 1,3-DIMETHYL-8-(1-METHYLETHYL)-, ST  
Formula C15H24, MW 204, CAS# 3856-25-5, Entry# 89462  
TRICYCLO[4.4.0.0(2,7)]DEC-3-ENE, 1,3-DIMETHYL-8-(1-METHYLETHYL)-, STEREOISOMER

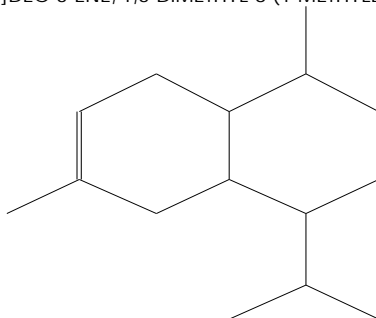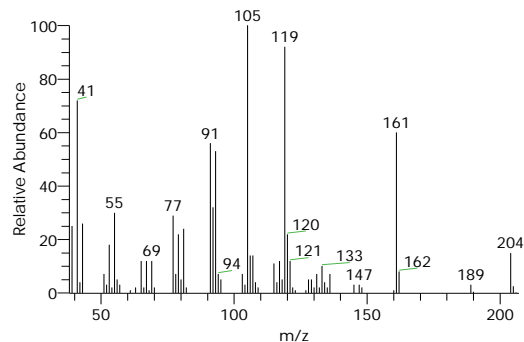

# My GC-MS Report

Compound Structure

Hit Spectrum

TRICYCLO[4.4.0.0(2,7)]DEC-3-ENE, 1,3-DIMETHYL-8-(1-METHYLETHYL)-, ST  
 Formula C<sub>15</sub>H<sub>24</sub>, MW 204, CAS# 3856-25-5, Entry# 89460  
 TRICYCLO[4.4.0.0(2,7)]DEC-3-ENE, 1,3-DIMETHYL-8-(1-METHYLETHYL)-, STEREOISOMER

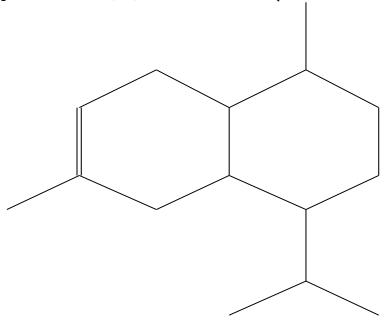

Copaene

Formula C<sub>15</sub>H<sub>24</sub>, MW 204, CAS# 3856-25-5, Entry# 18672  
 Tricyclo[4.4.0.02,7]dec-3-ene, 1,3-dimethyl-8-(1-methylethyl)-, stereoisomer

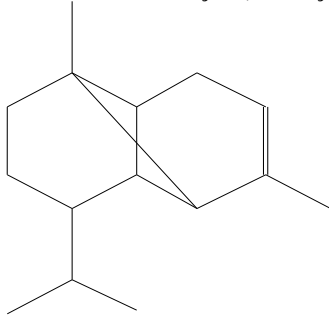

TRICYCLO[4.4.0.0(2,7)]DEC-3-ENE, 1,3-DIMETHYL-8-(1-METHYLETHYL)-, ST  
 Formula C<sub>15</sub>H<sub>24</sub>, MW 204, CAS# 3856-25-5, Entry# 89461  
 TRICYCLO[4.4.0.0(2,7)]DEC-3-ENE, 1,3-DIMETHYL-8-(1-METHYLETHYL)-, STEREOISOMER

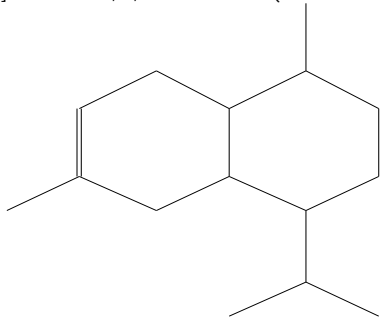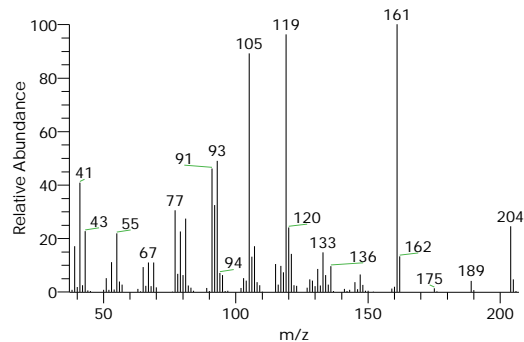

SI 905, RSI 911, replib, Entry# 18672, CAS# 3856-25-5, Copaene

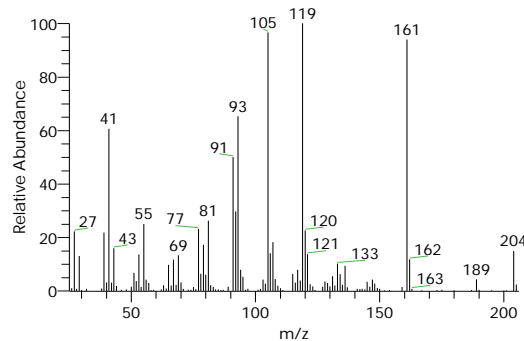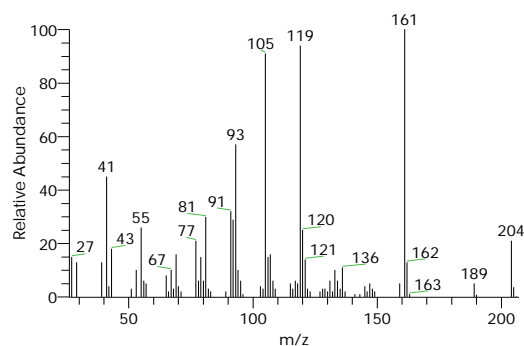

Rosemary\_Oil #1970 RT: 10.60 AV: 1 NL: 1.17E8  
 T: + c EI Full ms [50.000-750.000]

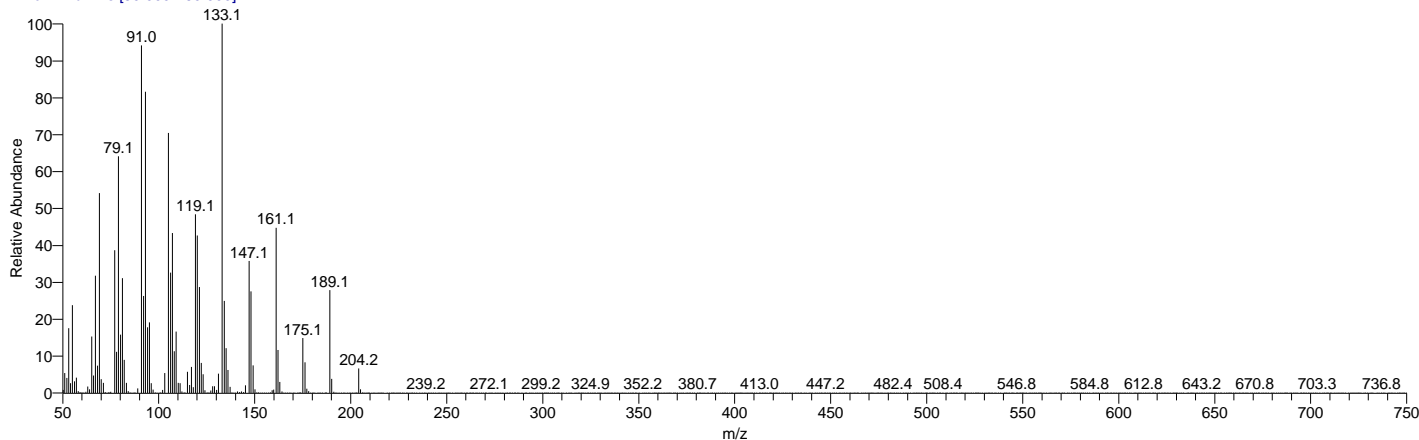

| RT    | Compound Name                                                                        | Area % | MF  | Molecular Formula               | Molecular Weight | Cas #   | Library             |
|-------|--------------------------------------------------------------------------------------|--------|-----|---------------------------------|------------------|---------|---------------------|
| 10.60 | Caryophyllene                                                                        | 23.00  | 947 | C <sub>15</sub> H <sub>24</sub> | 204              | 87-44-5 | mainlib             |
| 10.60 | BICYCLO[7.2.0]UNDEC-4-ENE,<br>4,11,11-TRIMETHYL-8-METHYLE<br>NE-, [1R-(1R*,4E,9S*)]- | 23.00  | 942 | C <sub>15</sub> H <sub>24</sub> | 204              | 87-44-5 | WileyRegi<br>stry8e |

# My GC-MS Report

| RT    | Compound Name                                                                 | Area % | MF  | Molecular Formula | Molecular Weight | Cas #   | Library         |
|-------|-------------------------------------------------------------------------------|--------|-----|-------------------|------------------|---------|-----------------|
| 10.60 | TRANS( $\alpha$ )-CARYOPHYLLENE                                               | 23.00  | 932 | C15H24            | 204              | NA      | WileyRegistry8e |
| 10.60 | BICYCLO[7.2.0]UNDEC-4-ENE, 4,11,11-TRIMETHYL-8-METHYLENE-, [1R-(1R*,4E,9S*)]- | 23.00  | 932 | C15H24            | 204              | 87-44-5 | WileyRegistry8e |
| 10.60 | BICYCLO[7.2.0]UNDEC-4-ENE, 4,11,11-TRIMETHYL-8-METHYLENE-, [1R-(1R*,4E,9S*)]- | 23.00  | 923 | C15H24            | 204              | 87-44-5 | WileyRegistry8e |

## Compound Structure

## Hit Spectrum

Caryophyllene

Formula C15H24, MW 204, CAS# 87-44-5, Entry# 66572

Bicyclo[7.2.0]undec-4-ene, 4,11,11-trimethyl-8-methylene-, [1R-(1R\*,4E,9S\*)]-

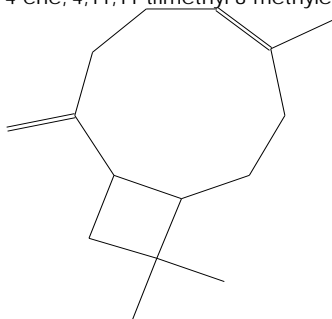

SI 947, RSI 947, mainlib, Entry# 66572, CAS# 87-44-5, Caryophyllene

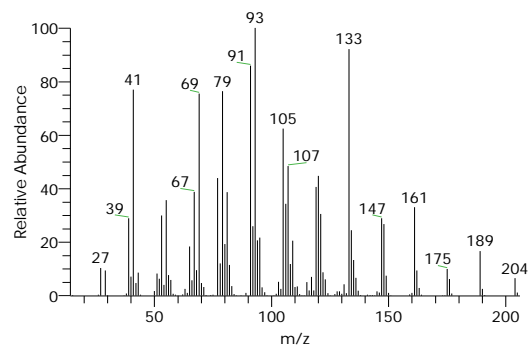

BICYCLO[7.2.0]UNDEC-4-ENE, 4,11,11-TRIMETHYL-8-METHYLENE-, [1R-(1R\*,4E,9S\*)]-

Formula C15H24, MW 204, CAS# 87-44-5, Entry# 89162

2,6,10,10-TETRAMETHYLBICYCLO[7.2.0]UNDECA-1,6-DIENE #

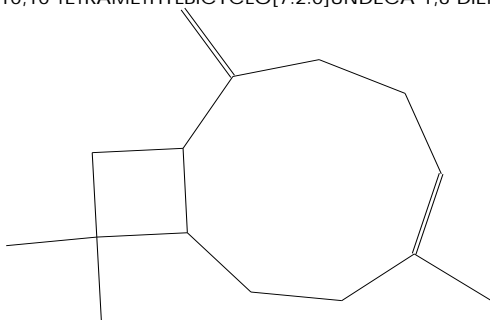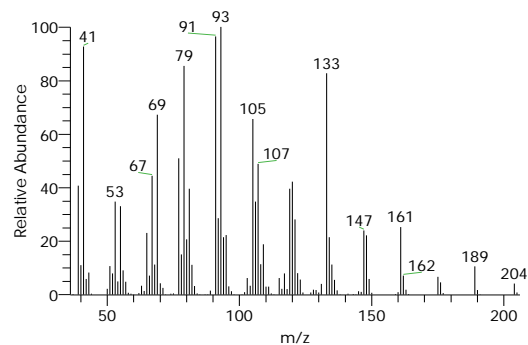

TRANS( $\alpha$ )-CARYOPHYLLENE

Formula C15H24, MW 204, CAS# NA, Entry# 89641

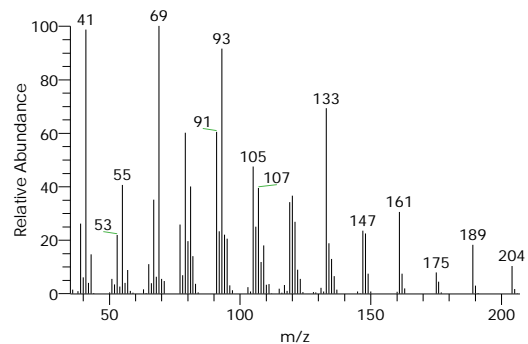

BICYCLO[7.2.0]UNDEC-4-ENE, 4,11,11-TRIMETHYL-8-METHYLENE-, [1R-(1R\*,4E,9S\*)]-

Formula C15H24, MW 204, CAS# 87-44-5, Entry# 89170

2,6,10,10-TETRAMETHYLBICYCLO[7.2.0]UNDECA-1,6-DIENE #

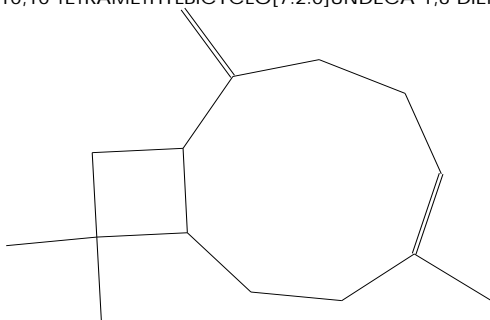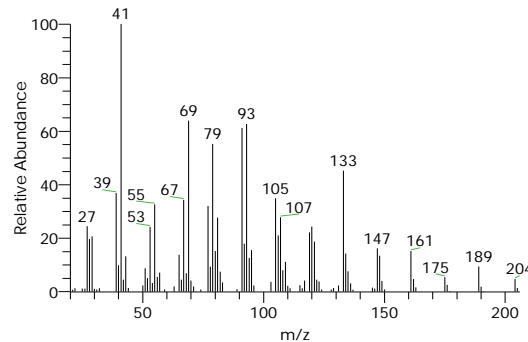

# My GC-MS Report

Compound Structure

Hit Spectrum

BICYCLO[7.2.0]UNDEC-4-ENE, 4,11,11-TRIMETHYL-8-METHYLENE-, [1R-(1R\*,4E,9S\*)]-  
 Formula C<sub>15</sub>H<sub>24</sub>, MW 204, CAS# 87-44-5, Entry# 89160  
 2,6,10,10-TETRAMETHYLBICYCLO[7.2.0]UNDECA-1,6-DIENE #

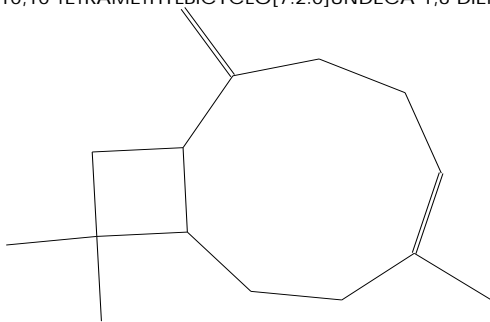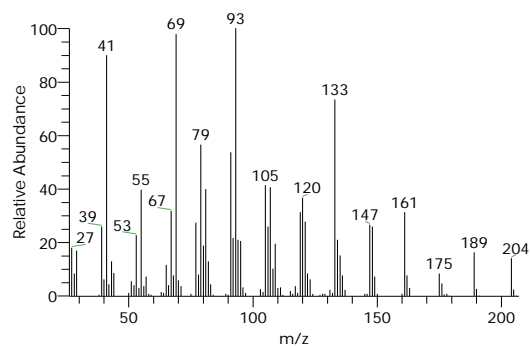

Rosemary\_Oil #2184 RT: 11.32 AV: 1 NL: 7.18E7  
 T: + c EI Full ms [50.000-750.000]

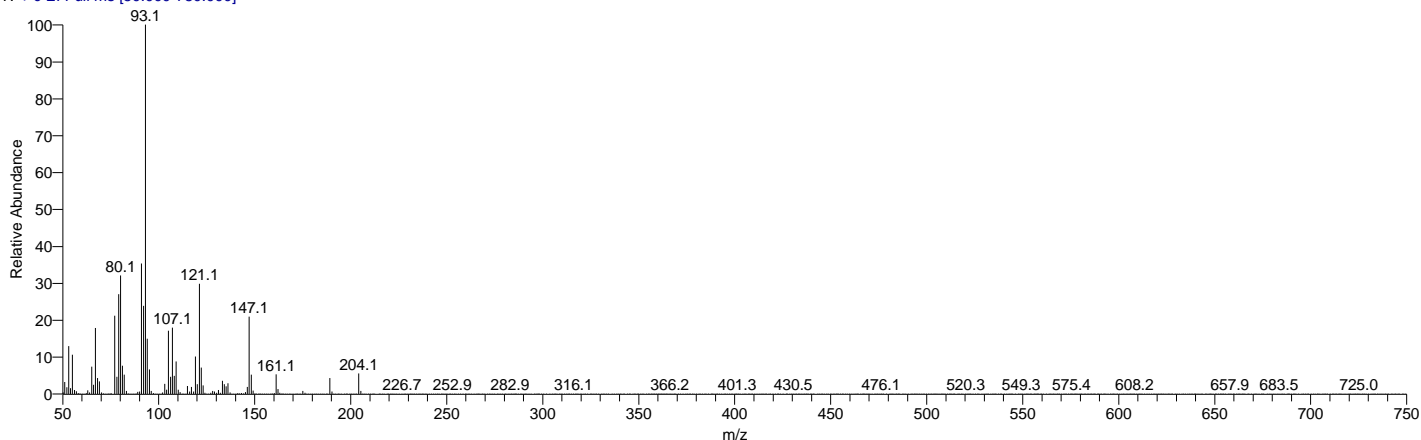

| RT    | Compound Name                                           | Area % | MF  | Molecular Formula               | Molecular Weight | Cas #  | Library   |
|-------|---------------------------------------------------------|--------|-----|---------------------------------|------------------|--------|-----------|
| 11.32 | Humulene                                                | 3.20   | 947 | C <sub>15</sub> H <sub>24</sub> | 204              | 6753-9 | replib    |
| 11.32 | 1,4,8-CYCLOUNDECATRIENE, 2,6,6,9-TETRAMETHYL-, (E,E,E)- | 3.20   | 924 | C <sub>15</sub> H <sub>24</sub> | 204              | 6753-9 | WileyRegi |
| 11.32 | 1,4,8-CYCLOUNDECATRIENE, 2,6,6,9-TETRAMETHYL-, (E,E,E)- | 3.20   | 916 | C <sub>15</sub> H <sub>24</sub> | 204              | 6753-9 | WileyRegi |
| 11.32 | Humulene                                                | 3.20   | 919 | C <sub>15</sub> H <sub>24</sub> | 204              | 6753-9 | replib    |
| 11.32 | 1,4,8-CYCLOUNDECATRIENE, 2,6,6,9-TETRAMETHYL-, (E,E,E)- | 3.20   | 908 | C <sub>15</sub> H <sub>24</sub> | 204              | 6753-9 | WileyRegi |

Compound Structure

Hit Spectrum

Humulene  
 Formula C<sub>15</sub>H<sub>24</sub>, MW 204, CAS# 6753-98-6, Entry# 14003  
 à-Caryophyllene

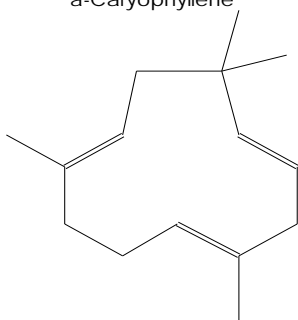

SI 940, RSI 947, replib, Entry# 14003, CAS# 6753-98-6, Humulene

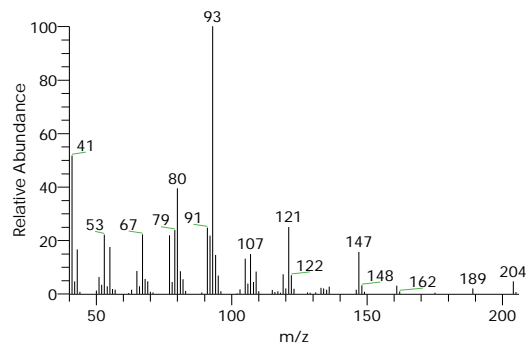

# My GC-MS Report

Compound Structure

Hit Spectrum

1,4,8-CYCLOUNDECATRIENE, 2,6,6,9-TETRAMETHYL-, (E,E,E)-  
Formula C<sub>15</sub>H<sub>24</sub>, MW 204, CAS# 6753-98-6, Entry# 89108  
2,6,6,9-TETRAMETHYL-1,4,8-CYCLOUNDECATRIENE #

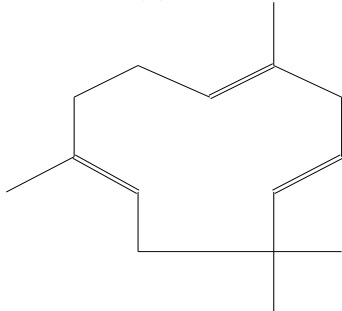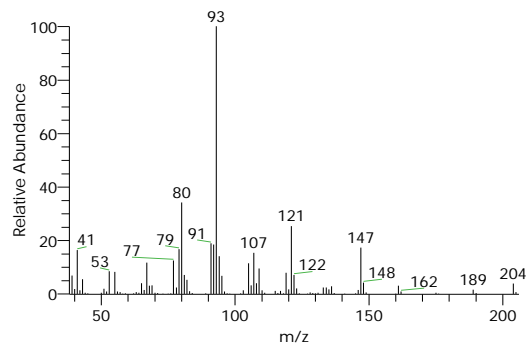

1,4,8-CYCLOUNDECATRIENE, 2,6,6,9-TETRAMETHYL-, (E,E,E)-  
Formula C<sub>15</sub>H<sub>24</sub>, MW 204, CAS# 6753-98-6, Entry# 89110  
2,6,6,9-TETRAMETHYL-1,4,8-CYCLOUNDECATRIENE #

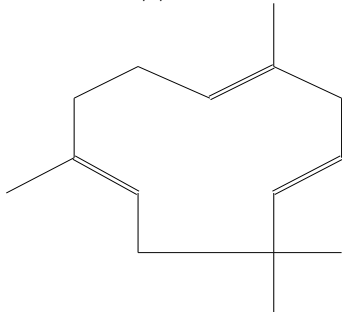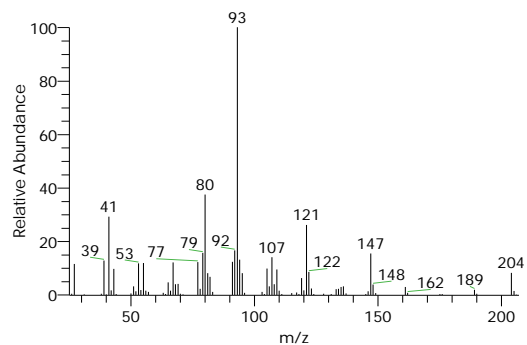

Humulene  
Formula C<sub>15</sub>H<sub>24</sub>, MW 204, CAS# 6753-98-6, Entry# 14104  
à-Caryophyllene

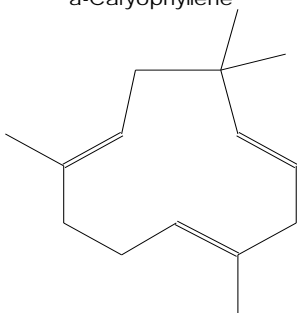

SI 909, RSI 919, replib, Entry# 14104, CAS# 6753-98-6, Humulene

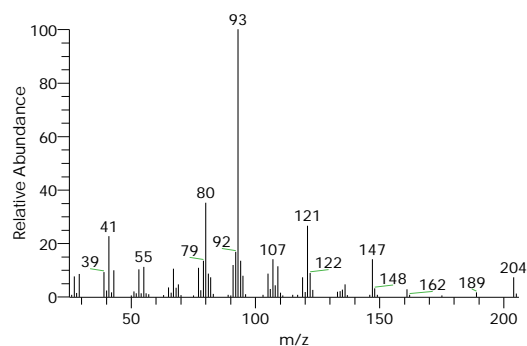

1,4,8-CYCLOUNDECATRIENE, 2,6,6,9-TETRAMETHYL-, (E,E,E)-  
Formula C<sub>15</sub>H<sub>24</sub>, MW 204, CAS# 6753-98-6, Entry# 89113  
2,6,6,9-TETRAMETHYL-1,4,8-CYCLOUNDECATRIENE #

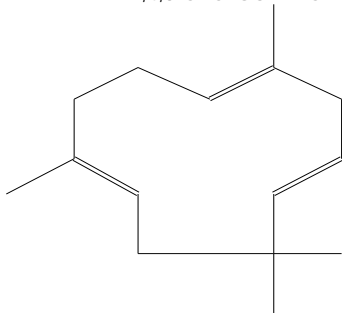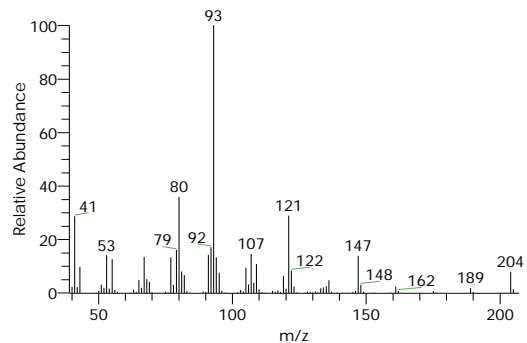

# My GC-MS Report

Rosemary\_Oil #2351 RT: 11.88 AV: 1 NL: 2.80E6  
T: + c EI Full ms [50.000-750.000]

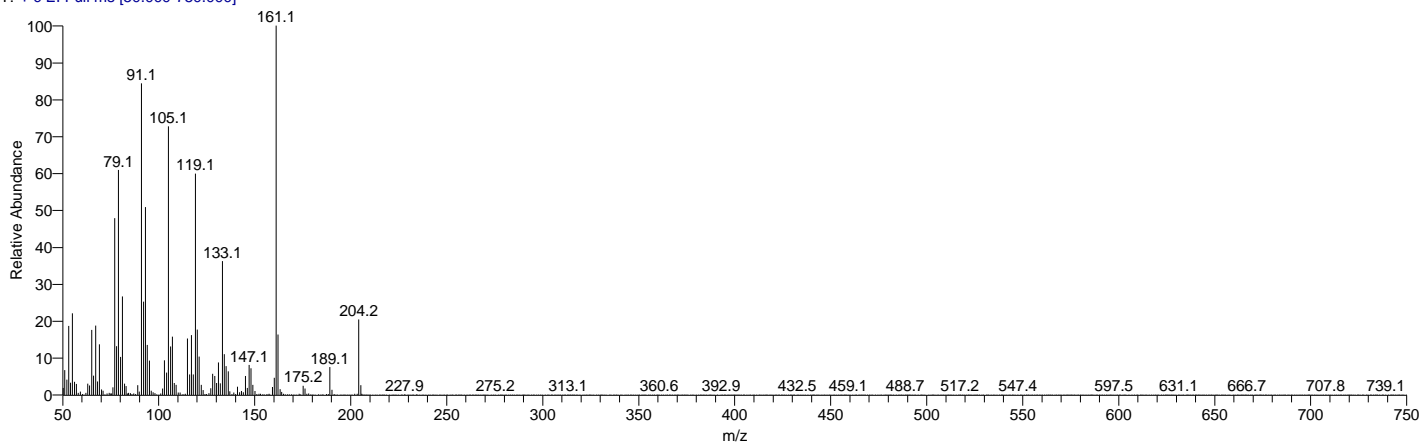

| RT    | Compound Name                                                                                             | Area % | MF  | Molecular Formula | Molecular Weight | Cas #   | Library |
|-------|-----------------------------------------------------------------------------------------------------------|--------|-----|-------------------|------------------|---------|---------|
| 11.88 | ç-Muurolene                                                                                               | 0.26   | 945 | C15H24            | 204              | 30021-7 | replib  |
| 11.88 | Naphthalene,<br>1,2,4a,5,6,8a-hexahydro-4,7-dimethyl-<br>1-1-(1-methylethyl)-                             | 0.26   | 949 | C15H24            | 204              | 483-75  | replib  |
| 11.88 | ç-Muurolene                                                                                               | 0.26   | 926 | C15H24            | 204              | 30021-7 | replib  |
| 11.88 | Naphthalene,<br>1,2,3,4,4a,5,6,8a-octahydro-7-methyl-<br>-4-methylene-1-(1-methylethyl)-<br>(1à,4aà,8aà)- | 0.26   | 913 | C15H24            | 204              | 39029-4 | replib  |
| 11.88 | (1S,4aR,8aS)-1-Isopropyl-7-methyl-4-<br>-methylene-1,2,3,4,4a,5,6,8a-octahyd<br>ronaphthalene             | 0.26   | 912 | C15H24            | 204              | 6980-4  | mainlib |

## Compound Structure

## Hit Spectrum

ç-Muurolene  
Formula C15H24, MW 204, CAS# 30021-74-0, Entry# 24843

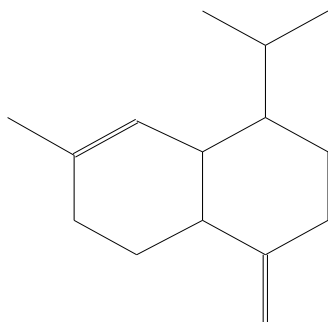

Naphthalene, 1,2,4a,5,6,8a-hexahydro-4,7-dimethyl-1-(1-methylethyl)-  
Formula C15H24, MW 204, CAS# 483-75-0, Entry# 24889  
1-Isopropyl-4,7-dimethyl-1,2,4a,5,6,8a-hexahydronaphthalene #

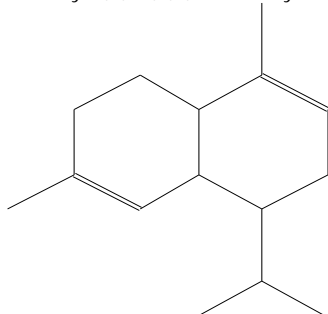

SI 932, RSI 945, replib, Entry# 24843, CAS# 30021-74-0, ç-Muurolene

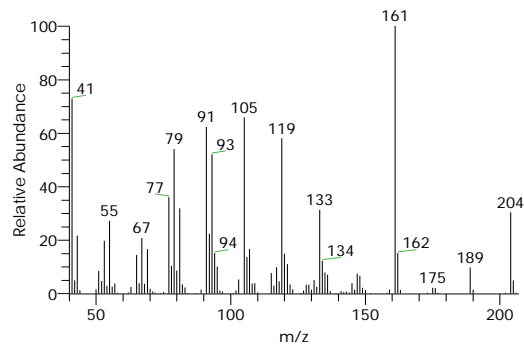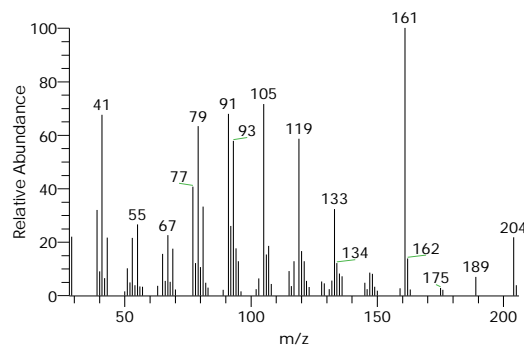

# My GC-MS Report

Compound Structure

Hit Spectrum

ç-Muurolene

Formula C<sub>15</sub>H<sub>24</sub>, MW 204, CAS# 30021-74-0, Entry# 24906

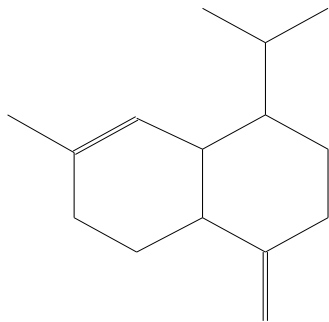

SI 917, RSI 926, replib, Entry# 24906, CAS# 30021-74-0, ç-Muurolene

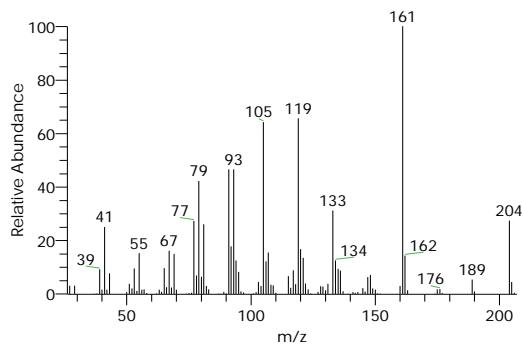

Formula C<sub>15</sub>H<sub>24</sub>, MW 204, CAS# 39029-41-9, Entry# 24895

ç-Cadinene

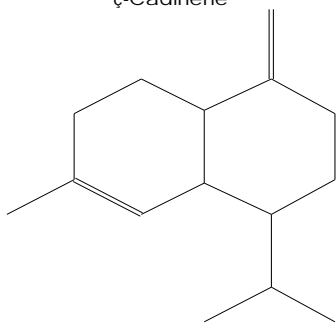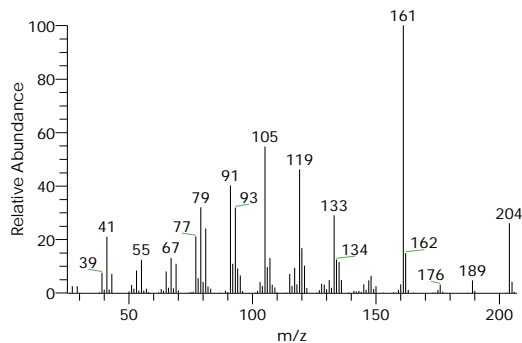

(1S,4aR,8aS)-1-Isopropyl-7-methyl-4-methylene-1,2,3,4,4a,5,6,8a-octahydronaphthalene

Formula C<sub>15</sub>H<sub>24</sub>, MW 204, CAS# 6980-46-7, Entry# 150501

ç-Amorphene

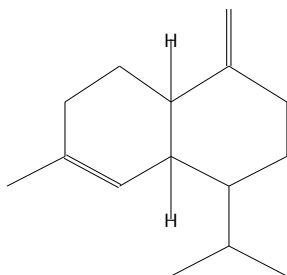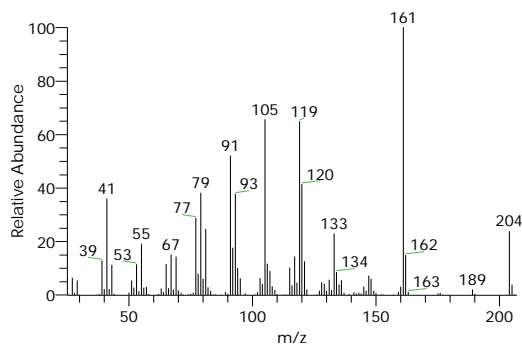

Rosemary\_Oil #2680 RT: 12.98 AV: 1 NL: 3.94E6  
T: + c EI Full ms [50.000-750.000]

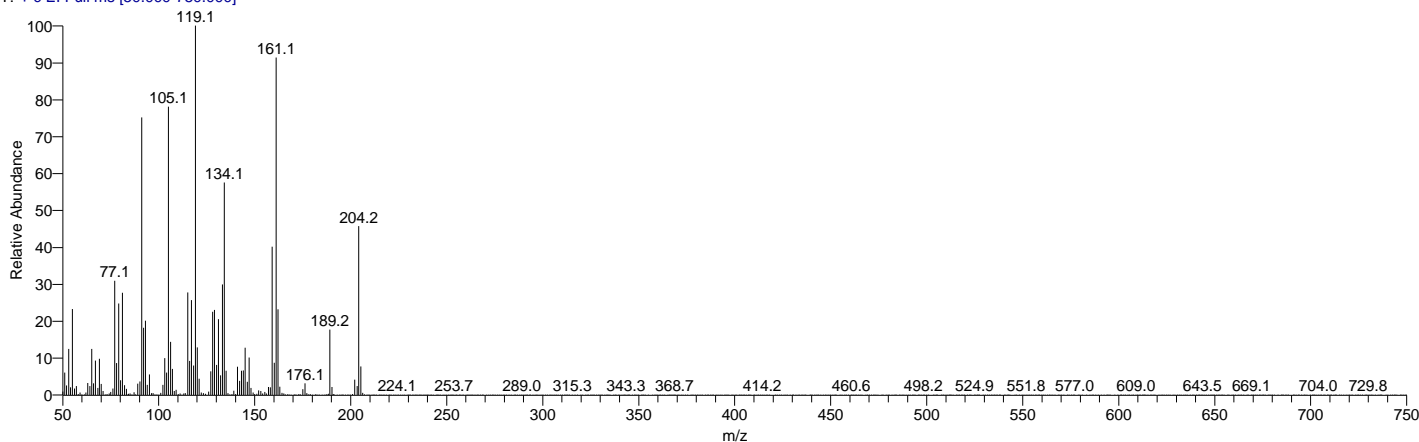

| RT    | Compound Name                                                                            | Area % | MF  | Molecular Formula               | Molecular Weight | Cas #        | Library             |
|-------|------------------------------------------------------------------------------------------|--------|-----|---------------------------------|------------------|--------------|---------------------|
| 12.98 | NAPHTHALENE,<br>1,2,3,5,6,8A-HEXAHYDRO-4,7-DI<br>METHYL-1-(1-METHYLETHYL)-,<br>(1S-CIS)- | 0.39   | 928 | C <sub>15</sub> H <sub>24</sub> | 204              | 483-76<br>-1 | WileyRegi<br>stry8e |



# My GC-MS Report

| RT    | Compound Name                                                                            | Area % | MF  | Molecular Formula | Molecular Weight | Cas #      | Library             |
|-------|------------------------------------------------------------------------------------------|--------|-----|-------------------|------------------|------------|---------------------|
| 12.98 | Naphthalene,<br>1,2,3,5,6,8a-hexahydro-4,7-dimethyl-<br>1-(1-methylethyl)-, (1S-cis)-    | 0.39   | 911 | C15H24            | 204              | 483-76-1   | replib              |
| 12.98 | 1-Isopropyl-4,7-dimethyl-1,2,3,5,6,8a-<br>-hexahydronaphthalene                          | 0.39   | 913 | C15H24            | 204              | 16729-01-4 | mainlib             |
| 12.98 | NAPHTHALENE,<br>1,2,3,5,6,8A-HEXAHYDRO-4,7-DI<br>METHYL-1-(1-METHYLETHYL)-,<br>(1S-CIS)- | 0.39   | 873 | C15H24            | 204              | 483-76-1   | WileyRegi<br>stry8e |
| 12.98 | NAPHTHALENE,<br>1,2,3,5,6,8A-HEXAHYDRO-4,7-DI<br>METHYL-1-(1-METHYLETHYL)-,<br>(1S-CIS)- | 0.39   | 863 | C15H24            | 204              | 483-76-1   | WileyRegi<br>stry8e |

## Compound Structure

## Hit Spectrum

NAPHTHALENE, 1,2,3,5,6,8A-HEXAHYDRO-4,7-DIMETHYL-1-(1-METHYLETHYL)-, (1S-CIS)-  
Formula C15H24, MW 204, CAS# 483-76-1, Entry# 89277  
1-ISOPROPYL-4,7-DIMETHYL-1,2,3,5,6,8A-HEXAHYDRONAPHTHALENE #

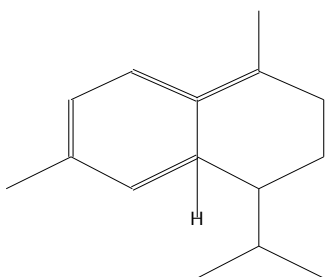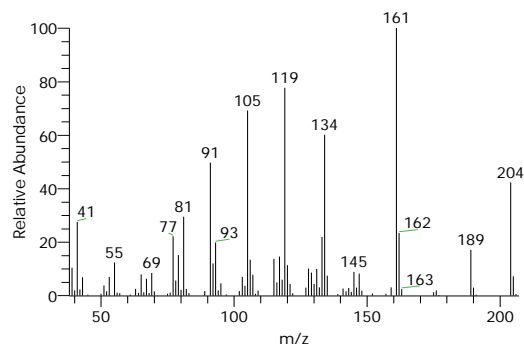

Naphthalene, 1,2,3,5,6,8a-hexahydro-4,7-dimethyl-1-(1-methylethyl)-, (1S-cis)-  
Formula C15H24, MW 204, CAS# 483-76-1, Entry# 24907  
Cadina-1(10),4-diene

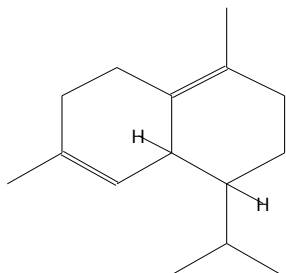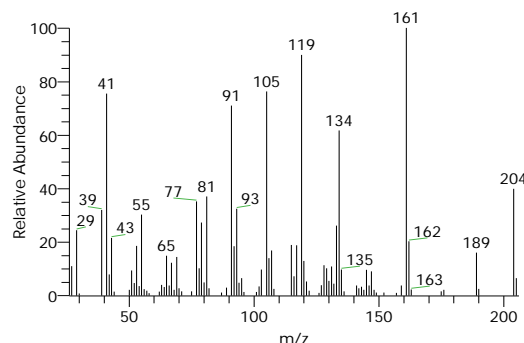

1-Isopropyl-4,7-dimethyl-1,2,3,5,6,8a-hexahydronaphthalene  
Formula C15H24, MW 204, CAS# 16729-01-4, Entry# 150583  
Cadina-1(10),4-diene

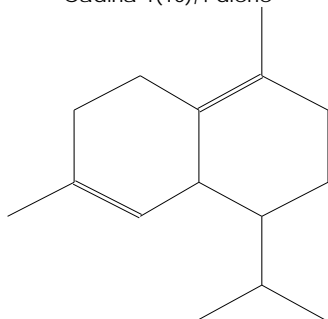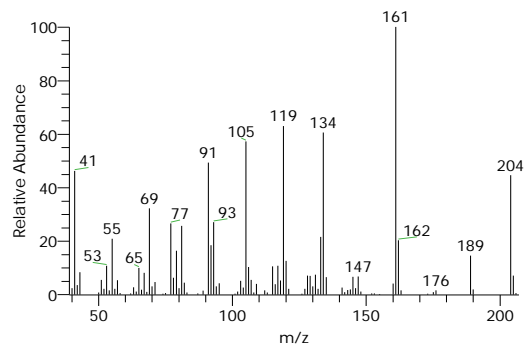

# My GC-MS Report

Compound Structure

Hit Spectrum

NAPHTHALENE, 1,2,3,5,6,8A-HEXAHYDRO-4,7-DIMETHYL-1-(1-METHYLETHYL)-, (1S-CIS)-

Formula C<sub>15</sub>H<sub>24</sub>, MW 204, CAS# 483-76-1, Entry# 89273

1-ISOPROPYL-4,7-DIMETHYL-1,2,3,5,6,8A-HEXAHYDRONAPHTHALENE #

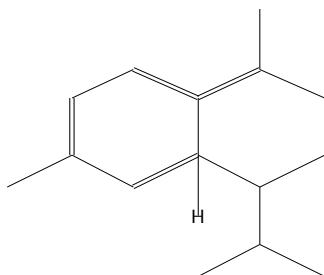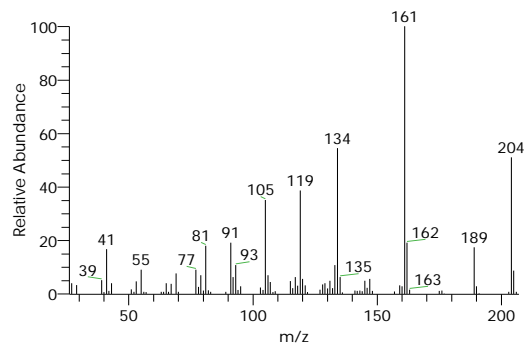

NAPHTHALENE, 1,2,3,5,6,8A-HEXAHYDRO-4,7-DIMETHYL-1-(1-METHYLETHYL)-, (1S-CIS)-

Formula C<sub>15</sub>H<sub>24</sub>, MW 204, CAS# 483-76-1, Entry# 89275

1-ISOPROPYL-4,7-DIMETHYL-1,2,3,5,6,8A-HEXAHYDRONAPHTHALENE #

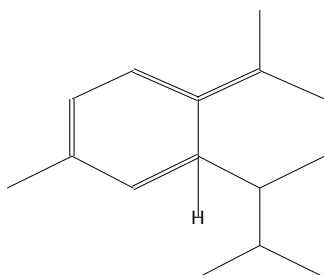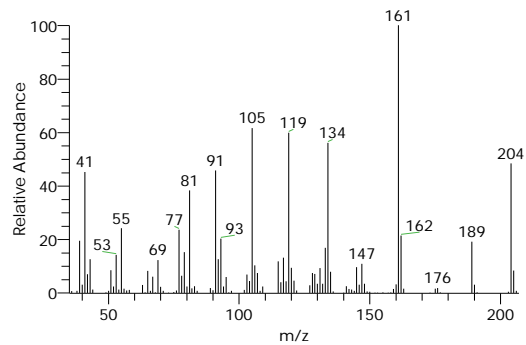

Supplement: mmc3.pdf [file mmc3.pdf]
