# Supplementary material for: Larvicidal and adulticidal activity of essential oils from plants of the Lamiaceae family against the West Nile virus vector, Culex pipiens (Diptera: Culicidae)
Source: PubMed Central journal article supplement (PMC9232543; doi:10.1016/j.sjbs.2022.103350), 2022-06-16
Supplement: mmc4.pdf [file mmc4.pdf]

# Larvicidal and Adulticidal Activity of Essential Oils from Plants of the Lamiaceae Family against the West Nile Virus Vector, *Culex pipiens* (Diptera: Culicidae)

*By Hanan Bosly*

# Larvicidal and Adulticidal Activity of Essential Oils from Plants of the

## Lamiaceae Family against the West Nile Virus Vector, *Culex pipiens*

### (Diptera: Culicidae)

#### 4 Abstract

5 *Culex pipiens* mosquitoes are the most widely distributed primary vector of the West Nile virus  
6 worldwide. Many attempts for investigation of botanical pesticides to avoid the development of  
7 pesticide resistance to conventional synthetic pesticides that are recognized as a threat to the  
8 diversity of ecosystems. The study aimed to determine the components of three essential oils of  
9 Lamiaceae family, lavender (*Lavandula angustifolia*), peppermint (*Mentha piperita* L.), and  
10 rosemary (*Rosmarinus officinalis* L.) by gas chromatography-mass spectrometry (GC-MS)  
11 analysis. Furthermore, aimed to validate the insecticidal activities of these oils as larvicidal agents  
12 against the third instar larvae of *Culex pipiens* using five different concentrations (62.5, 125, 250,  
13 500, and 1000 ppm) for each oil in five replicates and as an adulticidal agent against approximately  
14 three day-old female adults of *Cx. pipiens* using 0.5, 1, 2, 4, and 5% concentrations in three  
15 replicates. The results generally showed a dose-related response. At 1000 ppm, rosemary oil  
16 showed the highest larvicidal (100%) (LC<sub>50</sub>, 214.97 ppm), followed by peppermint oil (92.00%  
17 mortality and LC<sub>50</sub> (269.35 ppm). Lavender oil showed the lowest efficacy with 87.20% mortality  
18 and LC<sub>50</sub> (301.11 ppm). At 5% oil concentration, the highest knockdown rate at 1 h was recorded  
19 for lavender oil (95.55%), followed by peppermint oil (88.89%) and lastly rosemary oil (84.44%).  
20 After 24 h, rosemary oil showed the lowest adult mortality rate (88.89%; LC<sub>50</sub>, 1.44%), while  
21 lavender and peppermint oils both showed a 100% mortality rate, with (LC<sub>50</sub>, 0.81% and 0.91%,  
22 respectively). The chemical constituents of the oils consisted of monoterpenes and sesquiterpenes  
23 that determined their insecticidal activities against the target insect stage. The study proposed that  
24 rosemary essential oil may be useful for the control of *Cx. pipiens* larvae as part of an integrated  
25 water treatment strategy, and lavender and peppermint oils may be used in an integrated plan for  
26 adult's control.

27 **Keywords:** Lavender, Peppermint, Rosemary, Essential Oils, *Culex pipiens*, Insecticidal.

28

#### 29 1. Introduction

30 The Lamiaceae family called the mint family is characterized by economically important species  
31 of aromatic plants including 250 genera and 7825 species (Prakash et al., 2016). Their essential  
32 oils are obtained from different aerial parts (seeds, leaves, flowers, shoots, and fruits) or roots.  
33 These oils contain characteristic functional groups such as aldehydes, esters, phenols, ketones,  
34 alcohols, organic acids, hydrocarbons and terpenoids Essential oils may be preferred in the  
35 industrial economic sector due to the development of fewer toxic side products and economic  
36 viability (Nazar et al., 2022; Ramos da Silva et al., 2021).

37 The present study investigated three essential oils from three genera of the family Lamiaceae. The  
38 first was lavender oil from the flowering parts of *Lavandula angustifolia* L. This species showed  
39 anti-inflammatory, antibacterial, antiviral, and antifungal properties and anticancer activity as well  
40 as to provide mood disturbance relief (Cavanagh and Wilkinson, 2002; Denner, 2009; Rai et al.,  
41 2020). The second was peppermint oil from the aerial parts of *Mentha x piperita* L. which is a  
42 hybrid mint (*M. aquatica* × *M. spicata*). Peppermint oil is used in the health industry because of  
43 its wide spectrum of therapeutic properties. These include analgesic, antispasmodic, and  
44 antiemetic action, abdominal pain relief, antioxidant activity, and cytotoxicity against bacteria and  
45 fungi as well as insecticidal effects against many pests (da Silva Ramos et al., 2017; Kalemba and  
46 Synowiec, 2019; Mahendran and Rahman, 2020). The third was rosemary oil from the flowering  
47 tops of the plant *Rosmarinus officinalis* L. which has been shown to have anti-inflammatory  
48 properties with potential applications in inflammatory-related diseases. Furthermore, it exerts anti-  
49 depressive, antimicrobial, antioxidant, antiallergic, and smooth muscle relaxant effects, as well as  
50 shows antifungal, antimutagenic, and insecticidal activities (Borges et al., 2019; De Oliveira et al.,  
51 2019; Isman et al., 2008; Krzyżowski et al., 2020).

52 *Culex pipiens* is commonly known house mosquito and one of the most widely distributed  
53 mosquitoes worldwide and several studies reported the involvement of *Cx. pipiens* in transmission  
54 of the West Nile virus (Al-Mekhlafi et al., 2018; El-Akhal et al., 2015). A previous study suggested  
55 that control efforts focused on *Cx. pipiens* alone may greatly reduce both human exposure,  
56 infection, and epidemic distribution (Hamer et al., 2008). The research interest for botanical  
57 pesticides containing natural compounds as active ingredients, from which essential oils are  
58 considered a part. Where the use of these compounds attempts to avoid the development of  
59 pesticide resistance to conventional synthetic pesticides that are also now recognized as a threat to  
60 the diversity of ecosystems (Ahmed et al., 2021).

61 The present study aimed to evaluate the adulticidal and larvicidal potential of lavender,  
62 peppermint, and rosemary oils against the common house mosquito, *Cx. pipiens*. Furthermore, we  
63 aimed to determine the oils compounds by gas chromatography-mass spectrometry (GC-MS)  
64 analysis.

## 65 2. Material and Methods

### 66 2.1. Mosquito colony rearing and experimental conditions

67 Mosquitoes (*Cx. pipiens*) were reared for several generations at Center for Environmental  
68 Research and Studies at Jazan University. Rearing was performed under controlled conditions (27  
69  $\pm 2$  °C, relative humidity at 70%  $\pm$  10%, and 12:12 h light:dark regime). Adult mosquitoes were  
70 reared in wooden cages and supplied daily by 10% sucrose solution soaked in sponge pieces for  
71 3–4 days post emergence. Then, females were supplied pigeon blood meal. Plastic oviposition  
72 cups contained tap water (without chlorine) were placed in the cages. The resulting egg mass were  
73 transferred into plastic pans containing 3 L of tap water for 24 h. The hatching larvae were provided  
74 with a diet of fish food daily. The third instar *Cx. pipiens* larvae were used for the larvicidal  
75 examination, and the adults used for the adulticidal examination were glucose-fed female  
76 mosquitoes reared under the aforementioned controlled conditions.

### 77 2.2. Essential oils

78 Lavender essential oil, steam-distilled from flowering tops of *L. angustifolia*, (Lamiales:  
79 Lamiaceae; Case No. 8000-28-0), Peppermint essential oil, steam-distilled from the aerial parts of  
80 *M. piperita* L. (Lamiales: Lamiaceae; Case No. 8006-90-4), and Rosemary essential oil, steam-  
81 distilled from the tops of *R. officinalis* L. (Lamiales: Lamiaceae; Case No. 8000-25-7) were  
82 purchased from NOW Foods company (Natural Organic and Wholesome Foods), a distributor in  
83 Jeddah, Kingdom of Saudi Arabia.

### 84 2.3. Identification of the chemical composition using gas chromatography-mass 85 spectrometer

86 The investigation of the chemical composition of the essential oils was performed by GC-MS using  
87 the Trace GC-TSQ mass spectrometer (Thermo Fisher Scientific, Waltham, MA, USA) with a  
88 direct capillary column, TG-5MS (30 m  $\times$  0.25 mm  $\times$  0.25  $\mu$ m thickness of the film). The operating  
89 conditions of the GC were column oven temperature initially maintained at 50 °C, then elevated  
90 at a rate of 5 °C/min up to 250 °C, maintained for 2 min, then elevated at a rate of 30 °C/min to  
91 300 °C. The MS transfer line and the injector were adjusted at 270 °C and 260 °C, respectively,

92 and helium was the carrier gas at rate, 1 mL/min. The solvent retention time was 4 min, and 1 µL  
93 of the diluted samples was automatically injected using an AS1300 autosampler and GC split  
94 mode. In full scanning mode, electrospray ionization (EI) mass spectra were in range 50–650 m/s  
95 at an ionization voltage of 70 V. The temperature of the ion source was fixed at 200 °C. The mass  
96 spectra of the components then compared with those in the mass spectral libraries from the NIST  
97 14 and WILEY 09 databases, the selected constituents were identified from the Total Ion  
98 Chromatogram (TIC).

### 99 **2.3. Larvicidal assay**

100 The larvicidal activity was determined for the lavender, peppermint, and rosemary oils against *Cx.*  
101 *pipiens* third instar larvae according to guidelines of the World Health Organization (WHO, 2005).  
102 The solution of each oil was set as stock by mixing 1 mL oil with distilled water containing 0.2  
103 mL Tween-20. Subsequently, five different concentrations were prepared, (62.5, 125, 250, 500,  
104 and 1000 ppm) based on v/v percent of 1% of stock solution. Twenty-five *Cx. pipiens* larvae were  
105 offered to each oil in 250 mL glass beakers containing 150 mL water at the aforementioned  
106 controlled conditions. Five replicates per concentration per oil and control were conducted. The  
107 larval mortalities were detected after 24 h for estimation of larval lethal concentration (LC<sub>50</sub>) by  
108 probit analysis.

### 109 **2.4. Adulticidal assay**

110 The adulticidal activity for the oils was analyzed by the adapted CDC bottle protocol (Ilahi et al.,  
111 2021; WHO, 2016). Five different concentrations from each oil dissolved in ethanol were prepared  
112 (0.5, 1, 2, 4, and 5%). Each prepared concentration for every oil was used to coat the CDC bottles  
113 (250 mL Wheaton bottles with screw lids) similarly to the control bottle, which was coated with  
114 only ethanol. The solvent was evaporated from the bottles for 1 h at 27 ± 2 °C. Three replicates  
115 per concentration per oil and the control were conducted. Adult glucose-fed female mosquitoes (n  
116 = 15) aged 3–4 d were selected using an aspirator and gently introduced to each bottle, and the  
117 bottles were closed with their lids. If a mosquito was knocked down or unable to move or stand  
118 within 60 min of exposure, it was considered as dead. The number was recorded for each bottle  
119 after 5, 10, 20, 30 and 60 min for determination of the median knockdown time (KT<sub>50</sub>) value and  
120 KT<sub>90</sub> and KT<sub>95</sub> values of each concentration through probit analysis. Live mosquitoes were then  
121 removed from bottles after 1 h and placed in separate paper cups containing 10% sucrose solution.

122 Subsequently, the adult mortality rate was measured after 24 h within the replicates for  
123 determination of the sLC<sub>50</sub>, LC<sub>90</sub> and LC<sub>95</sub> by probit analysis.

## 124 2.5. Data analysis

125 The percentage mortalities were calculated according to Abbott's formula (Abbott, 1925). The  
126 larval control results did not need correction, as the mortality was less than 5%, according to the  
127 WHO guidelines (WHO, 2005) (no larval control mortality recorded throughout the study). The  
128 adult data were also not corrected, as the control adults had a mortality of less than 20% (WHO,  
129 2016). Data from all the replicates were statistically analyzed to determine the larval and adult's  
130 LC<sub>50</sub>, LC<sub>90</sub>, and LC<sub>95</sub> values and the adult KT<sub>50</sub>, KT<sub>90</sub>, and KT<sub>95</sub> values as well as chi-square values  
131 within confidence limits at 95% (lower confidence limit [LCL] and upper confidence limit [UCL])  
132 by probit analysis using regression between log oil concentration and probit values. Mortality data  
133 were subjected to one-way analysis of variance (ANOVA) (with a least significant difference  
134 (LSD) test). Data analysis was performed using SPSS software (IBM SPSS Statistics v22 – 64 bit),  
135 and p < 0.05 was considered significant.

## 136 3. Results

### 137 3.1. Chemical analysis

138 The GC-MS analysis represented that the main compounds of the three essential oils were the  
139 monoterpenoids and sesquiterpenes (Table 4; Figure 4). In lavender (*L. angustifolia*) essential oil,  
140 the main represented area% were for monoterpenoids, linalool (23.75%), linalyl anthranilate  
141 (21.92%), lavandulyl acetate (11.85%), 4-terpineol (8.90%), and linalyl acetate (6.66%), followed  
142 by geranyl acetate (2.99%), L- $\alpha$ -terpineol (0.70%), and bornyl acetate (0.10%). The  
143 sesquiterpenoids were  $\beta$ -caryophyllene (16.35%), (E)- $\beta$ -farnesene (14.09%), germacrene D  
144 (1.29%), caryophyllene oxide (0.77%),  $\gamma$ -muurolene (0.35%), and transe- $\alpha$ -bergamotene (0.26%).  
145 In peppermint (*M. piperita* L.) oil, the main represented monoterpenoids were menthyl acetate  
146 (32.76%), L-menthol (26.41%), and L-menthone (13.57%), followed by pulegone (1.94%), L-  
147 alpha-terpineol (1.63%), and piperitone (1.32%). The main sesquiterpenoid was  $\beta$ -caryophyllene  
148 (18.48%), followed by humulene (1.41%), germacrene D (0.88%),  $\beta$ -bourbonene (0.58%),  
149 elemene isomer (0.46%), and alloaromadendrene (0.34%). In Rosemary (*R. officinalis* L.) essential  
150 oil, the chemical compounds were represented by camphor (56.55%) as the major monoterpenoid,  
151 followed by isoborneol (7.16%),  $\alpha$ -terpineol (5.40%), and bornyl acetate (3.69%), and the main

152 sesquiterpenoid was  $\beta$ -caryophyllene (23.0%), followed by humulene (3.20%), cadina-1(10),4-  
153 diene (0.39%),  $\alpha$ -copaene (0.34%), and  $\gamma$ -muurolene (0.26%).

### 154 **3.2. Larvicidal activity**

155 The data on the larvicidal activity of the tested essential oils against the third instar larvae of *Cx.*  
156 *pipiens* are represented in Table 1. The probit regression responses of the essential oils tested  
157 revealed that the larvicidal activities after 24 h ranged from 87.20 to 100% mortality at 1000 ppm.  
158 Rosemary essential oil showed the highest efficacy by inducing 100% mortality (LC<sub>50</sub>, 214.97,  
159 LC<sub>90</sub>, 671.77, and LC<sub>95</sub>, 927.90 ppm), followed by peppermint oil by 92.00% mortality (LC<sub>50</sub>,  
160 269.35, LC<sub>90</sub>, 1137.74, and LC<sub>95</sub>, 1711.70 ppm). Lavender oil was the least effective, inducing  
161 87.20% mortality (LC<sub>50</sub>, 301.11, LC<sub>90</sub>, 1437.63, and LC<sub>95</sub>, 2239.31 ppm) (Figure 1).

### 162 **3.3 Adulticidal activity**

163 The effect of the test concentrations of the three essentials oils on *Cx. pipiens* females were  
164 evaluated after 60 min of exposure in terms of LC<sub>50</sub>, which is shown in Figure 2, KT<sub>50</sub>, KT<sub>90</sub>, and  
165 KT<sub>95</sub>, which are listed in Table 2. According to the analysis, the highest knockdown rate was  
166 recorded for lavender oil (95.55%) followed by that for peppermint oil (88.89%) and lastly  
167 rosemary oil (84.44%) at the highest tested concentration of the oils (5%).

168 When considering knockdown times, data revealed that at a concentration of 5%, the knockdown  
169 times were the lowest for lavender oil compared with those recorded for the other two oils.  
170 Lavender oil had a KT<sub>50</sub> of 17.43 min, KT<sub>90</sub> of 57.51 min, and KT<sub>95</sub> of 80.68 min. Peppermint oil  
171 showed a KT<sub>50</sub> of 22.81 min, KT<sub>90</sub> of 95.54 min, and KT<sub>95</sub> of 143.40 min. Furthermore, rosemary  
172 oil revealed a KT<sub>50</sub> of 26.64 min, KT<sub>90</sub> of 102.56 min, and KT<sub>95</sub> of 150.29 min.

173 Adult toxicity of the three tested oils after 24 h was also assessed (Table 3), and probit regression  
174 results are shown in Figure 3. Data showed contrary results to those observed for the larvicidal  
175 activity of the tested oils. Here, rosemary essential oil showed the least adulticidal efficiency  
176 (88.89% mortality rate) and an LC<sub>50</sub> of 1.44% after 24 h at the highest tested concentration (5%).  
177 Lavender and peppermint oils at 5% concentration both showed a mortality rate of 100%, with an  
178 LC<sub>50</sub> of 0.81% and 0.91%, respectively, after 24 h. It was noted that the lowest median adulticidal  
179 concentration was that of lavender oil which was in line with knockdown assay results.

180

## 181 **4. Discussion**

182 <sup>3</sup> The present study tested the larvicidal and adulticidal efficacy of lavender, peppermint, and  
183 rosemary essential oils against *Cx. pipiens* mosquitos. These effects were expected owing to the  
184 active constituents of these oils. The major components present in lavender essential oil as  
185 determined by GC-MS in this study corresponded with the findings of previous studies (El-Akhal  
186 et al., 2021; Karamaouna et al., 2013), as did the components present in the peppermint essential  
187 oil (Ebadollahi et al., 2017; Mackled et al., 2019; Samarasekera et al., 2008) and the rosemary  
188 essential oil (Jafari-sales and Pashazadeh, 2020; Zeghib et al., 2020). Generally, the tested three  
189 essential oils recorded chemical constituents and their insecticidal activities in accordance with the  
190 methods of several previous studies reviewed by Ebadollahi et al (2020).

191 The study was coverage <sup>15</sup> the larvicidal activity of the tested oils against the third instar larvae of  
192 *Cx. Pipiens*. The study evaluated the concentration-related mortalities for each of the oils, and  
193 graded the mortalities at the highest used concentration (1000 ppm), where rosemary oil acquired  
194 the most potent larvicidal activity (100% mortality) followed by peppermint oil (92%) and lastly  
195 lavender oil (87%).

196 In line with the present results about larvicidal LC<sub>50</sub> value, Radwan et al. (2008), recorded an LC<sub>50</sub>  
197 of 216.10 ppm for rosemary essential oil and a lower larvicidal efficacy of peppermint oil (>500  
198 ppm) against *Cx. pipiens*. The study presented that the saturated monoterpenoid alcohol menthol,  
199 which is the major component in peppermint oil, exhibited lower larvicidal activity against *Cx.*  
200 *pipiens*. Zeghib et al. (2020) evaluated larvicidal activity against the fourth instar larvae of *Cx.*  
201 *pipiens* of rosemary essential oil extracted from the aerial parts of *R. officinalis*. They recorded  
202 100% mortality at 99.34 ppm of the oil concentration and evaluated camphor as one of the major  
203 components. A further component that had a role in toxicity was β-caryophyllene, which was the  
204 second most abundant component detected in rosemary oil (23%) and the third most abundant in  
205 lavender (16.35%) and peppermint oils (18.48%) and displayed effective larvicidal activity as an  
206 individual compound against *Anopheles subpictus*, *Aedes albopictus*, and *Cx. tritaeniorhynchus*  
207 (Govindarajan et al., 2016). A sesquiterpene compound, α-humulene, was present in a higher  
208 percentage in rosemary oil (3.20%) than in peppermint oil (1.41%) and not detected in lavender  
209 oil. This compound exhibited larvicidal activity at low dosages against *A. subpictus*, *Ae.*  
210 *albopictus*, and *Cx. tritaeniorhynchus* third instar larvae (Govindarajan and Benelli, 2016).  
211 Linalool, the main constituent in lavender oil, had larvicidal activity against third instar larvae of  
212 *Ae. aegypti*, and morphological alterations detected in larvae exposed to sublethal doses of linalool



213 included abdomen elongation and curving and gut content partial extrusion involving the  
214 peritrophic matrix (Fujiwara et al., 2017). Essential oil extracted from *M. piperita* leaves  
215 exhibited larvicidal and repellent efficacy against the early fourth instar larvae of *Ae. aegypti*  
216 (Kumar et al., 2011). Another study showed toxicity effects of peppermint and lavender essential  
217 oils against *M. domestica* larvae in conjunction with larval morphological abnormalities (Bosly,  
218 2013). Moreover, studies reported that minor compounds found such as bornyl acetate (present in  
219 rosemary oil) exhibited strong larvicidal activity against *Cx. pipiens* larvae (Zeghib et al., 2020).  
220 Other compounds present in high concentrations, similarly to our study, such as linalool and  
221 terpineol (in lavender oil) and menthone (in peppermint oil) individually exhibited low larvicidal  
222 activities with recorded LD<sub>50</sub> of 193,194, and 156 mg/L, respectively, against *Cx. pipiens* larvae  
223 (Radwan et al., 2008; Traboulsi et al., 2002).  
224 Contrary to the larvicidal results obtained in this study, lavender, peppermint, and rosemary  
225 essential oils at 1000 ppm concentration resulted in larval mortality of 68, 100 and 80%,  
226 respectively, after 24 h against *Cx. quinquefasciatus*, revealing the potent larvicidal effect of  
227 peppermint oil (Manimaran et al., 2012). El-Akhal et al (2021) showed that lavender oil at 800  
228 ppm resulted in 100% larval mortality with an LC<sub>50</sub> of 140 ppm against *Cx. pipiens* larvae. Zhu  
229 and Tian (2013) tested the larvicidal activities of camphor, eucalyptol, terpine-4-ol, germacrene  
230 D, caryophyllene oxide, and caryophyllene against *A. anthropophagus* and found that the most  
231 potent were caryophyllene oxide and germacrene D, followed by terpine-4-ol and camphor, and  
232 the least potent was caryophyllene. In addition, Dias and Moraes (2014) reported that majority of  
233 essential oils showed potent larvicidal activity derived from species of particular families, such as  
234 Lamiaceae that are rich in sesquiterpenes and monoterpene hydrocarbons, and their individual  
235 pure compounds showed against mosquito larvae high activity.  
236 Herein, the tested plant oils are not toxic to vertebrates and identified to be eco-friendly as well as  
237 used as medicinal plants. However their varied related toxicity potential with insect stage.  
238 Rosemary oil displayed the strongest larvicidal activity, while lavender and peppermint oils  
239 exhibited the strongest adulticidal activity. The adulticidal and knockdown activities of the tested  
240 oils recorded 100% mortalities for lavender and peppermint oils with KT<sub>50</sub> of 17.43 and 22.81 min,  
241 respectively, while rosemary oil showed only 88.89% mortality with a KT<sub>50</sub> of 26.64 min.  
242 Structural variations of peppermint constituents, menthol, menthyl acetate, menthone,  $\alpha$ -terpineol,  
243 pulegone, and  $\beta$ -caryophyllene, which were previously shown to be adulticidal and have

244 knockdown efficacy against 3-day-old females of *Cx. Quinquefasciatus*, could contribute towards  
245 retaining or enhancing the oil mosquitocidal activity (Samarasekera et al., 2008). Pulegone was  
246 the most effective adulticidal among different tested terpenes with LC<sub>50</sub> values lower than 0.1  
247 mg/L against *Ae. aegypti* adults (Flores Guillermo et al., 2020). Linalool had an LC<sub>50</sub> value of  
248 14.87 µg/mL against adult *Cx. pipiens* mosquitoes (Tabari et al., 2017). Additionally, the repellent  
249 properties of peppermint essential oil were established against adults *Ae. aegypti* (Kumar et al.,  
250 2011; Manh and Tuyet, 2020). Effective repellent activity was also evaluated for lavender and  
251 rosemary essential oils against adult mosquitoes of *Cx. pipiens pallens* (Choi et al., 2002).  
252 The toxicity for rosemary essential oil towards adults of *Cx. pipiens* was previously evaluated and  
253 proposed be attributed to its major monoterpenes constituents and recorded strong fumigant  
254 toxicity against adults, meanwhile, showed weak toxicity against larvae (Zahran et al., 2017).  
255 The study confirmed the oil constituent's role in toxicity, where interaction between the oil  
256 constituents is very important for the development of its insecticidal formulation and adjustment  
257 of the content active substances for formulation to ensure the biological efficacy as previously  
258 confirmed (Pavela, 2015; Sharma et al., 2022).

## 259 5. Conclusion

260 The present study revealed that rosemary oil acquired the most potent larvicidal activity (100%  
261 mortality) followed by peppermint oil (92%) and lastly lavender oil (87%). The adulticidal and  
262 knockdown activities of the tested oils recorded 100% mortalities for lavender and peppermint oils  
263 with KT<sub>50</sub> of 17.43 and 22.81 min, respectively, while rosemary oil showed only 88.89% mortality  
264 with a KT<sub>50</sub> of 26.64 min. The present study suggests that the synergistic effect of compounds  
265 present in each essential oil may elevate its biological activity against the target insect stage and  
266 proposed rosemary essential oil may be useful for control of *Cx. pipiens* larvae as a water treatment  
267 product and lavender and peppermint for application in control of adult mosquitoes.

268  
269 **Acknowledgements:** The author wish to appreciate the Center for Environmental Research and  
270 Studies at Jazan University for the technical support.

271 **Conflict of interest:** The author declare that she has no competing interests

## 272 Table ligands and Figures captions

273 **Table 1. The larvicidal effects of essential oils against the third instar larvae of *Culex pipiens***  
274 **at 24 h post-treatment.**

275 **Table 2.** Probit analysis of knockdown time and mortality rates of *Culex pipiens* females after  
276 oil exposure for 60 min.

277 **Table 3.** The adulticidal effects of essential oils against female adults of *Culex pipiens* at 24 h  
278 post-treatment.

279 **Table 4.** Chemical constituents of lavender, peppermint and rosemary essential oils.

280 **Figure 1.** Probit regression responses of lavender, peppermint and rosemary essential oils against  
281 *Culex pipiens* larval mortality.

282 **Figure 2.** Knockdown rate (mortality %) of lavender, peppermint and rosemary essential oils  
283 against *Culex pipiens* female adults. Significant differences at 0.05 level between  
284 different superscript letters to means of the same oil.

285 **Figure 3.** Probit regression responses of lavender, peppermint and rosemary essential oils against  
286 *Culex pipiens* adult mortality.

287 **Figure 4.** The TIC chromatograms of lavender, peppermint and rosemary essential oils chemical  
288 constituents detected by GC–MS.

289

## 290 References

291 Abbott, W.S., 1925. A method of computing the effectiveness of an insecticide. J. econ. Entomol  
292 18(2), 265–267. <https://doi.org/10.1093/jee/18.2.265a>

293 Ahmed, N., Alam, M., Saeed, M., Ullah, H., Iqbal, T., Al-Mutairi, K.A., Shahjeer, K., Ullah, R.,  
294 Ahmed, S., Ahmed, N.A.A.H., Khater, H.F., Salman, M., 2021. Botanical Insecticides  
295 Are a Non-Toxic Alternative to Conventional Pesticides in the Control of Insects and  
296 Pests, in: Global Decline of Insects. IntechOpen.  
297 <https://doi.org/10.5772/intechopen.100416>

298 Al-Mekhlafi, F.A., Abutaha, N., Farooq, M., Al-Wadaan, M., 2018. Insecticidal effect of  
299 Solenostemma argel extracts against *Culex pipiens*. J. Am. Mosq. Control Assoc. 34(3),  
300 217–223. <https://doi.org/10.2987/17-6725.1>

301 Borges, R.S., Ortiz, B.L.S., Pereira, A.C.M., Keita, H., Carvalho, J.C.T., 2019. Rosmarinus  
302 officinalis essential oil: A review of its phytochemistry, anti-inflammatory activity, and  
303 mechanisms of action involved. J. Ethnopharmacol. 229, 29–45.  
304 <https://doi.org/10.1016/j.jep.2018.09.038>

305 Bosly, A.H., 2013. Evaluation of insecticidal activities of *Mentha piperita* and *Lavandula*  
306 *angustifolia* essential oils against house fly, *Musca domestica* L.(Diptera: Muscidae). J.  
307 Entomol. Nematol. 5(4), 50–54. <https://doi.org/10.5897/jen2013.0073>

308 Cavanagh, H.M.A., Wilkinson, J.M., 2002. Biological activities of lavender essential oil. Phyther.  
309 Res. 16(4), 301–308. <https://doi.org/10.1002/ptr.1103>

310 Choi, W.-S., Park, B.-S., Ku, S.-K., Lee, S.-E., 2002. Repellent activities of essential oils and  
311 monoterpenes against *Culex pipiens pallens*. J. Am. Mosq. Control Assoc. 18(4), 348–  
312 351. . <https://doi.org/10.1016/j.fitote.2006.05.028>

313 da Silva Ramos, R., Rodrigues, A.B.L., Farias, A.L.F., Simões, R.C., Pinheiro, M.T., Ferreira,  
314 R.M. dos A., Costa Barbosa, L.M., Picanço Souto, R.N., Fernandes, J.B., Santos, L. da  
315 S., 2017. Chemical composition and in vitro antioxidant, cytotoxic, antimicrobial, and  
316 larvicidal activities of the essential oil of *Mentha piperita* L.(Lamiaceae). Sci. World J.  
317 2017. <https://doi.org/10.1155/2017/4927214>

318 De Oliveira, J.R., Camargo, S.E.A., De Oliveira, L.D., 2019. *Rosmarinus officinalis* L.(rosemary)  
319 as therapeutic and prophylactic agent. J. Biomed. Sci. 26, 1–22.  
320 <https://doi.org/10.1186/s12929-019-0499-8>

321 Denner, S.S., 2009. *Lavandula angustifolia* miller: english lavender. Holist. Nurs. Pract. 23(1), 57–  
322 64. . <https://doi.org/10.1097/01.HNP.0000343210.56710.fc>

323 Dias, C.N., Moraes, D.F.C., 2014. Essential oils and their compounds as *Aedes aegypti* L.(Diptera:  
324 Culicidae) larvicides. Parasitol. Res. 113, 565–592. [https://doi.org/10.1007/s00436-013-](https://doi.org/10.1007/s00436-013-3687-6)  
325 [3687-6](https://doi.org/10.1007/s00436-013-3687-6)

326 Ebadollahi, A., Davari, M., Razmjou, J., Naseri, B., 2017. Separate and combined effects of  
327 *Mentha piperata* and *Mentha pulegium* essential oils and a pathogenic fungus  
328 *Lecanicillium muscarium* against *Aphis gossypii* (Hemiptera: Aphididae). J. Econ.  
329 Entomol. 110(3), 1025–1030. <https://doi.org/10.1093/jee/tox065>

330 Ebadollahi, A., Ziaee, M., Palla, F., 2020. Essential oils extracted from different species of the  
331 Lamiaceae plant family as prospective bioagents against several detrimental pests.  
332 Molecules 25(7), 1556. <https://doi.org/10.3390/molecules25071556>

333 El-Akhal, F., Guemmouh, R., Ez Zoubi, Y., El Ouali Lalami, A., 2015. Larvicidal activity of  
334 *Nerium oleander* against larvae West Nile vector mosquito *Culex pipiens* (Diptera:  
335 Culicidae). J. Parasitol. Res. 2015. <https://doi.org/10.1155/2015/943060>

336 El-Akhal, F., Ramzi, A., Farah, A., Ez Zoubi, Y., Benboubker, M., Taghzouti, K., El Ouali Lalami,  
337 A., 2021. Chemical Composition and Larvicidal Activity of *Lavandula angustifolia*  
338 Subsp. *angustifolia* and *Lavandula dentata* Spp. *dentata* Essential Oils against *Culex*  
339 *pipiens* Larvae, Vector of West Nile Virus. *Psyche A J. Entomol.* 2021, 8872139.  
340 <https://doi.org/10.1155/2021/8872139>

341 Fujiwara, G.M., Annies, V., de Oliveira, C.F., Lara, R.A., Gabriel, M.M., Betim, F.C.M., Nadal,  
342 J.M., Farago, P. V., Dias, J.F.G., Miguel, O.G., Miguel, M.D., Marques, F.A., Zanin,  
343 S.M.W., 2017. Evaluation of larvicidal activity and ecotoxicity of linalool, methyl  
344 cinnamate and methyl cinnamate/linalool in combination against *Aedes aegypti*.  
345 *Ecotoxicol. Environ. Saf.* 139, 238–244.  
346 <https://doi.org/https://doi.org/10.1016/j.ecoenv.2017.01.046>

347 Govindarajan, M., Benelli, G., 2016.  $\alpha$ -Humulene and  $\beta$ -elemene from *Syzygium zeylanicum*  
348 (Myrtaceae) essential oil: highly effective and eco-friendly larvicides against *Anopheles*  
349 *subpictus*, *Aedes albopictus*, and *Culex tritaeniorhynchus* (Diptera: Culicidae). *Parasitol.*  
350 *Res.* 115, 2771–2778. <https://doi.org/10.1007/s00436-016-5025-2>

351 Govindarajan, M., Rajeswary, M., Hoti, S.L., Bhattacharyya, A., Benelli, G., 2016. Eugenol,  $\alpha$ -  
352 pinene and  $\beta$ -caryophyllene from *Plectranthus barbatus* essential oil as eco-friendly  
353 larvicides against malaria, dengue and Japanese encephalitis mosquito vectors. *Parasitol.*  
354 *Res.* 115(2), 807–815. <https://doi.org/10.1007/s00436-015-4809-0>

355 Guillermo, A.M.F., Nahuel, F., María, T.D., Andrés, M.V., Sara, M.P., 2020. Adulticidal effect of  
356 seven terpenes and a binary combination against *Aedes aegypti*. *J. Vector Borne Dis.* 57,  
357 356. <https://doi.org/10.4103/0972-9062.313975>

358 Hamer, G.L., Kitron, U.D., Brawn, J.D., Loss, S.R., Ruiz, M.O., Goldberg, T.L., Walker, E.D.,  
359 2008. *Culex pipiens* (Diptera: Culicidae): a bridge vector of West Nile virus to humans.  
360 *J. Med. Entomol.* 45(1), 125–128. [https://doi.org/10.1603/0022-  
361 2585\(2008\)45\[125:cpdcab\]2.0.co;2](https://doi.org/10.1603/0022-2585(2008)45[125:cpdcab]2.0.co;2)

362 Ilahi, I., Yousafzai, A.M., Attaullah, M., Haq, T.U., Rahim, A., Khan, W., Khan, A.A., Ullah, S.,  
363 Jan, T., Khan, M.M., 2021. Mosquitocidal activities of *Chenopodium botrys* whole plant  
364 n-hexane extract against *Culex quinquefasciatus*. *Brazilian J. Biol.* 83.  
365 <https://doi.org/10.1590/1519-6984.240842>

- 366 Isman, M.B., Wilson, J.A., Bradbury, R., 2008. Insecticidal Activities of Commercial Rosemary  
367 Oils (*Rosmarinus officinalis*) against larvae of *Pseudaletia unipuncta* and *Trichoplusia ni*  
368 in Relation to Their Chemical Compositions. *Pharm. Biol.* 46, 82–87.  
369 <https://doi.org/10.1080/13880200701734661>
- 370 Jafari-sales, A., pashazadeh, M., 2020. Study of chemical composition and antimicrobial  
371 properties of Rosemary (*Rosmarinus officinalis*) essential oil on *Staphylococcus aureus*  
372 and *Escherichia coli* in vitro. *Int. J. Life Sci. Biotechnol.* 3, 62–69.  
373 <https://doi.org/10.38001/ijlsb.693371>
- 374 Kalembe, D., Synowiec, A. 2019. Agrobiological Interactions of Essential Oils of Two Menthol  
375 Mints: *Mentha piperita* and *Mentha arvensis*. *Molecules*, 25(1), 59.  
376 <https://doi.org/10.3390/molecules25010059>
- 377 Karamaouna, F., Kimbaris, A., Michaelakis, A., Papachristos, D., Polissiou, M., Papatsakona, P.,  
378 Tsora, E., Miller, T., 2013. Insecticidal activity of plant essential oils against the vine  
379 mealybug, *Planococcus ficus*. *J. Insect Sci.* 13, 142.  
380 <https://doi.org/10.1673/031.013.14201>
- 381 Krzyżowski, M., Baran, B., Łozowski, B., Francikowski, J., 2020. The effect of *Rosmarinus*  
382 *officinalis* essential oil fumigation on biochemical, behavioral, and physiological  
383 parameters of *Callosobruchus maculatus*. *Insects* 11(6), 344.  
384 <https://doi.org/10.3390/insects11060344>
- 385 Kumar, S., Wahab, N., Warikoo, R., 2011. Bioefficacy of *Mentha piperita* essential oil against  
386 dengue fever mosquito *Aedes aegypti* L. *Asian Pac. J. Trop. Biomed.* 1, 85–88.  
387 [https://doi.org/https://doi.org/10.1016/S2221-1691\(11\)60001-4](https://doi.org/https://doi.org/10.1016/S2221-1691(11)60001-4)
- 388 Mackled, M.I., EL-Hefny, M., Bin-Jumah, M., Wahba, T.F., Allam, A.A., 2019. Assessment of  
389 the toxicity of natural oils from *Mentha piperita*, *Pinus roxburghii*, and *Rosa* spp. against  
390 three stored product insects. *Processes*. 7(11), 861. <https://doi.org/10.3390/pr7110861>
- 391 Mahendran, G., Rahman, L., 2020. Ethnomedicinal, phytochemical and pharmacological updates  
392 on Peppermint (*Mentha piperita* L.)—A review. *Phyther. Res.* 34, 2088–2139.  
393 <https://doi.org/10.1002/ptr.6664>
- 394 Manh, H. D., Tuyet, O. T. 2020. Larvicidal and Repellent Activity of *Mentha arvensis* L. Essential  
395 Oil against *Aedes aegypti*. *Insects* 11(3), 198. <https://doi.org/10.3390/insects11030198>

- 396 Manimaran, A., Cruz, M. M. J. J., Muthu, C., Vincent, S., Ignacimuthu, S., 2012. Larvicidal and  
397 knockdown effects of some essential oils against *Culex quinquefasciatus* Say, *Aedes*  
398 *aegypti* (L.) and *Anopheles stephensi* (Liston). *Adv. Biosci. Biotechnol.* 03(07), 855–862.  
399 <https://doi.org/10.4236/abb.2012.37106>
- 400 Nazar, N., Howard, C., Slater, A., Sgamma, T., 2022. Challenges in Medicinal and Aromatic Plants  
401 DNA Barcoding—Lessons from the Lamiaceae. *Plants* 11(1), 137.  
402 <https://doi.org/10.3390/plants11010137>
- 403 Pavela, R., 2015. Acute toxicity and synergistic and antagonistic effects of the aromatic  
404 compounds of some essential oils against *Culex quinquefasciatus* Say larvae. *Parasitol.*  
405 *Res.* 114(10), 3835–3853. <https://doi.org/10.1007/s00436-015-4614-9>
- 406 Prakash, O.M., Chandra, M., Pant, A.K., Rawat, D.S., 2016. Mint (*Mentha spicata* L.) oils, in:  
407 *Essential Oils in Food Preservation, Flavor and Safety*. Elsevier, pp. 561–572. ISBN  
408 9780124166448.
- 409 Radwan, M.A., El-Zemity, S.R., Mohamed, S.A., Sherby, S.M., 2008. Larvicidal activity of some  
410 essential oils, monoterpenoids and their corresponding N-methyl carbamate derivatives  
411 against *Culex pipiens* (Diptera: Culicidae). *Int. J. Trop. Insect Sci.* 28(2), 61–68.  
412 <https://doi.org/10.1017/s1742758408962366>
- 413 Rai, V. K., Sinha, P., Yadav, K. S., Shukla, A., Saxena, A., Bawankule, D. U., Tandon, S., Khan,  
414 F., Chanotiya, C. S., Yadav, N. P., 2020. Anti-psoriatic effect of *Lavandula angustifolia*  
415 essential oil and its major components linalool and linalyl acetate. *J. Ethnopharmacol.*  
416 261, 113127. <https://doi.org/10.1016/j.jep.2020.113127>
- 417 Ramos da Silva, L. R., Ferreira, O. O., Cruz, J. N., de Jesus Pereira Franco, C., Oliveira Dos Anjos,  
418 T., Cascaes, M. M., Almeida da Costa, W., Helena de Aguiar Andrade, E., & Santana de  
419 Oliveira, M., 2021. Lamiaceae Essential Oils, Phytochemical Profile, Antioxidant, and  
420 Biological Activities. *Evid Based Complement Alternat Med.: eCAM*, 2021, 6748052.  
421 <https://doi.org/10.1155/2021/6748052>
- 422 Samarasekera, R., Weerasinghe, I.S., Hemalal, K.P., 2008. Insecticidal activity of menthol  
423 derivatives against mosquitoes. *Pest. Manag. Sci.* 64, 290-295.  
424 <https://doi.org/10.1002/ps.1516>
- 425 Sharma, S., Loach, N., Gupta, S., Mohan, L., 2022. Evaluation of larval toxicity, mode of action  
426 and chemical composition of citrus essential oils against *Anopheles stephensi* and *Culex*

427           quinquefasciatus.    Biocatal.    Agric.    Biotechnol.    39,    102284.  
428           <https://doi.org/10.1016/j.bcab.2022.102284>

429   Tabari, M.A., Youssefi, M.R., Esfandiari, A., Benelli, G., 2017. Toxicity of  $\beta$ -citronellol, geraniol  
430           and linalool from *Pelargonium roseum* essential oil against the West Nile and filariasis  
431           vector *Culex pipiens* (Diptera: Culicidae). *Res. Vet. Sci.* 114, 36–40.  
432           <https://doi.org/https://doi.org/10.1016/j.rvsc.2017.03.001>

433   Traboulsi, A.F., Taoubi, K., El-Haj, S., Bessiere, J., Rammal, S., 2002. Insecticidal properties of  
434           essential plant oils against the mosquito *Culex pipiens molestus* (Diptera: Culicidae).  
435           *Pest. Manag. Sci.*, 58, 491-495. <https://doi.org/10.1002/ps.486>

436   WHO. 2005. Guidelines for laboratory and field testing of mosquito larvicides. World Health  
437           Organization,                           1–41.                           Retrieved                           from  
438           [http://whqlibdoc.who.int/hq/2005/WHO\\_CDS\\_WHOPES\\_GCDPP\\_2005.13.pdf?ua=1](http://whqlibdoc.who.int/hq/2005/WHO_CDS_WHOPES_GCDPP_2005.13.pdf?ua=1)

439   WHO. 2016. Test procedures for insecticide resistance monitoring in malaria vector mosquitoes,  
440           (Second edition) (Updated June 2018). pp. 1–48.  
441           <https://apps.who.int/iris/bitstream/handle/10665/250677/9789241511575-eng.pdf>

442   Zahran, H.E.-D.M., Abou-Taleb, H.K., Abdelgaleil, S.A.M., 2017. Adulticidal, larvicidal and  
443           biochemical properties of essential oils against *Culex pipiens* L. *J. Asia. Pac. Entomol.*  
444           20(1), 133–139. <https://doi.org/10.1016/j.aspen.2016.12.006>

445   Zeghib, F., Tine-Djebbar, F., Zeghib, A., Bachari, K., Sifi, K., Soltani, N., 2020. Chemical  
446           Composition and Larvicidal Activity of *Rosmarinus officinalis* Essential Oil Against  
447           West Nile Vector Mosquito *Culex pipiens* (L.). *J. Essent. Oil Bear. Plants* 23(6), 1463–  
448           1474. <https://doi.org/10.1080/0972060X.2020.1860138>

449   Zhu, L., Tian, Y., 2013. Chemical composition and larvicidal activity of essential oil of *Artemisia*  
450           *gilvescens* against *Anopheles anthropophagus*. *Parasitol. Res.* 112(3), 1137–1142.  
451           <https://doi.org/10.1007/s00436-012-3243-9>

452  
453  
454  
455  
456  
457



# Larvicidal and Adulticidal Activity of Essential Oils from Plants of the Lamiaceae Family against the West Nile Virus Vector, *Culex pipiens* (Diptera: Culicidae)

---

ORIGINALITY REPORT

---

# 16%

SIMILARITY INDEX

---

PRIMARY SOURCES

---

- |   |                                                                                                                                                                                                                                           |               |
|---|-------------------------------------------------------------------------------------------------------------------------------------------------------------------------------------------------------------------------------------------|---------------|
| 1 | Hossam El-Din M. Zahran, Hamdy K. Abou-Taleb, Samir A.M. Abdelgaleil. "Adulticidal, larvicidal and biochemical properties of essential oils against <i>Culex pipiens</i> L", <i>Journal of Asia-Pacific Entomology</i> , 2017<br>Crossref | 43 words — 1% |
| 2 | <a href="http://www.mdpi.com">www.mdpi.com</a><br>Internet                                                                                                                                                                                | 37 words — 1% |
| 3 | <a href="http://www.science.gov">www.science.gov</a><br>Internet                                                                                                                                                                          | 36 words — 1% |
| 4 | <a href="http://www.ncbi.nlm.nih.gov">www.ncbi.nlm.nih.gov</a><br>Internet                                                                                                                                                                | 27 words — 1% |
| 5 | <a href="http://iwaponline.com">iwaponline.com</a><br>Internet                                                                                                                                                                            | 26 words — 1% |
| 6 | <a href="http://WWW.mdpi.com">WWW.mdpi.com</a><br>Internet                                                                                                                                                                                | 23 words — 1% |
| 7 | Toshio KAWAI, Tsuneyuki YAMAUCHI, Yuriko MIYAMA, Haruhiko SAKURAI, Hirohiko UKAI, Shiro TAKADA, Fumiko OHASHI, Masayuki IKEDA. "Benzyl Alcohol as a                                                                                       | 22 words — 1% |

Marker of Occupational Exposure to Toluene", Industrial Health, 2007

Crossref

8 Leandro P. França, Ana Claudia F. Amaral, Aline de S. Ramos, José Luiz P. Ferreira et al. "Piper capitarianum essential oil: a promising insecticidal agent for the management of *Aedes aegypti* and *Aedes albopictus*", Environmental Science and Pollution Research, 2020

20 words — < 1%

Crossref

9 [www.sciencepub.net](http://www.sciencepub.net)

Internet

20 words — < 1%

10 [link.springer.com](http://link.springer.com)

Internet

19 words — < 1%

11 Shalika Rathore, Srijana Mukhia, Smita Kapoor, Vinod Bhatt, Rakshak Kumar, Rakesh Kumar.

"Seasonal variability in essential oil composition and biological activity of *Rosmarinus officinalis* L. accessions in the western Himalaya", Scientific Reports, 2022

18 words — < 1%

Crossref

12 [www.entomoljournal.com](http://www.entomoljournal.com)

Internet

18 words — < 1%

13 [www.hindawi.com](http://www.hindawi.com)

Internet

16 words — < 1%

14 [www.frontiersin.org](http://www.frontiersin.org)

Internet

15 words — < 1%

15 Ahmed H. Tantawy, Shaimaa M. Farag, Lamees Hegazy, Hong Jiang, Man-Qun Wang. "The larvicidal activity of natural inspired piperine-based

14 words — < 1%

- 16 Mohamed Habib Oueslati, Nael Abutaha, Faraj Al-Ghamdi, Imededdine Arbi Nehdi et al. "Analysis of the chemical composition and in vitro cytotoxic activities of the essential oil of the aerial parts of *Lavandula atriplicifolia* Benth", *Journal of King Saud University - Science*, 2020

13 words — < 1%

Crossref

- 17 Abdulrhman A. Almadiy, Gomah E. Nenaah. "Bioactivity and safety evaluations of *Cupressus sempervirens* essential oil, its nanoemulsion and main terpenes against *Culex quinquefasciatus* Say", *Environmental Science and Pollution Research*, 2021

12 words — < 1%

Crossref

- 18 Adam Kowalczyk, Elżbieta Piątkowska, Piotr Kuś, Zvonimir Marijanović, Igor Jerković, Carlo I.G. Tuberoso, Izabela Fecka. "Volatile compounds and antibacterial effect of commercial mint cultivars - chemotypes and safety", *Industrial Crops and Products*, 2021

12 words — < 1%

Crossref

- 19 Hojjat Jahanian, Niloofar Kahkeshani, Alireza Sanei-Dehkordi, Murray B. Isman, Mina Saeedi, Mahnaz Khanavi. " as a natural insecticide: a review ", *International Journal of Pest Management*, 2022

12 words — < 1%

Crossref

- 20 bioone.org

Internet

12 words — < 1%

- 21 Nehad E.M. Taktak, Mohamed E.I. Badawy. "Potential of hydrocarbon and oxygenated monoterpenes against *Culex pipiens* larvae: Toxicity,

11 words — < 1%

biochemical, pharmacophore modeling and molecular docking studies", Pesticide Biochemistry and Physiology, 2019

Crossref

22 Welton Aaron de Almeida, Isabella Coimbra Vila Nova, Jéssica da Silva Nascimento, Maiara Celine de Moura et al. "Effects of *Plectranthus barbatus* leaf extract on survival, digestive proteases, midgut morphophysiology and gut microbiota homeostasis of *Aedes aegypti* larvae", South African Journal of Botany, 2021

Crossref

23 onlinelibrary.wiley.com 11 words — < 1%

Internet

24 "Role of plants and plant based products towards the control of insect pests and vectors: A novel review", Journal of Coastal Life Medicine, 2016

Crossref

25 Liang Zhu, Yingjuan Tian. "Chemical composition and larvicidal activity of essential oil of *Artemisia gilvescens* against *Anopheles anthropophagus*", Parasitology Research, 2012

Crossref

26 M. Shimoda. "Volatile Flavor Compounds of Sweetened Condensed Milk", Journal of Food Science, 8/2001

Crossref

27 Marimuthu Govindarajan, Rajamohan Sivakumar, Mohan Rajeswary, Kaliyan Veerakumar. "Mosquito larvicidal activity of thymol from essential oil of *Coleus aromaticus* Benth. against *Culex tritaeniorhynchus*, *Aedes albopictus*, and *Anopheles subpictus* (Diptera: Culicidae)", Parasitology Research, 2013

Crossref

---

28 Petya K. Christova, Ivaiyla N. Dincheva, Slavtcho B. Slavov, Ana M. Dobрева et al. "Evaluation of growth response of phytopathogens *Alternaria alternata*, *Diaporthe nobilis* and *Phytophthora plurivora* to inhibitory potential of three essential oils of *Monarda didyma* genotypes", *Journal of Plant Diseases and Protection*, 2021  
Crossref 10 words — < 1%

---

29 Samia M.M. Mohafrash, Sahar Ahmed Fallatah, Shaimaa Mahmoud Farag, Abdel-Tawab H. Mossa. "Mentha spicata essential oil nanoformulation and its larvicidal application against *Culex pipiens* and *Musca domestica*", *Industrial Crops and Products*, 2020  
Crossref 10 words — < 1%

---

30 [bio-protocol.org](https://www.bio-protocol.org)  
Internet 10 words — < 1%

---

31 [preview-behavioralandbrainfunctions.biomedcentral.com](https://preview-behavioralandbrainfunctions.biomedcentral.com)  
Internet 10 words — < 1%

---

32 [repository.up.ac.za](https://repository.up.ac.za)  
Internet 10 words — < 1%

---

33 [www.scielo.br](https://www.scielo.br)  
Internet 10 words — < 1%

---

34 Paula Sampaio Araújo, Maxwell Batista Caixeta, Aryelle Canedo, Eloiza da Silva Nunes, Caio Monteiro, Thiago Lopes Rocha. "Toxicity of plant-based silver nanoparticles to vectors and intermediate hosts: Historical review and trends", *Science of The Total Environment*, 2022  
Crossref 9 words — < 1%

---

35 [www.isnff-jfb.com](https://www.isnff-jfb.com)  
Internet

9 words — < 1%

36 [www.jvbd.org](http://www.jvbd.org)  
Internet

9 words — < 1%

37 Guido Flamini, Pier Luigi Cioni, Ivano Morelli, Mario Macchia, Lucia Ceccarini. " Main Agronomic–Productive Characteristics of Two Ecotypes of L. and Chemical Composition of Their Essential Oils ", Journal of Agricultural and Food Chemistry, 2002  
Crossref

38 Radhika Samarasekera. "Insecticidal activity of menthol derivatives against mosquitoes", Pest Management Science, 03/2008  
Crossref

39 Sen-Sung Cheng, Ju-Yun Liu, Kun-Hsien Tsai, Wei-June Chen, Shang-Tzen Chang. " Chemical Composition and Mosquito Larvicidal Activity of Essential Oils from Leaves of Different Provenances ", Journal of Agricultural and Food Chemistry, 2004  
Crossref

40 Tharsius Raja William Raja, Pathalam Ganesan, Munusamy Rajiv Gandhi, Veeramuthu Duraipandiyar et al. "Effect of compound Musizin isolated from Rhamnus wightii Wight and Arn on the immature stages of filarial vector mosquito Culex quinquefasciatus Say (Diptera: Culicidae) and its non-target studies", Biocatalysis and Agricultural Biotechnology, 2018  
Crossref

41 Zhaojun Sheng, Rongchao Jian, Fangying Xie, Bin Chen et al. "Screening of larvicidal activity of 53 essential oils and their synergistic effect for the improvement

# of deltamethrin efficacy against *Aedes albopictus*", Industrial Crops and Products, 2020

Crossref

42 [meridian.allenpress.com](http://meridian.allenpress.com) 8 words — < 1%  
Internet

43 [stars.library.ucf.edu](http://stars.library.ucf.edu) 8 words — < 1%  
Internet

44 [www.fspublishers.org](http://www.fspublishers.org) 8 words — < 1%  
Internet

45 [www.mapress.com](http://www.mapress.com) 8 words — < 1%  
Internet

46 [www.tandfonline.com](http://www.tandfonline.com) 8 words — < 1%  
Internet

47 E. Evergetis. "Chemical composition and larvicidal activity of essential oils from six Apiaceae family taxa against the West Nile virus vector *Culex pipiens*", Parasitology Research, 02/26/2009 7 words — < 1%  
Crossref

48 Gillij, Y.G.. "Mosquito repellent activity of essential oils of aromatic plants growing in Argentina", Bioresource Technology, 200805 7 words — < 1%  
Crossref

49 Sara El Kharraf, Soukaina El-Guendouz, Abdellah Farah, Bahia Bennani, Maria C. Mateus, El Mestafa El Hadrami, M. Graça Miguel. "Hydrodistillation and simultaneous hydrodistillation-steam distillation of *Rosmarinus officinalis* and *Origanum compactum*: Antioxidant, anti-inflammatory, and antibacterial effect of the essential oils", Industrial Crops and Products, 2021 7 words — < 1%  
Crossref

---

50 "Recent Advances in Environmental Science from the Euro-Mediterranean and Surrounding Regions", Springer Nature, 2018 6 words — < 1%  
Crossref

---

51 Advances in Plant Biopesticides, 2014. 6 words — < 1%  
Crossref

---

52 Giovanni Benelli, Roman Pavela, Rianasoambolanoro Rakotosaona, Emmanuel Randrianarivo, Marcello Nicoletti, Filippo Maggi. " Chemical composition and insecticidal activity of the essential oil from endemic to Madagascar ", Natural Product Research, 2017 4 words — < 1%  
Crossref

---

EXCLUDE QUOTES OFF

EXCLUDE BIBLIOGRAPHY ON

EXCLUDE SOURCES OFF

EXCLUDE MATCHES OFF
